# Supplementary material for: Multiplex methods provide effective integration of multi-omic data in genome-scale models
Source: BMC Bioinformatics. 2016 Mar 2;17(Suppl 4):83. doi: 10.1186/s12859-016-0912-1 (PMC4896256; doi:10.1186/s12859-016-0912-1)
Supplement: Additional file 2 — Flux rates of Colombos conditions. Full list of Colombos conditions and the corresponding flux rates predicted using trilevel linear programming. (XLSX 364 kb) [file 12859_2016_912_MOESM2_ESM.xlsx]

## Sheet: Biomass-acetate-formate
Condition	Data source	Platform	Oxygen status	Biomass	Acetate exchange	Formate exchange	Cluster
GSE1121_anaerobic_wt	GEO	affymetrix	Anaerobic	0.889064	1.19383	1.52655e-10	2
GSE1121_anaerobic_soxS	GEO	affymetrix	Anaerobic	0.969773	-2.4655e-11	8.38327e-11	2
GSE3250_ppsA_acetateShift_15min	GEO	cDNA	Aerobic	0.273094	-1.7993e-10	3.30557e-11	2
GSE3591_anaerobic_fnr_NO3	GEO	cDNA	Anaerobic	0.354579	4.23271	0.00094888	1
GSE1780_075mMCopper	GEO	cDNA	Aerobic	0.362331	5.76502	4.63362e-10	3
GSE3591_anaerobic_wt	GEO	cDNA	Anaerobic	0.624164	4.85731e-09	-2.24629e-10	2
GSE1780_2mMCopper	GEO	cDNA	Aerobic	0.105157	23.5785	9.64747	2
GSE3591_anaerobic_fnr_NO3	GEO	cDNA	Anaerobic	0.319138	10.9383	0.882468	3
GSE3437_rpoE_30min	GEO	cDNA	Aerobic	0.195675	4.00776	4.84883	1
GSE3437_rpoE_0min	GEO	cDNA	Aerobic	0.550083	1.51566e-10	8.83207e-10	1
GSE3591_anaerobic_fnr_NO2	GEO	cDNA	Anaerobic	0.236769	14.2703	-9.21461e-11	1
GSE3591_anaerobic_wt_NO2	GEO	cDNA	Anaerobic	0	0	0	2
GSE3591_aerobic_fnr	GEO	cDNA	Anaerobic	0.442395	3.43281	0.569563	3
GSE3591_anaerobic_wt_NO3	GEO	cDNA	Anaerobic	0.65426	2.80938	8.10258	3
GSE3437_rpoE_5min	GEO	cDNA	Aerobic	0.671196	3.09577	-3.11382e-13	2
GSE3250_ppsA_acetateShift_6h	GEO	cDNA	Aerobic	0.0821764	2.93364	2.11291	2
GSE3591_anaerobic_wt_NO2	GEO	cDNA	Anaerobic	0.412316	14.3502	6.07814	2
GSE3591_anaerobic_fnr	GEO	cDNA	Anaerobic	0	0	0	2
GSE3250_ppsA_acetateShift_2h	GEO	cDNA	Aerobic	0.28947	5.75945	0.444724	1
GSE3437_rpoE_60min	GEO	cDNA	Aerobic	0.2515	3.85902	5.57389	2
GSE3437_rpoE_5min	GEO	cDNA	Aerobic	0.133782	3.16134	2.74256	2
GSE4511_aerobic_pH5.0	GEO	affymetrix	Aerobic	0.519252	3.26884	0.00138952	3
GSE5239_BL21_mu0.46	GEO	affymetrix	Aerobic	0.69531	-9.63854e-10	2.2736e-10	3
GSE3591_anaerobic_fnr_NO2	GEO	cDNA	Anaerobic	0.33348	0.872115	6.84918	2
GSE3105_fur1_arabinose	GEO	affymetrix	Aerobic	0.143471	4.34464	3.63638	2
GSE3250_ppsA_acetateShift_5h	GEO	cDNA	Aerobic	0.154825	1.08053	-1.01931e-10	2
GSE3250_ppsA_acetateShift_4h	GEO	cDNA	Aerobic	0.198245	0.0392548	2.73936e-09	2
GSE3591_anaerobic_wt_NO3	GEO	cDNA	Anaerobic	0.899567	-9.63817e-11	3.4784e-10	3
GSE4112_dpiADouble_MidLogPhase	GEO	cDNA	Aerobic	0.944969	-8.60157e-11	-3.53238e-10	1
GSE3591_aerobic_fnr	GEO	cDNA	Aerobic	0.549228	12.9923	9.61928	2
GSE3905_suspension_15h	GEO	affymetrix	Aerobic	0.253258	4.82651	-2.67679e-10	1
GSE3437_rpoE_15min	GEO	cDNA	Aerobic	0.861368	-1.60214e-10	-5.97663e-11	2
GSE3105_wt2_arabinose	GEO	affymetrix	Aerobic	0.444701	16.8893	5.61168e-11	1
GSE4511_aerobic_pH5.0	GEO	affymetrix	Aerobic	0.590283	3.86202	1.01521e-09	3
GSE3250_ppsA_acetateShift_6h	GEO	cDNA	Aerobic	0.195649	1.04875	1.86327e-10	1
GSE3250_ppsA_acetateShift_5h	GEO	cDNA	Aerobic	0.133877	0.698151	-1.99494e-10	1
GSE3250_ppsA_acetateShift_5h	GEO	cDNA	Aerobic	0.133807	4.68102	2.78265	2
GSE3250_wt_acetateShift_5min	GEO	cDNA	Aerobic	0.186835	1.3964	0.000499971	2
GSE3591_anaerobic_narXLP_NO2	GEO	cDNA	Anaerobic	0.395985	16.5095	2.20272	1
E-MEXP-222_Zn_1	ArrayExpress	cDNA	Aerobic	0.0753963	5.61211	-1.17631e-10	2
GSE3437_rpoE_10min	GEO	cDNA	Aerobic	0.199451	13.5405	-1.60093e-11	1
GSE3437_rpoE_2.5min	GEO	cDNA	Aerobic	0.355781	3.42134	0.625259	1
GSE3437_rpoE_60min	GEO	cDNA	Aerobic	0.191666	2.90887	0.967925	3
GSE3105_wt2_arabinose_FeSO4	GEO	affymetrix	Aerobic	0.0674244	1.38618	0.965144	2
GSE4706_500hours	GEO	cDNA	Aerobic	0.340494	0.847625	4.08654	1
GSE3250_ppsA_acetateShift_1h	GEO	cDNA	Aerobic	0.184698	1.74187	2.22736e-10	2
E-MEXP-267_hda	ArrayExpress	cDNA	Aerobic	0	0	0	2
GSE4511_aerobic_pH5.0	GEO	affymetrix	Aerobic	0.742538	3.24205	2.35588e-09	3
GSE3250_ppsA_acetateShift_4h	GEO	cDNA	Aerobic	0.558179	6.61296	2.4451e-10	1
GSE3250_ppsA_acetateShift_3h	GEO	cDNA	Aerobic	0.292355	9.9425e-10	-1.85694e-11	2
GSE5239_BL21_mu0.46	GEO	affymetrix	Aerobic	0.60357	10.2901	8.54742	3
GSE3591_anaerobic_wt	GEO	cDNA	Anaerobic	0.523092	15.6353	-1.07711e-09	3
GSE2129_anaeroob_GSNO	GEO	cDNA	Anaerobic	0.691051	10.2679	1.3917e-10	1
GSE3591_aerobic_fnr	GEO	cDNA	Aerobic	0	0	0	2
GSE3250_wt_acetateShift_3h	GEO	cDNA	Aerobic	0.338321	3.77239	-5.54817e-11	3
GSE3905_suspension_4h	GEO	affymetrix	Aerobic	0.830572	5.14695e-11	-1.24564e-11	2
GSE3250_ppsA_acetateShift_4h	GEO	cDNA	Aerobic	0.230652	3.76255	1.70172	2
GSE3250_ppsA_acetateShift_4h	GEO	cDNA	Aerobic	0.110193	3.58031	2.62539	2
GSE3250_wt_acetateShift_6h	GEO	cDNA	Aerobic	0.675793	7.63353	7.33603e-11	1
GSE3591_anaerobic_narXL_NO2	GEO	cDNA	Anaerobic	0.405204	8.63002	2.99982	2
GSE3250_wt_acetateShift_5min	GEO	cDNA	Aerobic	0.152838	0.491862	-4.13593e-11	2
GSE4321_rpoH_5min	GEO	cDNA	Aerobic	0.449295	6.7374	9.49646e-11	1
GSE4511_aerobic_pH5.0	GEO	affymetrix	Aerobic	0.366038	4.89604	0.000979508	3
GSE3591_anaerobic_fnr_NO3	GEO	cDNA	Anaerobic	0.279444	1.83706	10.5431	3
GSE3250_ppsA_acetateShift_1h	GEO	cDNA	Aerobic	0.182995	1.01173	-9.06945e-11	1
GSE3250_wt_acetateShift_6h	GEO	cDNA	Aerobic	0.340017	2.23262	20.8705	3
GSE5239_BL21pOri2_mu0.29	GEO	affymetrix	Aerobic	0.76404	7.76266	2.9866e-11	2
GSE3105_wt1_arabinose_FeSO4	GEO	affymetrix	Aerobic	0.316357	2.55488	2.41376	2
GSE3250_ppsA_acetateShift_3h	GEO	cDNA	Aerobic	0.223182	1.25068	-1.5879e-10	2
GSE4706_40hours	GEO	cDNA	Aerobic	0.151882	14.3732	5.76383	1
GSE533_temperatureEvolved_line3	GEO	p33	Aerobic	0.297721	4.43345	1.96713	2
GSE3250_wt_acetateShift_3h	GEO	cDNA	Aerobic	0.406091	3.92989	17.4844	2
GSE3437_rpoE_5min	GEO	cDNA	Aerobic	0.26661	3.50258	2.20356e-12	1
GSE3250_ppsA_acetateShift_4h	GEO	cDNA	Aerobic	0.117724	3.47923	3.8856	2
GSE3250_wt_acetateShift_2h	GEO	cDNA	Aerobic	0.475502	4.79473	1.07474e-09	3
GSE3591_anaerobic_fnr	GEO	cDNA	Anaerobic	0.44488	3.31804	4.70893e-09	3
GSE4321_rpoH_5min	GEO	cDNA	Aerobic	0.656152	0.267078	-3.15146e-10	1
GSE4321_rpoH_2.5min	GEO	cDNA	Aerobic	1.00419	1.89877e-11	1.43989e-11	3
GSE3250_wt_acetateShift_3h	GEO	cDNA	Aerobic	0.334891	13.4194	-2.5732e-10	2
GSE2928_dam_mutS	GEO	affymetrix	Aerobic	0.903137	3.99933	-9.17078e-12	1
GSE3250_wt_acetateShift_6h	GEO	cDNA	Aerobic	0.109682	2.09155	0.00029351	2
GSE533_temperatureEvolved_line3	GEO	p33	Aerobic	0.0739956	1.72268	1.76151	2
E-MEXP-245_qor	ArrayExpress	cDNA	Aerobic	0.269835	2.1916	11.3147	3
GSE1121_anaerobic_soxS	GEO	affymetrix	Anaerobic	0.956275	-3.67573e-11	1.44756e-10	2
GSE4321_rpoH_10min	GEO	cDNA	Aerobic	0.755418	1.33704	8.45955e-11	1
GSE3250_wt_acetateShift_4h	GEO	cDNA	Aerobic	0.259617	8.11786	1.59592e-10	2
E-MEXP-267_datA	ArrayExpress	cDNA	Aerobic	0.195511	3.99767	-1.55113e-10	1
GSE1121_aerobic_fnr	GEO	affymetrix	Aerobic	0.548159	9.33439	6.15929	3
GSE3250_wt_acetateShift_2h	GEO	cDNA	Aerobic	0.275226	11.3312	1.22241e-10	3
GSE3250_wt_acetateShift_15min	GEO	cDNA	Aerobic	0.0539888	0.880823	1.09164	2
GSE3250_wt_acetateShift_30min	GEO	cDNA	Aerobic	0.0553963	0.726906	8.52544	2
GSE1121_aerobic_arcAfnr	GEO	affymetrix	Aerobic	0.285015	6.18148	0.0007627	1
GSE3250_wt_acetateShift_1h	GEO	cDNA	Aerobic	0.269183	11.1065	-3.85261e-10	2
GSE4941_IAA	GEO	p33	Aerobic	0	0	0	2
GSE3250_ppsA_acetateShift_2h	GEO	cDNA	Aerobic	0.118006	1.67939	-1.10996e-08	2
GSE1121_anaerobic_appY	GEO	affymetrix	Anaerobic	0.955647	-3.02216e-12	3.91153e-11	3
GSE3250_ppsA_acetateShift_6h	GEO	cDNA	Aerobic	0.111839	7.02566	1.9889	2
GSE2037_ala	GEO	affymetrix	Aerobic	0.171183	8.82207	-3.1969e-10	2
GSE2037_gly	GEO	affymetrix	Aerobic	0.381213	2.62323	0.621207	3
GSE4321_rpoH_20min	GEO	cDNA	Aerobic	0.585104	-2.10621e-09	-2.22484e-10	2
GSE3250_wt_acetateShift_5h	GEO	cDNA	Aerobic	0.219606	0.711712	-6.49383e-11	1
E-MEXP-267_wt	ArrayExpress	cDNA	Aerobic	0.447228	7.0344	0.534726	2
GSE1121_aerobic_soxS	GEO	affymetrix	Aerobic	1.00088	6.01309e-12	6.24161e-12	3
GSE3250_wt_acetateShift_30min	GEO	cDNA	Aerobic	0.0458921	0.922062	0.789649	2
GSE3250_wt_acetateShift_4h	GEO	cDNA	Aerobic	0.713851	2.55572	1.53329	1
GSE3250_wt_acetateShift_15min	GEO	cDNA	Aerobic	0.0624742	0.99812	1.63692	2
GSE4321_rpoH_5min	GEO	cDNA	Aerobic	0.520486	5.26181	-1.22128e-10	1
GSE3250_wt_acetateShift_15min	GEO	cDNA	Aerobic	0.0554312	1.11846	1.04396	2
GSE1121_anaerobic_arcAfnr	GEO	affymetrix	Anaerobic	0.84126	-9.53198e-14	-3.25844e-11	1
GSE1121_aerobic_arcA	GEO	affymetrix	Aerobic	0.703186	8.08953	6.08805	2
GSE3250_wt_acetateShift_1h	GEO	cDNA	Aerobic	0.264016	3.8478	9.32123	2
GSE3250_wt_acetateShift_1h	GEO	cDNA	Aerobic	0.318292	4.99097	-9.47895e-11	3
E-MEXP-267_datA	ArrayExpress	cDNA	Aerobic	0.228189	20.9301	5.50172	1
GSE1421	GEO	cDNA	Aerobic	0	0	0	2
GSE3250_wt_acetateShift_1h	GEO	cDNA	Aerobic	0.268538	2.49366	1.5989	2
GSE2037_glu	GEO	affymetrix	Aerobic	0.1826	15.5131	12.3183	3
GSE3250_ppsA_acetateShift_1h	GEO	cDNA	Aerobic	0	0	0	2
E-MEXP-222_Zn_1	ArrayExpress	cDNA	Aerobic	0.294884	3.80495	2.41551	1
E-MEXP-245_qor	ArrayExpress	cDNA	Aerobic	0.606986	1.92161	-1.21689e-10	1
GSE1121_anaerobic_soxS	GEO	affymetrix	Anaerobic	0.828293	-1.3572e-11	1.83915e-12	2
GSE1121_aerobic_soxS	GEO	affymetrix	Aerobic	0.960877	-2.98525e-12	0.487325	3
GSE4321_rpoH_2.5min	GEO	cDNA	Aerobic	0.814117	5.17885	0.00217858	3
GSE3250_wt_acetateShift_4h	GEO	cDNA	Aerobic	0.254206	3.01317	4.38913	3
GSE2095_aeroob_GSNO	GEO	cDNA	Aerobic	0.858308	3.58944	1.61752e-12	1
GSE3250_wt_acetateShift_4h	GEO	cDNA	Aerobic	0	0	0	2
GSE2129_anaeroob_GSNO	GEO	cDNA	Anaerobic	0.497176	4.60711	1.53583	1
GSE2095_aeroob_GSNO	GEO	cDNA	Aerobic	0.524361	6.55448	3.50243e-11	1
E-MEXP-244_HOCl	ArrayExpress	cDNA	Aerobic	0.334708	1.22155	5.64211e-10	3
E-MEXP-245_qor	ArrayExpress	cDNA	Aerobic	0.25474	0.991547	6.99217	3
GSE1121_anaerobic_oxyR	GEO	affymetrix	Anaerobic	0.835204	-6.44068e-12	-4.52018e-11	3
GSE2037_proline	GEO	affymetrix	Aerobic	0.0903303	0.668951	8.70289	2
GSE5239_BL21pOri1_mu0.39	GEO	affymetrix	Aerobic	1.00499	-1.09286e-10	3.67042e-10	3
GSE3250_wt_acetateShift_1h	GEO	cDNA	Aerobic	0.123408	3.03986	1.24096	2
GSE3591_anaerobic_fnr_NO2	GEO	cDNA	Anaerobic	0.169523	2.18244	5.90634	3
GSE4112_dpiADouble_MidLogPhase	GEO	cDNA	Aerobic	0.0943654	20.3977	27.1471	2
GSE1121_anaerobic_fnr	GEO	affymetrix	Anaerobic	0.952629	-3.19131e-10	1.37809e-09	1
GSE5239_BL21pOri1_mu0.39	GEO	affymetrix	Aerobic	0.987726	-1.1157e-09	-6.24364e-10	1
GSE3591_anaerobic_narXLP_NO2	GEO	cDNA	Anaerobic	0.220471	5.4869	3.68288	1
GSE3591_anaerobic_narXL_NO2	GEO	cDNA	Anaerobic	0.267266	5.87545	3.358	1
GSE3250_wt_acetateShift_3h	GEO	cDNA	Aerobic	0.860741	0.707113	7.0087e-11	3
GSE3437_rpoE_0min	GEO	cDNA	Aerobic	0.64931	-6.22403e-11	2.48475e-12	3
GSE4321_rpoH_0min	GEO	cDNA	Aerobic	0.427461	3.18284	-3.42145e-10	1
GSE1121_anaerobic_wt	GEO	affymetrix	Anaerobic	0.95037	3.70536e-11	2.62022e-11	3
GSE3105_wt2_arabinose_FeSO4	GEO	affymetrix	Aerobic	0.0979056	19.9245	8.79181e-12	2
GSE3591_anaerobic_fnr	GEO	cDNA	Anaerobic	0.386012	2.35503	4.0749e-10	3
GSE4112_dpiA	GEO	cDNA	Aerobic	0.976289	-3.29889e-11	-2.02654e-11	2
GSE3591_aerobic_fnr	GEO	cDNA	Aerobic	0	0	0	2
GSE3937_jliH_24h	GEO	affymetrix	Aerobic	0.38696	2.95799	2.57486	1
GSE5239_BL21pOri1_mu0.39	GEO	affymetrix	Aerobic	0.598484	9.14746	-1.07576e-08	1
E-MEXP-245_qor	ArrayExpress	cDNA	Aerobic	0.668664	4.53071	2.2433e-10	2
GSE3591_anaerobic_narXL_NO2	GEO	cDNA	Anaerobic	0.404428	12.9571	5.89214	1
GSE3591_anaerobic_wt_NO3	GEO	cDNA	Anaerobic	0.310817	13.4488	1.06321	1
GSE4511_aerobic_pH7.0	GEO	affymetrix	Aerobic	0.217058	2.80135	2.28271	1
GSE5239_BL21pOri2_mu0.29	GEO	affymetrix	Aerobic	0.94318	1.15879	5.53991e-12	1
GSE5239_BL21pOri1_mu0.39	GEO	affymetrix	Aerobic	0.41656	3.3643	0.00111471	1
GSE3905_biofilm_24h	GEO	affymetrix	Aerobic	0.220023	0.391058	1.30956e-09	2
GSE3105_wt1_arabinose	GEO	affymetrix	Aerobic	0.507471	0.21977	0.382937	3
GSE3937_wt_biofilm_24h	GEO	affymetrix	Aerobic	0.0738183	6.14931	5.30178e-10	2
GSE3591_aerobic_wt	GEO	cDNA	Anaerobic	0.14714	2.70921	1.11253	2
GSE3591_anaerobic_fnr	GEO	cDNA	Anaerobic	0.384666	4.57994	-5.09886e-13	3
E-MEXP-267_datA	ArrayExpress	cDNA	Aerobic	0.559558	3.50109	1.89786e-10	3
GSE3105_fur2_arabinose	GEO	affymetrix	Aerobic	0.0946705	7.16613	1.63516e-09	2
GSE4511_aerobic_pH7.0	GEO	affymetrix	Aerobic	0.236978	3.00721	2.72451	3
GSE3591_aerobic_wt	GEO	cDNA	Anaerobic	0	0	0	2
GSE5239_BL21pOri2_mu0.29	GEO	affymetrix	Aerobic	0.49086	7.28545	6.72942e-10	3
GSE3591_anaerobic_wt_NO3	GEO	cDNA	Anaerobic	0.270125	19.3456	0.948548	3
GSE5239_BL21_mu0.20	GEO	affymetrix	Aerobic	0.63001	10.6806	9.92188e-11	3
E-MEXP-267_seqA	ArrayExpress	cDNA	Aerobic	0.527356	12.7628	1.49597e-10	3
GSE3591_anaerobic_wt_NO2	GEO	cDNA	Anaerobic	0.400035	10.2056	18.6306	3
GSE3591_anaerobic_fnr	GEO	cDNA	Anaerobic	0.372331	10.9397	-2.61006e-10	1
GSE3591_anaerobic_wt_NO2	GEO	cDNA	Anaerobic	0.287855	2.02754	9.07297	3
GSE533_temperatureEvolved_line1	GEO	p33	Aerobic	0.326947	0.65005	-2.80402e-10	2
GSE1121_aerobic_arcA	GEO	affymetrix	Aerobic	0.808574	5.85694	2.83672	2
GSE4511_aerobic_pH8.7	GEO	affymetrix	Aerobic	0	0	0	2
GSE4511_aerobic_pH7.0	GEO	affymetrix	Aerobic	0.250794	2.42649	2.00714	3
GSE3250_ppsA_acetateShift_30min	GEO	cDNA	Aerobic	0.24585	2.10101e-09	-1.07448e-10	2
GSE3591_aerobic_wt	GEO	cDNA	Anaerobic	0	0	0	2
GSE5239_BL21pOri2_mu0.29	GEO	affymetrix	Aerobic	0.644686	12.0025	-2.01042e-10	1
GSE5239_BL21_mu0.20	GEO	affymetrix	Aerobic	1.01059	3.25646e-11	-2.92995e-11	3
GSE4706_500hours	GEO	cDNA	Aerobic	0.12701	0.884544	5.68328	1
GSE1780_2mMCopper	GEO	cDNA	Aerobic	0.111276	22.2418	4.37177	2
GSE3437_rpoE_30min	GEO	cDNA	Aerobic	0.12429	1.74153	4.00854	2
GSE3437_rpoE_5min	GEO	cDNA	Aerobic	0.619733	9.34041e-11	-1.01324e-10	3
GSE533_temperatureEvolved_line1	GEO	p33	Aerobic	0.0740721	0.788597	1.02859e-09	2
GSE533_ancestor	GEO	p33	Aerobic	0.223592	2.286	3.73932	2
GSE5239_BL21pOri2_mu0.20	GEO	affymetrix	Aerobic	1.0071	2.80024e-10	-1.25741e-09	3
GSE2037_glu	GEO	affymetrix	Aerobic	0.496331	3.25326	1.99418e-08	1
GSE2928_dam	GEO	affymetrix	Aerobic	0.640124	-2.47117e-11	3.68479e-10	2
GSE3905_suspension_24h	GEO	affymetrix	Aerobic	0.252794	0.995977	1.45145	2
GSE1121_aerobic_oxyR	GEO	affymetrix	Aerobic	0.32899	7.90982	3.33107	3
GSE1121_aerobic_fnr	GEO	affymetrix	Aerobic	0.441494	4.70607	0.0317579	3
GSE4511_aerobic_pH7.0	GEO	affymetrix	Aerobic	0.249378	3.48413	3.4175	1
GSE3591_anaerobic_wt_NO2	GEO	cDNA	Anaerobic	0.912067	2.02173e-09	-8.23811e-09	2
GSE5239_BL21pOri2_mu0.20	GEO	affymetrix	Aerobic	1.00437	9.99886e-10	-1.40668e-09	3
GSE5239_BL21_mu0.20	GEO	affymetrix	Aerobic	1.01062	-2.51139e-11	1.9588e-10	3
GSE3591_anaerobic_wt	GEO	cDNA	Anaerobic	0.273421	22.7214	6.46415e-10	2
E-MEXP-267_hda	ArrayExpress	cDNA	Aerobic	0.899528	4.28243e-12	2.65722e-11	1
GSE4724_P4Xwildtype	GEO	affymetrix	Aerobic	0.990474	1.96307e-10	5.57416e-10	3
GSE3250_ppsA_acetateShift_5h	GEO	cDNA	Aerobic	0.159248	2.75548	-1.10318e-11	2
GSE3250_ppsA_acetateShift_5h	GEO	cDNA	Aerobic	0.0469136	2.94017	2.69668	2
GSE4321_rpoH_10min	GEO	cDNA	Aerobic	0.928632	-1.87789e-11	4.47365e-12	1
GSE1780_2mMCopper	GEO	cDNA	Aerobic	0.162451	22.729	9.60515	3
GSE2037_succ	GEO	affymetrix	Aerobic	0.35635	2.6002	1.02121	2
GSE3591_anaerobic_fnr_NO2	GEO	cDNA	Anaerobic	0.732692	6.86008	1.09323	2
GSE2037_acetate	GEO	affymetrix	Aerobic	0.390676	0.319684	3.21107e-11	1
GSE3591_anaerobic_wt_NO2	GEO	cDNA	Anaerobic	0.268453	13.5664	1.74059e-09	2
GSE3591_aerobic_wt	GEO	cDNA	Aerobic	0.692663	8.50707	-8.05858e-11	2
GSE2928_mutS	GEO	affymetrix	Aerobic	0.833281	4.01349	0.00222986	1
GSE1121_anaerobic_appY	GEO	affymetrix	Anaerobic	0.950887	1.45103e-11	-5.53566e-11	3
GSE1121_aerobic_wt	GEO	affymetrix	Aerobic	0.938173	2.64014	0.00251055	3
GSE3437_rpoE_15min	GEO	cDNA	Aerobic	0.518429	3.59669	2.15134e-10	1
GSE3437_rpoE_60min	GEO	cDNA	Aerobic	0.358319	-2.97112e-10	9.29503e-11	1
GSE4511_aerobic_pH7.0	GEO	affymetrix	Aerobic	0.197202	2.20491	1.91014	1
GSE3250_ppsA_acetateShift_6h	GEO	cDNA	Aerobic	0.147235	1.43732	1.43923e-10	1
GSE5239_BL21pOri2_mu0.20	GEO	affymetrix	Aerobic	0.91937	-6.08534e-10	1.73595e-10	1
GSE5239_BL21_mu0.20	GEO	affymetrix	Aerobic	0.910569	5.41606e-11	-4.84274e-11	3
GSE4706_40hours	GEO	cDNA	Aerobic	0.151298	4.90967	7.44402	2
GSE3250_wt_acetateShift_15min	GEO	cDNA	Aerobic	0.0791734	2.14413	1.24867	2
GSE533_temperatureEvolved_line2	GEO	p33	Aerobic	0.173627	5.10556	2.16361	1
GSE2928_wt	GEO	affymetrix	Aerobic	0.901621	3.64729	-6.45311e-12	1
GSE1121_anaerobic_arcAfnr	GEO	affymetrix	Anaerobic	0.92117	1.61205e-11	-8.39932e-11	1
GSE1121_aerobic_appY	GEO	affymetrix	Aerobic	0.957478	-2.99672e-11	6.87859e-11	1
GSE4724_P4Xwildtype	GEO	affymetrix	Aerobic	0.997317	-6.34363e-10	-3.24287e-10	2
GSE3437_rpoE_20min	GEO	cDNA	Aerobic	0.429601	1.06528e-09	-2.47254e-09	2
GSE3250_ppsA_acetateShift_1h	GEO	cDNA	Aerobic	0.444318	9.38947e-10	2.62588e-10	2
GSE3250_ppsA_acetateShift_1h	GEO	cDNA	Aerobic	0	0	0	2
E-MEXP-244_HOCl	ArrayExpress	cDNA	Aerobic	0.243152	1.12104	-6.14825e-11	2
GSE2928_mutS	GEO	affymetrix	Aerobic	0.955936	1.92301	9.72448e-11	1
GSE1121_anaerobic_arcA	GEO	affymetrix	Anaerobic	0.455747	-1.23204e-09	-5.68914e-10	1
GSE3250_ppsA_acetateShift_5h	GEO	cDNA	Aerobic	0.184915	0.956322	1.03107e-10	2
GSE3591_anaerobic_fnr	GEO	cDNA	Anaerobic	0.621921	4.87754	-6.74754e-10	2
GSE5239_BL21pOri1_mu0.20	GEO	affymetrix	Aerobic	1.01058	4.30416e-10	-1.58211e-10	3
GSE3250_ppsA_acetateShift_2h	GEO	cDNA	Aerobic	0.232047	0.153708	-5.31774e-10	1
GSE3591_anaerobic_fnr_NO2	GEO	cDNA	Anaerobic	0.255207	3.17184	-1.04209e-10	1
GSE3591_aerobic_wt	GEO	cDNA	Aerobic	0.294587	-1.43202e-10	8.65776e-10	2
GSE4941_IAA	GEO	p33	Aerobic	0.113305	3.31094	1.28909	2
GSE3591_anaerobic_wt	GEO	cDNA	Anaerobic	0.298005	4.69847	12.2037	2
GSE3250_wt_acetateShift_4h	GEO	cDNA	Aerobic	0.394454	12.7111	2.54301e-11	2
GSE533_temperatureEvolved_line2	GEO	p33	Aerobic	0.229555	1.93491	-4.10685e-10	3
GSE3591_anaerobic_fnr_NO2	GEO	cDNA	Anaerobic	0.329363	8.25163	0.922573	1
GSE5239_BL21pOri2_mu0.20	GEO	affymetrix	Aerobic	0.522192	1.67512	-1.08197e-08	1
GSE2928_dam_mutS	GEO	affymetrix	Aerobic	0.484438	1.11714e-11	-4.24831e-11	2
GSE1121_anaerobic_wt	GEO	affymetrix	Anaerobic	0.702795	-7.11038e-11	2.96638e-11	1
GSE1121_aerobic_arcA	GEO	affymetrix	Aerobic	0.774286	4.56624	13.2042	3
GSE4724_P4Xwildtype_arg	GEO	affymetrix	Aerobic	0.835072	5.73522	2.47913	3
GSE4321_rpoH_0min	GEO	cDNA	Aerobic	0.38854	6.40796	0.555836	3
GSE4112_dpiA	GEO	cDNA	Aerobic	1.00878	5.1951e-10	-1.78282e-12	3
E-MEXP-222_Zn_3	ArrayExpress	cDNA	Aerobic	0.0815292	21.35	-1.4757e-11	2
GSE1121_anaerobic_oxyR	GEO	affymetrix	Anaerobic	0.935635	-8.2603e-12	7.47021e-12	3
GSE2095_aeroob_GSNO	GEO	cDNA	Aerobic	0.455174	9.80135	7.41737	3
GSE533_temperatureEvolved_line3	GEO	p33	Aerobic	0.162507	0.863283	1.53009e-08	2
GSE3591_anaerobic_fnr_NO3	GEO	cDNA	Anaerobic	0.298561	8.97335	5.23055	3
GSE3250_ppsA_acetateShift_1h	GEO	cDNA	Aerobic	0.478714	7.28254	-1.45044e-11	2
GSE4941_IAA	GEO	p33	Aerobic	0.568011	11.6332	-2.85772e-10	1
GSE2129_anaeroob_GSNO	GEO	cDNA	Anaerobic	0.415602	0.927815	6.51438	3
GSE2095_aeroob_GSNO	GEO	cDNA	Aerobic	0.424028	2.25377	3.46821e-10	1
GSE2037_glu	GEO	affymetrix	Aerobic	0.604656	2.84192	6.45139e-10	1
GSE5239_BL21pOri1_mu0.20	GEO	affymetrix	Aerobic	0.893551	2.09367	1.62594e-09	3
E-MEXP-245_qor	ArrayExpress	cDNA	Aerobic	0.437291	1.33901	1.44765e-09	2
GSE1121_aerobic_oxyR	GEO	affymetrix	Aerobic	0.35834	7.80554	2.2161	3
GSE1121_aerobic_fnr	GEO	affymetrix	Aerobic	0.457048	4.09322	0.00122306	3
GSE3250_ppsA_acetateShift_3h	GEO	cDNA	Aerobic	0.216116	3.06428	1.62274	3
GSE4941_IAA	GEO	p33	Aerobic	0.584977	10.8496	-5.37056e-11	3
E-MEXP-267_wt	ArrayExpress	cDNA	Aerobic	0.788451	-1.29164e-10	2.29158e-11	1
GSE4724_P4Xwildtype_arg	GEO	affymetrix	Aerobic	1.01041	1.18091e-11	-2.63586e-10	3
GSE3437_rpoE_30min	GEO	cDNA	Aerobic	0.591046	6.37143	5.22955e-10	3
GSE2037_ala	GEO	affymetrix	Aerobic	0.159267	16.342	6.20146	1
GSE2037_proline	GEO	affymetrix	Aerobic	0.190977	1.04195	0.986104	1
GSE5239_BL21pOri1_mu0.20	GEO	affymetrix	Aerobic	0.910441	1.33112	-4.70706e-09	3
GSE1121_aerobic_wt	GEO	affymetrix	Aerobic	0.679659	9.42232	1.65309e-10	3
GSE4941_IAA	GEO	p33	Aerobic	0.308011	-9.32832e-11	1.70006e-10	2
GSE4321_rpoH_20min	GEO	cDNA	Aerobic	0.288149	9.5805	18.758	1
GSE3250_ppsA_acetateShift_3h	GEO	cDNA	Aerobic	0.0787922	1.75229	3.37958	2
GSE4724_P4Xwildtype_arg	GEO	affymetrix	Aerobic	0.545128	13.6828	4.87963e-12	2
GSE3250_ppsA_acetateShift_4h	GEO	cDNA	Aerobic	0.231651	8.78386	7.57786	1
GSE3250_ppsA_acetateShift_3h	GEO	cDNA	Aerobic	0.237191	3.87613	2.29401	2
GSE3250_wt_acetateShift_5h	GEO	cDNA	Aerobic	0.917358	1.90074e-11	-4.93835e-11	1
GSE5239_BL21pOri1_mu0.20	GEO	affymetrix	Aerobic	0.470156	5.10697	0.00125814	3
GSE3250_wt_acetateShift_6h	GEO	cDNA	Aerobic	0.195791	2.78335	-1.29262e-08	1
GSE1121_anaerobic_fnr	GEO	affymetrix	Anaerobic	0.950942	6.6203e-11	-2.13873e-10	1
GSE1121_anaerobic_arcA	GEO	affymetrix	Anaerobic	0.922109	-3.55555e-11	1.03148e-10	1
GSE3105_wt2_arabinose	GEO	affymetrix	Aerobic	0.226654	15.9368	1.00605e-11	2
GSE4941_IAA	GEO	p33	Aerobic	0	0	0	2
GSE4724_P4XB2mutant_arg	GEO	affymetrix	Aerobic	0.370638	13.7154	3.9114	2
GSE3250_ppsA_acetateShift_2h	GEO	cDNA	Aerobic	0.157017	1.86729	-1.28263e-09	2
GSE3250_ppsA_acetateShift_3h	GEO	cDNA	Aerobic	0.102269	2.94882	2.17849	2
GSE3250_wt_acetateShift_2h	GEO	cDNA	Aerobic	0.219199	4.05073	4.28651	1
GSE3250_ppsA_acetateShift_2h	GEO	cDNA	Aerobic	0	0	0	2
GSE3250_wt_acetateShift_30min	GEO	cDNA	Aerobic	0.0607956	1.0071	1.374	2
GSE4321_rpoH_10min	GEO	cDNA	Aerobic	0.501777	1.29213	4.68374e-11	1
E-MEXP-267_wt	ArrayExpress	cDNA	Aerobic	0.548669	1.74002	-3.68869e-10	3
GSE1421	GEO	cDNA	Aerobic	0.325086	18.1169	3.16092	3
GSE1421	GEO	cDNA	Aerobic	0	0	0	2
GSE3250_wt_acetateShift_5h	GEO	cDNA	Aerobic	0.388133	5.71664	1.73463	3
GSE4321_rpoH_2.5min	GEO	cDNA	Aerobic	0.81001	2.91122	13.3329	1
GSE3250_wt_acetateShift_5h	GEO	cDNA	Aerobic	0.309727	2.13442	-1.80031e-11	3
GSE3250_wt_acetateShift_2h	GEO	cDNA	Aerobic	0.348952	7.23588e-11	3.21494e-11	3
GSE3905_suspension_7h	GEO	affymetrix	Aerobic	0.651143	1.87751	-2.72877e-10	1
GSE4724_P4XB2mutant_arg	GEO	affymetrix	Aerobic	0.274398	17.7749	6.14057	2
GSE3250_ppsA_acetateShift_15min	GEO	cDNA	Aerobic	0.115518	0.087754	1.29138e-10	2
GSE3905_biofilm_7h	GEO	affymetrix	Aerobic	0.368615	2.89785	-2.9107e-11	1
GSE3250_wt_acetateShift_2h	GEO	cDNA	Aerobic	0.168305	2.82545	5.36362	3
GSE3250_wt_acetateShift_30min	GEO	cDNA	Aerobic	0.0501989	0.87033	0.931496	2
GSE4724_P4XB2mutant_arg	GEO	affymetrix	Aerobic	0.934898	1.84744	6.45299e-10	2
GSE3105_wt1_arabinose_FeSO4	GEO	affymetrix	Aerobic	0.352807	-2.47043e-10	1.14118e-10	2
GSE3105_fur1_arabinose	GEO	affymetrix	Aerobic	0.0834314	6.81619	-5.99021e-10	2
GSE4321_rpoH_0min	GEO	cDNA	Aerobic	0.591729	13.9794	-2.56775e-11	3
GSE3250_wt_acetateShift_2h	GEO	cDNA	Aerobic	0.425806	1.2463	-3.92375e-11	3
E-MEXP-244_HOCl	ArrayExpress	cDNA	Aerobic	0.169439	3.10797	6.03049	2
GSE3250_wt_acetateShift_4h	GEO	cDNA	Aerobic	0	0	0	2
E-MEXP-244_HOCl	ArrayExpress	cDNA	Aerobic	0.598759	4.20585e-10	-9.83349e-10	3
GSE3250_wt_acetateShift_3h	GEO	cDNA	Aerobic	0.168685	2.22535	-1.66159e-12	2
E-MEXP-267_hda	ArrayExpress	cDNA	Aerobic	0	0	0	2
GSE2928_dam	GEO	affymetrix	Aerobic	0	0	0	2
GSE3937_yceP_24h	GEO	affymetrix	Aerobic	0.359016	2.65744	4.39652	1
GSE3250_wt_acetateShift_5min	GEO	cDNA	Aerobic	0.0774566	1.78287	1.21447	2
GSE4321_rpoH_20min	GEO	cDNA	Aerobic	0.318997	4.90844	-4.91244e-11	1
E-MEXP-222_Zn_3	ArrayExpress	cDNA	Aerobic	0.166615	3.16266	15.7342	3
GSE2129_anaeroob_GSNO	GEO	cDNA	Anaerobic	0.527818	3.50054	1.44852	1
GSE5239_BL21_mu0.46	GEO	affymetrix	Aerobic	0.474312	6.36438	4.32892	3
GSE1121_aerobic_arcAfnr	GEO	affymetrix	Aerobic	0.417215	10.1257	10.8514	3
GSE3591_anaerobic_narXLP_NO2	GEO	cDNA	Anaerobic	0.366935	18.1265	2.55804	3
GSE3250_wt_acetateShift_3h	GEO	cDNA	Aerobic	0	0	0	2
GSE4941_untreated	GEO	p33	Aerobic	0.332349	2.64688	1.98614	3
E-MEXP-222_Zn_2	ArrayExpress	cDNA	Aerobic	0.374715	2.64247	4.22862	1
GSE3905_biofilm_15h	GEO	affymetrix	Aerobic	0.42947	6.8605	4.38979e-10	2
GSE4321_rpoH_10min	GEO	cDNA	Aerobic	0.31996	1.12433	1.10835e-11	1
GSE2037_succ	GEO	affymetrix	Aerobic	0.433007	10.3171	0.00115873	1
E-MEXP-245_qor	ArrayExpress	cDNA	Aerobic	0.433142	3.32574e-10	1.23121e-10	1
GSE1121_aerobic_appY	GEO	affymetrix	Aerobic	0.529401	2.85388	-6.36801e-11	3
GSE3105_fur2_arabinose	GEO	affymetrix	Aerobic	0.133236	5.47465	2.73504	2
GSE3591_anaerobic_wt	GEO	cDNA	Anaerobic	0.259144	2.48276	-2.59068e-10	1
GSE533_temperatureEvolved_line1	GEO	p33	Aerobic	0.143319	0.476674	0.00038352	2
GSE3591_aerobic_wt	GEO	cDNA	Aerobic	0.240063	11.1465	11.9964	3
GSE3250_wt_acetateShift_5min	GEO	cDNA	Aerobic	0.282637	2.57185	-2.69754e-11	1
GSE4941_untreated	GEO	p33	Aerobic	0.441293	5.7301e-10	6.3268e-12	1
E-MEXP-267_seqA	ArrayExpress	cDNA	Aerobic	0.298862	5.194	1.06375e-10	1
GSE1121_aerobic_arcAfnr	GEO	affymetrix	Aerobic	0.316719	8.44269	4.52222	3
GSE4511_aerobic_pH8.7	GEO	affymetrix	Aerobic	0	0	0	2
GSE4706_500hours	GEO	cDNA	Aerobic	0.149229	1.78857	-1.6704e-09	1
E-MEXP-267_seqA	ArrayExpress	cDNA	Aerobic	0.319089	17.4676	-7.93457e-11	3
GSE1121_anaerobic_arcA	GEO	affymetrix	Anaerobic	0.94322	-2.64251e-11	-1.33287e-11	3
GSE533_ancestor	GEO	p33	Aerobic	0.167924	3.05245	2.48786	1
GSE2037_gly	GEO	affymetrix	Aerobic	0.109886	2.26996	30.4553	1
GSE4941_untreated	GEO	p33	Aerobic	0.74954	2.48091	9.59449	1
GSE2928_dam_mutS	GEO	affymetrix	Aerobic	0.19614	4.33895	0.000524873	2
GSE1121_aerobic_soxS	GEO	affymetrix	Aerobic	0.629269	4.93213	4.91229	3
GSE4511_aerobic_pH8.7	GEO	affymetrix	Aerobic	0.258345	1.472e-09	3.6941e-10	3
GSE1780_0mMCopper	GEO	cDNA	Aerobic	0.12478	20.7427	9.2814	2
GSE1780_0mMCopper	GEO	cDNA	Aerobic	0.125822	13.141	2.6543e-10	2
GSE2037_glu	GEO	affymetrix	Aerobic	0.921945	-3.72639e-10	-9.89808e-10	1
GSE2928_wt	GEO	affymetrix	Aerobic	1.00888	5.97244e-11	4.79323e-11	3
GSE1121_anaerobic_oxyR	GEO	affymetrix	Anaerobic	0.818093	-6.52661e-11	3.16177e-10	3
GSE1121_aerobic_oxyR	GEO	affymetrix	Aerobic	0.333727	8.78342	5.96841	1
GSE3437_rpoE_20min	GEO	cDNA	Aerobic	0.288298	1.37961	-2.83965e-11	3
GSE4941_untreated	GEO	p33	Aerobic	0.288729	1.16452	-8.69945e-10	2
GSE3591_anaerobic_narXL_NO2	GEO	cDNA	Anaerobic	0.386252	13.1278	4.06441	1
GSE1121_anaerobic_appY	GEO	affymetrix	Anaerobic	0.944206	2.40661e-11	1.80564e-11	3
GSE4511_aerobic_pH8.7	GEO	affymetrix	Aerobic	0.282206	2.32163	-6.06664e-11	2
GSE533_temperatureEvolved_line2	GEO	p33	Aerobic	0.126528	3.45973	3.60885	2
GSE4706_40hours	GEO	cDNA	Aerobic	0.308912	0.696888	-3.12963e-09	1
GSE2037_acetate	GEO	affymetrix	Aerobic	0.181916	4.5534	4.16214e-10	1
GSE2928_dam	GEO	affymetrix	Aerobic	0.226	-3.75002e-11	21.2822	2
GSE1121_anaerobic_wt	GEO	affymetrix	Anaerobic	0.743003	-1.91804e-10	2.02031e-11	3
GSE3250_ppsA_acetateShift_30min	GEO	cDNA	Aerobic	0.0894029	0.703317	5.57181e-12	2
GSE4941_untreated	GEO	p33	Aerobic	0	0	0	2
GSE3591_anaerobic_fnr_NO3	GEO	cDNA	Anaerobic	0.333052	4.10768	0.000891252	3
GSE1780_075mMCopper	GEO	cDNA	Aerobic	0.144715	21.5734	0.888502	2
GSE3591_anaerobic_wt	GEO	cDNA	Anaerobic	0.923224	3.22296e-10	-1.10129e-09	3
GSE1780_075mMCopper	GEO	cDNA	Aerobic	0.525866	15.441	1.18278e-10	2
GSE3591_anaerobic_wt_NO3	GEO	cDNA	Anaerobic	0.35582	8.10832	1.3023	1
GSE1780_0mMCopper	GEO	cDNA	Aerobic	0.234203	20.9721	1.48755	3
E-MEXP-222_Zn_2	ArrayExpress	cDNA	Aerobic	0.082789	1.86025	19.9886	2
GSE1121_anaerobic_fnr	GEO	affymetrix	Anaerobic	0.916813	-1.07141e-10	4.08583e-10	1
GSE1121_anaerobic_arcAfnr	GEO	affymetrix	Anaerobic	0.876376	1.73096	-2.45504e-10	1
GSE1121_aerobic_appY	GEO	affymetrix	Aerobic	0.789435	6.41536	1.50272	3
GSE3437_rpoE_10min	GEO	cDNA	Aerobic	0.374713	3.53086	1.07504e-10	1
GSE3437_rpoE_60min	GEO	cDNA	Aerobic	0.293999	3.68848	18.7855	1
GSE4511_aerobic_pH8.7	GEO	affymetrix	Aerobic	0	0	0	2
GSE2928_mutS	GEO	affymetrix	Aerobic	0.75353	4.90919	0.00201645	1
GSE3437_rpoE_2.5min	GEO	cDNA	Aerobic	0.954975	0.590647	8.9648e-11	3
GSE3591_anaerobic_fnr_NO3	GEO	cDNA	Anaerobic	0.602641	-4.15431e-10	1.39136e-10	3
GSE3591_aerobic_fnr	GEO	cDNA	Anaerobic	0.414664	3.36818	1.43949	3
GSE3591_anaerobic_wt_NO3	GEO	cDNA	Anaerobic	0.602825	3.72239	-5.96951e-10	1
GSE3250_ppsA_acetateShift_2h	GEO	cDNA	Aerobic	0	0	0	2
GSE3591_aerobic_fnr	GEO	cDNA	Anaerobic	0.388303	3.1024	1.47596	3
E-MEXP-584_pat1	ArrayExpress	affymetrix	Aerobic	0.627958	9.80584	1.24693e-09	1
GSE6444_rseA	GEO	cDNA	Aerobic	0.175368	3.12453	7.21538	2
GSE8540_cysB_GSNO500_5min	GEO	cDNA	Aerobic	1.00002	-3.68467e-10	2.49886e-10	1
GSE4394_RNaseE_N_rif_1.5min	GEO	cDNA	Aerobic	0.478247	15.9546	1.48759e-11	3
GSE7573_norR_MOPS_DeaNO_5min	GEO	cDNA	Aerobic	0.419637	17.5929	7.88324e-11	1
GSE9203_isrR	GEO	affymetrix	Aerobic	0.161196	2.6638	0.694895	3
E-MEXP-732_p5_g21	ArrayExpress	affymetrix	Aerobic	0.964574	-7.53131e-11	-6.22057e-11	3
GSE9_lexA_UV_40	GEO	cDNA	Aerobic	0.529693	-3.87805e-10	2.41319e-11	3
GSE4556_ph8.5	GEO	affymetrix	Aerobic	0.308117	3.95084	1.89564	2
GSE6781_pGIT8_NO2	GEO	cDNA	Aerobic	0.372443	15.7454	9.07e-11	3
GSE5981_rsd_overexpr_OD0.9	GEO	cDNA	Aerobic	0.529461	7.11737	12.0133	3
GSE4778_t5_ph5.5	GEO	affymetrix	Aerobic	0.939044	0.148002	2.11334e-10	3
GSE7573_arcA_MOPS_DeaNO_5min	GEO	cDNA	Aerobic	0.915066	-1.00836e-11	-1.11887e-10	1
GSE6992_soxR_paraquat_t8	GEO	affymetrix	Aerobic	0.186761	8.0822	3.41364	2
GSE4394_wt_rif_6min	GEO	cDNA	Aerobic	0.652338	3.55017	3.64437	1
GSE7398_wt_240	GEO	affymetrix	Aerobic	0.116413	2.03729	-1.8455e-10	2
GSE9388_4h	GEO	affymetrix	Aerobic	0.467902	7.97054	20.4107	1
GSE8540_flhDC_GSNO500_5min	GEO	cDNA	Aerobic	0.380417	7.21843	1.11724	3
E-MEXP-732_empty	ArrayExpress	affymetrix	Aerobic	0.484929	2.38264	6.21266	1
GSE7243_wt	GEO	affymetrix	Aerobic	0.297681	2.7995	0.000796595	3
GSE6425_MG1655_aerobic_8	GEO	affymetrix	Aerobic	0.12817	1.76582	9.16922e-10	2
GSE4778_t10_ph5.5	GEO	affymetrix	Aerobic	0.94599	-3.87154e-12	-4.37733e-11	3
GSE6609_D3_aerobic_lon	GEO	cDNA	Aerobic	0.303737	1.3514	6.23261	2
GSE6425_UTI89_aerobic_19.5	GEO	affymetrix	Aerobic	0.096463	1.56678	0.470468	2
GSE8540_flhDC_GSNO500_5min	GEO	cDNA	Aerobic	0.716639	6.62693	-2.05108e-11	1
GSE4556_ph5.7	GEO	affymetrix	Aerobic	0.774318	0.446325	2.3141e-10	1
GSE7265_WT_tp15	GEO	cDNA	Aerobic	0.325586	2.26384	3.57574	1
GSE8965_SA_tp4	GEO	cDNA	Aerobic	0.301732	3.10756	6.68593	1
GSE3665_mut2_0g/l_etOH	GEO	affymetrix	Aerobic	0.317834	4.42888	-4.50549e-10	2
GSE3123_rne_pBADRNE_noIPTG	GEO	cDNA	Aerobic	0.361143	4.141	4.86424e-10	3
GSE7265_WT_tp4	GEO	cDNA	Aerobic	0.945623	7.81835e-12	-2.17664e-11	3
E-MEXP-926_urine_83972	ArrayExpress	affymetrix	Aerobic	0.337016	13.7338	2.19524	2
GSE6425_UTI89_aerobic_12	GEO	affymetrix	Aerobic	0.114718	1.64404	0.351961	2
GSE8540_metJ_GSNO500_5min	GEO	cDNA	Aerobic	0.964028	7.82027e-11	-1.62558e-10	3
GSE8965_FA_tp4	GEO	cDNA	Aerobic	0.223439	4.73454	18.7704	2
E-MEXP-1166_MGAdp_glu1000g	ArrayExpress	cDNA	Aerobic	0.969278	2.46902e-11	-3.12314e-10	3
GSE6425_UTI89_anaerobic_2.5	GEO	affymetrix	Anaerobic	0.498034	10.9111	9.50756	3
E-MEXP-1166_MGAdp_glu1000g	ArrayExpress	cDNA	Aerobic	0.756146	6.55948	7.31777	2
E-MEXP-953_T20_K12_Stationary_planktonic_F+Lampda+	ArrayExpress	affymetrix	Aerobic	0.742706	-2.8016e-10	4.86579	2
E-MEXP-953_T48_MG1655+pBR322_Biofilm_biofilm_F_lambda_ilvG_rfb_50_rph_1	ArrayExpress	affymetrix	Aerobic	0.247683	2.0603e-08	-1.80741e-09	2
GSE6712_benzalkonium_chloride	GEO	p33	Aerobic	0.281612	0.621899	5.878	2
GSE11087_wt_ile	GEO	affymetrix	Aerobic	1.00984	7.58961e-12	-6.73405e-11	2
GSE7_10ug/ml_indaa_15min	GEO	cDNA	Aerobic	0.167422	10.6451	2.39006	3
E-MEXP-953_T10_K12_Exponiential_planktonic_F+Lampda+	ArrayExpress	affymetrix	Aerobic	0	0	0	2
GSE1154_DH5alpha_F_plasmid	GEO	affymetrix	Aerobic	0.0639047	0.990141	0.360422	2
GSE6425_UTI89_anaerobic_4	GEO	affymetrix	Anaerobic	0.129332	1.16906	9.38738e-10	2
GSE7_10ug/ml_indaa_30min	GEO	cDNA	Aerobic	0.375914	4.20811	1.8561	1
GSE6426_MG1655	GEO	affymetrix	Aerobic	0	0	0	2
GSE3283_Irp_leucine	GEO	cDNA	Aerobic	0.405645	17.1093	3.95831	1
GSE8965_FA_tp2	GEO	cDNA	Aerobic	0.431424	-9.36425e-11	4.12574e-12	1
E-MEXP-1166_MGStat_prolonged_stat_phase_37d	ArrayExpress	cDNA	Aerobic	0.440119	2.26118	2.10359e-10	1
GSE9814_wt	GEO	affymetrix	Aerobic	1.00976	7.73627e-11	-3.17503e-11	2
GSE7265_WT_tp1	GEO	cDNA	Aerobic	1.01069	-1.34548e-10	5.58767e-11	1
E-MEXP-1166_DHStat_prolonged_stat_phase_37d	ArrayExpress	cDNA	Aerobic	0.196682	3.69349	35.3323	3
E-MEXP-953_T10_MG1655_Exponiential_planktonic_F_lambda_ilvG_rfb_50_rph_1	ArrayExpress	affymetrix	Aerobic	0	0	0	2
GSE6923_BW25113_wt_24_LB	GEO	affymetrix	Aerobic	0.952514	1.34462e-11	3.47141e-11	1
GSE5098_anaeroob_NOC5/7	GEO	cDNA	Anaerobic	0.261041	2.14169	-1.57712e-10	1
GSE4394_rhlB_rif_4.5min	GEO	cDNA	Aerobic	0.510878	15.009	4.8989e-10	1
GSE7573_argR_MOPS_DeaNO_5min	GEO	cDNA	Aerobic	0.68135	-1.59835e-10	5.66108e-10	3
GSE8540_wt_DPTA_5min	GEO	cDNA	Aerobic	1.01024	1.38966e-11	-8.00506e-11	2
GSE4778_t0_ph7.6	GEO	affymetrix	Aerobic	0.989629	-5.35258e-11	1.13092e-10	3
GSE6923_ATCC25404_wt_24_LB	GEO	affymetrix	Aerobic	0.808043	5.20056	-7.35035e-12	1
GSE4394_eno_rif_6min	GEO	cDNA	Aerobic	0.69454	5.27952e-11	-1.12089e-12	1
GSE4394_wt_rif_6min	GEO	cDNA	Aerobic	0.862817	-3.01708e-11	3.167e-11	3
GSE8965_FA_tp3	GEO	cDNA	Aerobic	0.182349	2.86669	1.09779	1
E-MEXP-584_pat2	ArrayExpress	affymetrix	Aerobic	0.604201	10.3892	-1.2633e-09	1
GSE4556_ph7.0	GEO	affymetrix	Aerobic	1.01033	1.98558e-10	-4.98847e-10	2
GSE7265_WT_tp3	GEO	cDNA	Aerobic	0.993069	-7.00414e-13	-1.57834e-12	1
GSE7398_fis_240	GEO	affymetrix	Aerobic	0.165538	2.90894	-4.60218e-10	1
GSE8540_metJ_GSNO500_5min	GEO	cDNA	Aerobic	0.649379	-1.95479e-11	1.27935e-10	2
GSE4394_RNaseE_N	GEO	cDNA	Aerobic	0.181521	3.83871	2.99988	1
GSE6992_wt_paraquat_t0	GEO	affymetrix	Aerobic	0.885433	-4.76969e-10	1.0458e-10	1
GSE8965_SA_tp2	GEO	cDNA	Aerobic	0.258473	2.06168	6.52434e-11	1
GSE6712_benzalkonium_chloride	GEO	p33	Aerobic	0.316747	17.0139	2.50236	2
E-MEXP-1166_MGAdp_glu1000g	ArrayExpress	cDNA	Aerobic	0.475109	2.44056	0.00127139	1
E-MEXP-910_MG_kan_tos_N15	ArrayExpress	affymetrix	Aerobic	0.714578	6.71066	-3.57805e-12	1
GSE6425_UTI89_aerobic_2.5	GEO	affymetrix	Aerobic	0.472333	10.3912	5.08567	3
GSE5098_norR_anaeroob_NOC5/7	GEO	cDNA	Anaerobic	0.277047	1.5384	23.175	1
GSE4394_RNaseE_N_rif_6min	GEO	cDNA	Aerobic	0.941724	3.51153e-11	-1.32957e-11	1
GSE4556_ph8.5	GEO	affymetrix	Aerobic	0.404194	1.86525	-5.81248e-11	2
GSE7398_wt_90	GEO	affymetrix	Aerobic	0.189645	2.81627	-3.48103e-10	3
GSE6444_hfq_rpoEinduced_IPTG	GEO	cDNA	Aerobic	0.838946	3.0783	-3.13059e-11	1
GSE7265_WT_tp11	GEO	cDNA	Aerobic	0.464728	15.2436	2.9429e-11	3
GSE3665_mut3_0g/l_etOH	GEO	affymetrix	Aerobic	0	0	0	2
GSE7573_nsrR_hmpA_MOPS_DeaNO_5min	GEO	cDNA	Aerobic	0	0	0	2
GSE4394_rhlB	GEO	cDNA	Aerobic	0.812176	0.912017	-4.90286e-10	2
GSE3123_rne_pNRNE5	GEO	cDNA	Aerobic	0.291988	6.07846	5.44448	1
GSE6444_hfq	GEO	cDNA	Aerobic	0.975792	-2.97724e-11	3.50893e-11	1
E-MEXP-732_p5	ArrayExpress	affymetrix	Aerobic	0.91452	0.0652326	3.3442e-11	3
GSE6426_UTI89	GEO	affymetrix	Aerobic	0	0	0	2
GSE4394_eno_rif_1.5min	GEO	cDNA	Aerobic	0.0926979	8.80779	3.00532	2
GSE8540_wt_GSNO500_5min	GEO	cDNA	Aerobic	0.603482	-2.50385e-11	5.50794	2
GSE7_30min	GEO	cDNA	Aerobic	0.415922	2.20033	3.754	3
GSE6444_rpoEinduced_IPTG	GEO	cDNA	Aerobic	0.406175	10.5707	3.22426	1
GSE7_trpA46PR9_tnaA2	GEO	cDNA	Aerobic	0.19965	1.40809	0.000534255	2
GSE9_UV_5	GEO	cDNA	Aerobic	0.664745	10.0881	8.02714	3
GSE6609_D1_anaerobic	GEO	cDNA	Anaerobic	0.91839	-3.58149e-12	7.66458e-11	2
E-MEXP-732_p5	ArrayExpress	affymetrix	Aerobic	0.951105	-4.4719e-11	1.22622e-11	3
GSE4394_pnp_rif_6min	GEO	cDNA	Aerobic	0.94358	2.33621e-12	1.08726e-11	3
GSE4569_1h_UV	GEO	cDNA	Aerobic	0.052364	0.926302	4.09232	2
GSE8965_FA_tp4	GEO	cDNA	Aerobic	0.236968	2.36989	0.000634127	1
GSE8540_met_suppl_GSNO500_5min	GEO	cDNA	Aerobic	0.957915	3.25441e-11	-2.86962e-11	2
GSM532_60min	GEO	cDNA	Aerobic	0.0566123	23.5432	1.87948	2
GSE6609_D1_aerobic_lon	GEO	cDNA	Aerobic	0.237375	3.97611	-2.26871e-09	2
GSE7265_WT_tp7	GEO	cDNA	Aerobic	0.985812	-1.40721e-11	-2.30008e-11	1
GSE2140_tet_inducible_sig32_t5	GEO	affymetrix	Aerobic	0.10736	0.259618	4.62032	2
GSE8965_FA_tp2	GEO	cDNA	Aerobic	0.585624	11.6842	-1.1344e-12	3
GSE7265_WT_tp17	GEO	cDNA	Aerobic	0.270335	21.0129	-3.23823e-12	1
E-MEXP-1166_MGStat_prolonged_stat_phase_37d	ArrayExpress	cDNA	Aerobic	0.195953	0.126602	6.54605e-11	2
GSE7265_WT_tp7	GEO	cDNA	Aerobic	0.451338	3.30547	5.53995	1
GSE7_15ug/ml_indaa_5min	GEO	cDNA	Aerobic	0.105029	10.6878	2.94159	2
GSE9203_isrK	GEO	affymetrix	Aerobic	0.272674	1.31496	8.23731e-10	2
GSE7265_WT_tp10	GEO	cDNA	Aerobic	0.39426	18.3328	-2.85435e-10	1
GSE6444_rseA	GEO	cDNA	Aerobic	0.196216	4.58185	2.29109	1
GSE8540_wt_DPTA_5min	GEO	cDNA	Aerobic	0.712434	9.37704	5.28257	2
GSE7573_metJ_MOPS_DeaNO_5min	GEO	cDNA	Aerobic	0.080958	8.19637	9.41229	2
E-MEXP-926_urine_biofilm_83972	ArrayExpress	affymetrix	Aerobic	0.20484	4.18092	5.49014e-08	2
GSE7573_wt_MOPS_DeaNO_5min	GEO	cDNA	Aerobic	0.993709	-3.63278e-12	-6.81182e-12	2
GSE4383_ara_KSL2009	GEO	cDNA	Aerobic	0.36148	7.21914	4.77732	1
GSE6712_benzalkonium_chloride+50ppm	GEO	p33	Aerobic	0.349256	15.2857	2.54695	2
GSE4778_t10_ph5.5	GEO	affymetrix	Aerobic	0.947546	1.60672e-10	3.89174e-12	3
GSE6781_pGIT8_NO2	GEO	cDNA	Aerobic	0.284095	2.7147	0.592837	2
E-MEXP-1166_DHAdp_glu1000g	ArrayExpress	cDNA	Aerobic	0.91349	-4.40409e-11	-6.24475e-12	1
E-MEXP-953_T48_MG1655+pBR322_Biofilm_biofilm_F_lambda_ilvG_rfb_50_rph_1	ArrayExpress	affymetrix	Aerobic	1.01056	1.36356e-11	-2.68188e-11	3
E-MEXP-953_T20_K12_Stationary_planktonic_F+Lampda+	ArrayExpress	affymetrix	Aerobic	0	0	0	2
GSE9388_4.5h	GEO	affymetrix	Aerobic	0.35497	20.6082	-5.72513e-11	3
GSE8540_dpp_GSNO100_5min	GEO	cDNA	Aerobic	0.92069	5.44303e-13	4.31701e-11	3
GSE5981_rsd_overexpr_OD0.4	GEO	cDNA	Aerobic	0.445543	17.6188	-6.62957e-11	1
GSE8540_cys_suppl_GSNO500_5min	GEO	cDNA	Aerobic	0.275203	7.3314	1.26423	3
GSE3665_mut3_20g/l_etOH	GEO	affymetrix	Aerobic	0.40278	6.1371	1.31177e-09	2
GSE7243_phoU	GEO	affymetrix	Aerobic	0	0	0	2
GSE6425_MG1655_aerobic_12	GEO	affymetrix	Aerobic	0.120728	1.64158	1.61458e-10	2
GSE6444_rseA	GEO	cDNA	Aerobic	0.341172	6.44369	18.8005	3
GSE8540_nsrR_GSNO500_5min	GEO	cDNA	Aerobic	1.01046	-5.48683e-12	9.38748e-11	3
E-MEXP-926_urine_VR50	ArrayExpress	affymetrix	Aerobic	0.953646	-2.41968e-10	3.40278e-10	1
GSE4394_pnp	GEO	cDNA	Aerobic	0.373112	0.710532	2.37052e-11	3
GSE8965_FA_tp1	GEO	cDNA	Aerobic	0.135589	8.97261	2.73398e-11	2
GSE7265_WT_tp14	GEO	cDNA	Aerobic	0.258092	6.83958	1.51042	3
E-MEXP-1001_suspension_stat	ArrayExpress	affymetrix	Aerobic	0.376605	2.65128	5.86306e-11	1
GSE6425_UTI89_anaerobic_3	GEO	affymetrix	Anaerobic	0.314913	7.42423	1.68908	3
GSE4394_rhlB	GEO	cDNA	Aerobic	0.488746	8.9949	1.59426	3
GSE4394_RNaseE_N_rif_1.5min	GEO	cDNA	Aerobic	0.844709	5.84695	-6.37472e-11	3
GSE7265_WT_tp4	GEO	cDNA	Aerobic	0.971671	-2.03042e-11	-4.36831e-12	3
GSE6425_MG1655_anaerobic_3.75	GEO	affymetrix	Anaerobic	0.103344	1.49762	5.05872e-10	2
GSE6712_benzalkonium_chloride	GEO	p33	Aerobic	0.295263	14.1477	2.86711	2
GSE11087_relA_spoT_ile_starvation	GEO	affymetrix	Aerobic	0.142095	3.00253	1.5486	2
GSE9_lexA	GEO	cDNA	Aerobic	0.749652	7.93309	4.18425	3
GSE8965_FA_tp4	GEO	cDNA	Aerobic	0.421007	2.98187	-2.34482e-11	3
GSE7573_wt_MOPS_DeaNO_5min	GEO	cDNA	Aerobic	0.918586	-5.20327e-11	4.98794e-11	1
GSE4569_1h_UV	GEO	cDNA	Aerobic	0.0880947	10.7226	-4.69906e-10	2
GSE6426_MG1655	GEO	affymetrix	Aerobic	0.602987	13.6496	4.56091e-10	3
GSE4394_eno_rif_4.5min	GEO	cDNA	Aerobic	0.234628	4.77407	0.94644	1
GSE7265_WT_tp6	GEO	cDNA	Aerobic	0.313922	6.62239	-2.16048e-11	1
E-MEXP-584_pat2	ArrayExpress	affymetrix	Aerobic	0.773716	4.2306	0.00207046	1
E-MEXP-1177_glucose	ArrayExpress	affymetrix	Aerobic	0.782073	-6.84655e-12	2.71144e-11	2
GSE7573_iscR_MOPS_DeaNO_5min	GEO	cDNA	Aerobic	1.00409	-3.57514e-11	1.22664e-11	1
GSE6425_UTI89_anaerobic_6	GEO	affymetrix	Anaerobic	0.120373	1.78679	0.429881	2
GSE3665_wt	GEO	affymetrix	Aerobic	0.913606	-4.19438e-11	4.95234e-12	3
GSE4778_t1_ph5.5	GEO	affymetrix	Aerobic	0.809028	1.95874	0.00216496	3
GSE4394_RNaseE_N	GEO	cDNA	Aerobic	0.170926	3.50589	2.75353	1
GSE7265_WT_tp16	GEO	cDNA	Aerobic	0.418688	7.4443	3.47507	1
GSE9814_rpoS	GEO	affymetrix	Aerobic	0.634489	12.7172	8.50195e-10	2
GSE7265_WT_tp6	GEO	cDNA	Aerobic	0.312133	2.19528	3.88843	1
GSE8706_yncC_colony	GEO	affymetrix	Aerobic	0.754553	7.58937	3.20528	2
GSE7573_wt_MOPS_methionine_DeaNO_5min	GEO	cDNA	Aerobic	0.985904	-2.37728e-10	2.40545e-11	1
GSE4778_t1_ph5.5	GEO	affymetrix	Aerobic	0.644144	2.17967	0.00172373	2
GSE5098_anaeroob_NOC5/7	GEO	cDNA	Anaerobic	0.285791	3.28711	3.55978e-10	1
E-MEXP-732_p5_g21	ArrayExpress	affymetrix	Aerobic	1.01054	2.75079e-10	2.13481e-09	3
GSE8540_wt_DPTA_5min	GEO	cDNA	Aerobic	0.542883	14.9433	1.94808e-10	2
GSE6923_MG1655_wt_24_M9	GEO	affymetrix	Aerobic	0.940583	-3.48254e-12	7.69509e-12	1
GSE4394_wt_rif_1.5min	GEO	cDNA	Aerobic	0.900713	-1.74004e-11	-9.7637e-11	2
GSE3665_mut2_0g/l_etOH	GEO	affymetrix	Aerobic	0	0	0	2
GSE6992_wt_paraquat_t4	GEO	affymetrix	Aerobic	0.539238	0.206844	5.68144e-11	1
GSE4394_wt_rif_4.5min	GEO	cDNA	Aerobic	0.73167	1.5327	1.19764e-11	2
GSE7398_fis_90	GEO	affymetrix	Aerobic	0.343649	3.6369	-1.95115e-10	3
GSE7_trpEA2_trpR2_50ug/ml	GEO	cDNA	Aerobic	0.192469	3.39339	4.31991e-10	3
GSE5177_cueO	GEO	cDNA	Aerobic	0.466121	5.1897	0.00124734	1
GSE8965_SA_tp3	GEO	cDNA	Aerobic	0.354512	7.2997	4.93504	3
GSE6712_benzalkonium_chloride+50ppm	GEO	p33	Aerobic	0.258872	1.35999	1.44134	2
GSE7265_WT_tp2	GEO	cDNA	Aerobic	0.999201	-6.94632e-12	3.48925e-11	1
GSE6425_UTI89_aerobic_5	GEO	affymetrix	Aerobic	0.154186	2.25921	1.40109e-08	2
GSE8540_metJ_GSNO500_5min	GEO	cDNA	Aerobic	0.97642	2.16662e-11	4.00778e-11	2
GSE6712_control	GEO	p33	Aerobic	0.442044	13.1626	-2.34348e-10	1
GSE4556_ph8.5	GEO	affymetrix	Aerobic	0	0	0	2
GSE7398_wt_240	GEO	affymetrix	Aerobic	0.150748	2.40869	1.07318e-10	1
GSE9755_1perc_tannine	GEO	affymetrix	Aerobic	0.384508	0.832123	9.59109e-10	1
GSE5098_norR_anaeroob_NOC5/7	GEO	cDNA	Anaerobic	0.0421135	1.7541	8.26036	2
GSE6426_UTI89	GEO	affymetrix	Aerobic	0.656943	10.2045	5.9882	2
GSE7398_fis_240	GEO	affymetrix	Aerobic	0.165004	2.67289	-3.92692e-10	1
GSE7265_WT_tp10	GEO	cDNA	Aerobic	0.53391	14.5501	-2.39814e-10	1
GSE7573_nsrR_hmpA_MOPS_DeaNO_5min	GEO	cDNA	Aerobic	0.965368	8.30513e-13	2.22773e-11	3
E-MEXP-926_urine_VR50	ArrayExpress	affymetrix	Aerobic	0.950826	-9.7863e-12	3.38485e-11	1
GSE8706_wt_biofilm	GEO	affymetrix	Aerobic	0.390414	3.22634	0.00104475	1
GSE6609_D1_anaerobic_lon	GEO	cDNA	Anaerobic	0.634519	2.86407	21.9677	1
GSE8540_wt_GSNO500_5min	GEO	cDNA	Aerobic	0.805552	1.47714e-10	10.2267	3
GSE6444_hfq	GEO	cDNA	Aerobic	0.398458	3.00189	-1.60043e-11	1
GSE7573_wt_MOPS_DeaNO_5min	GEO	cDNA	Aerobic	0.973022	-3.92985e-11	4.00475e-11	1
E-MEXP-926_MOPS_glucose_83972	ArrayExpress	affymetrix	Aerobic	0.170049	16.4138	0.821144	3
GSE3665_mut1_0g/l_etOH	GEO	affymetrix	Aerobic	0.284691	4.4809	-2.65346e-09	2
GSE6609_D1_aerobic_lon	GEO	cDNA	Aerobic	0.300922	-4.41519e-10	-9.23295e-10	1
GSE7265_WT_tp13	GEO	cDNA	Aerobic	0.553183	14.4852	-1.32819e-11	1
GSE6444_hfq	GEO	cDNA	Aerobic	0.943344	2.12013	0.0025244	1
GSE6609_D1_anaerobic_lon	GEO	cDNA	Anaerobic	0.17628	20.4977	9.86994	3
E-MEXP-1001_biofilm	ArrayExpress	affymetrix	Aerobic	0.303859	8.92637	2.38142	1
GSE7439_luxS	GEO	affymetrix	Aerobic	0.167618	-1.59209e-10	3.70351e-11	2
GSE8540_wt_GSNO100_5min	GEO	cDNA	Aerobic	1.0018	-1.03112e-09	9.01374e-10	3
GSE4394_rhlB_rif_1.5min	GEO	cDNA	Aerobic	0.962173	4.37165e-11	7.0581e-11	3
GSE8965_SA_tp2	GEO	cDNA	Aerobic	0.184003	1.1524	4.01176e-10	1
E-MEXP-1166_DHAdp_glu1000g	ArrayExpress	cDNA	Aerobic	0.545727	2.37642	16.8836	1
GSE4562_yceB_glucose_indole	GEO	affymetrix	Aerobic	0.572083	-9.88881e-11	4.94146e-11	1
GSE4394_wt_rif_1.5min	GEO	cDNA	Aerobic	0.97514	9.51585e-11	-1.26e-10	3
GSE6296_HEPES	GEO	cDNA	Aerobic	0.40959	2.42862	4.98871	3
E-MEXP-1166_MGAdp_glu1000g	ArrayExpress	cDNA	Aerobic	0.540758	4.90739	-2.66451e-09	1
E-MEXP-1001_art_mating_F_phenocopy	ArrayExpress	affymetrix	Aerobic	0.175783	2.01804	-3.42284e-10	1
GSE7265_WT_tp9	GEO	cDNA	Aerobic	1.01067	4.96265e-11	9.03223e-11	1
GSE7573_MOPS_SeOh_5min	GEO	cDNA	Aerobic	0.974886	1.81646e-12	7.08354e-11	3
GSE6992_wt_paraquat_t4	GEO	affymetrix	Aerobic	1.01021	-4.45927e-11	9.39357e-11	2
GSE7573_metJ_MOPS_DeaNO_5min	GEO	cDNA	Aerobic	0.432947	3.92467	9.59581e-09	1
GSE4394_pnp_rif_3min	GEO	cDNA	Aerobic	0.933328	-2.41953e-11	-2.62432e-11	2
E-MEXP-720_crl	ArrayExpress	cDNA	Aerobic	0.548841	8.74229	23.3379	2
GSE9388_5.5h	GEO	affymetrix	Aerobic	0.95284	-2.52503e-12	1.87274e-11	2
GSE6781_pGIT1	GEO	cDNA	Aerobic	0.3152	15.1773	7.33705	3
GSE4394_wt_rif_6min	GEO	cDNA	Aerobic	0.806872	3.89606	0.00215919	1
GSE6425_MG1655_anaerobic_2.5	GEO	affymetrix	Anaerobic	0.21549	2.44267	0.000576652	1
GSE6781_pGIT1_NO2	GEO	cDNA	Aerobic	0.438631	2.79426	0.249064	2
GSE4394_wt_rif_6min	GEO	cDNA	Aerobic	0.571262	2.52697	-1.50643e-10	3
GSE6444_rseA	GEO	cDNA	Aerobic	0.644202	10.3944	9.04513	3
GSE8540_nsrR_GSNO500_5min	GEO	cDNA	Aerobic	0.111899	10.4857	9.2197e-11	2
GSE7573_norR_MOPS_DeaNO_5min	GEO	cDNA	Aerobic	0.495628	16.5206	6.50999e-11	3
GSE7398_fis_90	GEO	affymetrix	Aerobic	0.334538	5.10438	-3.4634e-09	2
GSE6609_D1_aerobic	GEO	cDNA	Aerobic	0.795736	6.22547	-5.79963e-11	1
GSE4394_pnp_rif_1.5min	GEO	cDNA	Aerobic	0.975486	-3.12928e-11	-6.58307e-11	3
GSE7_15ug/ml_indaa_30min	GEO	cDNA	Aerobic	0.117331	4.55983	2.82835e-11	2
GSE1154_MG1655	GEO	affymetrix	Aerobic	0.142515	9.92067	2.77104e-11	3
GSE4394_wt_rif_6min	GEO	cDNA	Aerobic	0.932888	-2.2655e-10	5.76057e-10	1
E-MEXP-732_p23_g9	ArrayExpress	affymetrix	Aerobic	0.834429	-2.53495e-11	-3.6731e-11	3
E-TABM-103_t3.1	ArrayExpress	affymetrix	Aerobic	0.415659	17.8759	6.58112e-12	3
GSE5177_cueO	GEO	cDNA	Aerobic	0.596373	4.96591	0.00159589	1
GSE5981_rsd_overexpr_OD1.1	GEO	cDNA	Aerobic	0.70456	9.49445	5.71272	1
GSE11087_relA_ile_starvation	GEO	affymetrix	Aerobic	0.403046	4.65962	2.89812	1
E-MEXP-584_pat3	ArrayExpress	affymetrix	Aerobic	0.43475	7.23829	1.79155e-10	1
GSE4394_wt_rif_6min	GEO	cDNA	Aerobic	0.84133	1.82184	-6.06463e-10	2
GSE7_50ug/mltrp_30min	GEO	cDNA	Aerobic	0.530206	5.47338e-10	-1.61597e-09	2
E-MEXP-1166_MGStat_prolonged_stat_phase_37d	ArrayExpress	cDNA	Aerobic	0.55044	2.15631	1.48225e-11	3
GSE8965_FA_tp1	GEO	cDNA	Aerobic	0	0	0	2
GSE8965_SA_tp4	GEO	cDNA	Aerobic	0.225713	1.46189	1.633e-09	1
GSE4394_pnp	GEO	cDNA	Aerobic	0.260299	2.77982	-9.05132e-11	3
GSE4778_t5_ph5.5	GEO	affymetrix	Aerobic	0.598561	1.88037	0.00160175	2
GSE4569_1h_UV	GEO	cDNA	Aerobic	0.17407	17.123	3.18416e-10	1
GSE7439_luxS_epinephrine	GEO	affymetrix	Aerobic	0.936755	1.81381e-10	0.936051	3
GSE7573_iscR_MOPS_DeaNO_5min	GEO	cDNA	Aerobic	0.490279	3.59417	6.90528e-10	3
GSE5552_indole	GEO	affymetrix	Aerobic	0.835076	3.32239	5.42105	3
GSE6992_soxR_paraquat_t2	GEO	affymetrix	Aerobic	0.265691	2.89517	1.75151e-10	3
GSE7265_WT_tp16	GEO	cDNA	Aerobic	0.312958	4.57895	3.65225	1
GSE7265_WT_tp5	GEO	cDNA	Aerobic	0.377055	14.8691	3.77132	1
E-MEXP-953_T48_MG1655_Biofilm_biofilm_F_lambda_ilvG_rfb_50_rph_1	ArrayExpress	affymetrix	Aerobic	0.37302	4.22013	6.63883e-09	2
GSE6425_MG1655_aerobic_2.5	GEO	affymetrix	Aerobic	0.60112	6.05172	1.06344e-10	3
E-MEXP-1166_DHAdp_glu1000g	ArrayExpress	cDNA	Aerobic	0.69542	8.92686	8.52249	1
GSE7573_wt_MOPS_methionine_DeaNO_5min	GEO	cDNA	Aerobic	0.870918	5.07951	0.368177	3
GSE6992_wt_paraquat_t8	GEO	affymetrix	Aerobic	0.523388	1.81555	4.42683e-10	1
GSE4394_RNaseE_N	GEO	cDNA	Aerobic	0.237228	5.86937	3.09607	1
E-MEXP-926_MOPS_glucose_83972	ArrayExpress	affymetrix	Aerobic	0.140979	16.1299	11.416	2
E-MEXP-926_urine_VR50	ArrayExpress	affymetrix	Aerobic	0.94387	8.50178e-11	1.89037e-10	1
E-MEXP-720_crl	ArrayExpress	cDNA	Aerobic	0.422248	4.33573	0.00112994	1
GSE6425_UTI89_aerobic_5	GEO	affymetrix	Aerobic	0.168709	2.54759	4.22591e-09	1
GSE4556_ph5.7	GEO	affymetrix	Aerobic	0.688385	0.430295	-4.31467e-11	3
GSE6425_MG1655_anaerobic_6.75	GEO	affymetrix	Anaerobic	0.126462	1.86285	5.5151e-10	2
GSE6712_benzalkonium_chloride+50ppm	GEO	p33	Aerobic	0.295584	11.072	-1.10987e-09	2
GSE4394_RNaseE_N_rif_4.5min	GEO	cDNA	Aerobic	0.938382	5.99408e-11	5.59317e-10	3
E-MEXP-953_T20_MG1655_Stationary_planktonic_F_lambda_ilvG_rfb_50_rph_1	ArrayExpress	affymetrix	Aerobic	0.306877	6.22589	3.74039	1
GSE9_lexA_UV_5	GEO	cDNA	Aerobic	0.708851	8.63354e-10	1.26e-09	2
GSE4383_ara_KSL2000	GEO	cDNA	Aerobic	0.248886	3.46029	1.40772e-08	2
GSE9582_luxS	GEO	affymetrix	Aerobic	1.01047	7.08008e-12	3.80094e-11	3
GSE6712_control	GEO	p33	Aerobic	0.58755	4.55522	-2.19953e-09	1
GSE8965_SA_tp3	GEO	cDNA	Aerobic	0.199155	6.09295	6.53023	3
E-MEXP-926_MOPS_glucose_83972	ArrayExpress	affymetrix	Aerobic	0.265194	14.4565	-5.69536e-10	1
GSE7398_wt_90	GEO	affymetrix	Aerobic	0.142225	2.64018	-1.7013e-09	2
GSE7265_WT_tp2	GEO	cDNA	Aerobic	1.01068	-3.52389e-11	8.56724e-11	1
GSE7398_fis_90	GEO	affymetrix	Aerobic	0.21057	0.911942	-1.28309e-08	1
GSE8540_met_suppl_GSNO500_5min	GEO	cDNA	Aerobic	0.960069	8.22705e-13	-4.78422e-11	2
GSE9_lexA_UV_10	GEO	cDNA	Aerobic	1.01033	-4.35831e-11	-2.36325e-09	2
GSE6712_benzalkonium_chloride+50ppm	GEO	p33	Aerobic	0.439327	0.66512	-1.52448e-09	1
GSE4394_eno	GEO	cDNA	Aerobic	0.353503	2.64208	2.86475e-10	3
GSE9582_luxS	GEO	affymetrix	Aerobic	1.0105	-1.5444e-11	7.46126e-13	3
GSE1154_DH5alpha	GEO	affymetrix	Aerobic	0.055981	1.10213	0.736509	2
GSE4394_eno_rif_1.5min	GEO	cDNA	Aerobic	0.272806	8.43381	3.61798	2
GSE6923_BW25113_wt_R1drd19_24_LB	GEO	affymetrix	Aerobic	0.96912	-8.85987e-11	-2.58815e-10	1
GSE4778_t0_ph7.6	GEO	affymetrix	Aerobic	0.922518	3.00969	-2.68656e-10	1
GSE3665_wt_20g/l_etOH	GEO	affymetrix	Aerobic	0.296452	5.16529	0.264406	2
E-MEXP-1166_DHStat_prolonged_stat_phase_37d	ArrayExpress	cDNA	Aerobic	0.472597	14.7342	3.97131	2
GSE3123_pRNG3	GEO	cDNA	Aerobic	0.848052	5.02174	0.00226939	1
GSE7243_phoU	GEO	affymetrix	Aerobic	0	0	0	2
GSE6609_D1_aerobic_lon	GEO	cDNA	Aerobic	0.902325	5.10483e-11	1.66908e-11	3
E-MEXP-584_urine	ArrayExpress	affymetrix	Aerobic	0.333617	5.29145	8.64744e-10	1
GSE4569_50h_UV	GEO	cDNA	Aerobic	0.137758	16.9979	3.29451	2
GSE6609_D1_anaerobic_lon	GEO	cDNA	Anaerobic	0.265586	4.46235	0.634285	1
E-MEXP-584_MOPS	ArrayExpress	affymetrix	Aerobic	1.0102	-1.93694e-11	-3.43863e-10	2
GSE6992_wt_paraquat_t6	GEO	affymetrix	Aerobic	1.01026	4.02401e-11	-1.1024e-10	2
GSM570_50ug/mltrp_60min	GEO	cDNA	Aerobic	0.0437017	20.0049	1.75517	2
GSE7265_WT_tp12	GEO	cDNA	Aerobic	1.01056	-4.26248e-11	3.82119e-11	1
GSE6444_hfq	GEO	cDNA	Aerobic	0.97554	3.24722e-11	6.69492e-12	1
GSE4562_trpE_glucose	GEO	affymetrix	Aerobic	0.478981	7.83129e-11	7.45816e-12	1
E-TABM-103_t4.6	ArrayExpress	affymetrix	Aerobic	0	0	0	2
GSE6425_MG1655_aerobic_18	GEO	affymetrix	Aerobic	0.102387	1.4991	0.23845	2
GSE8540_wt_GSNO100_5min	GEO	cDNA	Aerobic	0.44814	-2.63625e-11	0.0705371	3
GSE4394_RNaseE_N_rif_3min	GEO	cDNA	Aerobic	0.944639	-7.8434e-11	1.24791e-10	3
GSE8965_SA_tp2	GEO	cDNA	Aerobic	0.46259	16.5588	4.98967	1
GSE7_50ug/mltrp_60min	GEO	cDNA	Aerobic	0.0439191	20.3355	1.76266	2
E-MEXP-732_p23_g9	ArrayExpress	affymetrix	Aerobic	0.909326	1.56817e-10	4.17289e-12	3
GSE6195_biofilm_istatin	GEO	affymetrix	Aerobic	0	0	0	2
E-MEXP-732_p5_g21	ArrayExpress	affymetrix	Aerobic	0.532731	2.256	6.93173	1
GSE3665_mut2_0g/l_etOH	GEO	affymetrix	Aerobic	0.247379	3.42136	6.65911e-09	3
GSE6712_benzalkonium_chloride+50ppm	GEO	p33	Aerobic	0.0325617	0.227101	-2.56037e-08	2
GSE4394_wt_rif_3min	GEO	cDNA	Aerobic	0.945602	1.31833e-10	-1.1662e-09	3
GSE4394_rhlB	GEO	cDNA	Aerobic	0.928551	-2.55105e-11	2.30193e-11	3
GSE7265_WT_tp8	GEO	cDNA	Aerobic	0.720791	7.842	5.02708e-10	1
GSE8965_SA_tp1	GEO	cDNA	Aerobic	0.742955	3.62731e-12	-1.01798e-11	2
E-MEXP-732_p23_g9	ArrayExpress	affymetrix	Aerobic	0.959519	-3.06721e-10	-1.39841e-10	3
E-MEXP-1166_DHAdp_glu1000g	ArrayExpress	cDNA	Aerobic	0.952966	3.08685e-10	-6.43351e-10	1
E-MEXP-584_pat3	ArrayExpress	affymetrix	Aerobic	0.381923	6.72988	5.73224e-10	2
GSE6425_MG1655_anaerobic_3	GEO	affymetrix	Anaerobic	0.212765	2.52216	1.20072e-08	2
GSE4394_wt_rif_1.5min	GEO	cDNA	Aerobic	0.948933	3.92529e-11	-1.09386e-09	2
GSE4394_RNaseE_N_rif_1.5min	GEO	cDNA	Aerobic	0.973576	-9.82924e-12	1.7977e-10	2
GSE5098_anaeroob_NOC5/7	GEO	cDNA	Anaerobic	0.681739	3.56059	2.13881e-10	1
GSE6609_D3_anaerobic_lon	GEO	cDNA	Anaerobic	0.967761	5.51767e-11	-4.01562e-13	2
GSE6781_pGIT1_NO2	GEO	cDNA	Aerobic	0.389636	2.75155	1.47085	3
GSE6296_HEPES	GEO	cDNA	Aerobic	0.666403	10.0634	6.57988	3
GSE1154_DH5alpha_F_plasmid	GEO	affymetrix	Aerobic	0.0726448	0.964024	3.33062e-10	2
GSE9587_luxS	GEO	affymetrix	Aerobic	1.00971	-2.22315e-11	-3.92874e-11	3
GSE9_UV_20	GEO	cDNA	Aerobic	0.892873	3.21538	3.63553	3
E-MEXP-1001_biofilm	ArrayExpress	affymetrix	Aerobic	0.333056	8.22935	-1.99547e-09	2
GSE4394_pnp	GEO	cDNA	Aerobic	0.240164	1.68254	-2.2761e-09	3
GSE8540_cysB_GSNO500_5min	GEO	cDNA	Aerobic	0.550684	7.69598	27.8737	3
GSE7573_norR_MOPS_DeaNO_5min	GEO	cDNA	Aerobic	0.583702	14.2344	-4.99544e-11	1
GSE6781_pGIT8_NO2	GEO	cDNA	Aerobic	0.268313	2.04993	-3.45898e-11	2
GSE9203_wt	GEO	affymetrix	Aerobic	0.601729	2.8706	1.43765e-10	3
E-MEXP-1166_DHStat_prolonged_stat_phase_37d	ArrayExpress	cDNA	Aerobic	0.143984	3.73746	30.729	2
GSE5098_norR_anaeroob_NOC5/7	GEO	cDNA	Anaerobic	0.150219	9.5678	-3.8889e-10	1
GSE5981_rsd_overexpr_OD0.9	GEO	cDNA	Aerobic	0.652265	4.9484	0.00174546	1
GSE7439_luxS_AI3	GEO	affymetrix	Aerobic	0.457325	3.13518	7.92118e-11	3
GSE4778_t5_ph5.5	GEO	affymetrix	Aerobic	0.93981	3.73129e-13	-1.12511e-10	3
GSE7573_arcA_MOPS_DeaNO_5min	GEO	cDNA	Aerobic	0.954869	2.60496e-10	-1.24669e-09	2
GSE10974_hsp60pv98Iinducible	GEO	affymetrix	Aerobic	0.621405	-3.676e-08	-9.47398e-11	3
GSE4394_rhlB_rif_3min	GEO	cDNA	Aerobic	0.785901	5.84539	2.73929e-11	1
GSE8965_SA_tp1	GEO	cDNA	Aerobic	0.680823	7.24119	1.78075e-09	1
GSE8965_SA_tp4	GEO	cDNA	Aerobic	0.550782	2.61631	0.00147389	1
GSE6992_soxR_paraquat_t6	GEO	affymetrix	Aerobic	0.20506	11.9508	3.91713	2
GSE9388_3.5h_AI_2	GEO	affymetrix	Aerobic	0.503246	16.2474	-1.27766e-09	2
GSE4394_rhlB_rif_6min	GEO	cDNA	Aerobic	0.941155	-5.43097e-11	6.25283e-11	1
E-MEXP-720_crl	ArrayExpress	cDNA	Aerobic	0.417878	3.66911	0.00111824	1
GSE7_5min	GEO	cDNA	Aerobic	0.356484	3.70878e-09	1.34057e-09	2
GSE7573_wt_MOPS_DeaNO_5min	GEO	cDNA	Aerobic	1.01056	8.03391e-11	-1.58317e-11	3
E-MEXP-953_T10_MG1655_Exponiential_planktonic_F_lambda_ilvG_rfb_50_rph_1	ArrayExpress	affymetrix	Aerobic	0	0	0	2
E-TABM-103_t9	ArrayExpress	affymetrix	Aerobic	0.310341	0.314785	2.69739e-10	1
GSE6425_MG1655_aerobic_5	GEO	affymetrix	Aerobic	0.147948	2.18084	7.01416e-10	2
GSE4778_t10_ph5.5	GEO	affymetrix	Aerobic	0.947107	-1.38603e-10	-3.10225e-11	1
GSE7265_WT_tp15	GEO	cDNA	Aerobic	0.316259	3.20629	3.51641	2
GSE8965_SA_tp4	GEO	cDNA	Aerobic	0.288553	1.65483	0.927839	3
GSE6425_UTI89_aerobic_19.5	GEO	affymetrix	Aerobic	0.0926053	1.33645	1.60684e-09	2
GSE3665_mut3_20g/l_etOH	GEO	affymetrix	Aerobic	0.403022	6.50782	4.40751e-10	2
GSE4556_ph5.7	GEO	affymetrix	Aerobic	0.79637	-8.1399e-11	4.66367e-12	1
GSE7265_WT_tp5	GEO	cDNA	Aerobic	0.33894	13.2605	-5.6773e-12	1
GSE7573_MOPS_SeOh_5min	GEO	cDNA	Aerobic	0.752491	7.91335	0.00201366	1
GSE6425_UTI89_aerobic_8	GEO	affymetrix	Aerobic	0.152071	2.12651	-7.53286e-12	2
E-TABM-103_t6.7	ArrayExpress	affymetrix	Aerobic	0.392274	3.70417	0.740874	1
GSE6425_UTI89_anaerobic_2.5	GEO	affymetrix	Anaerobic	0.469699	6.84146	0.489071	1
GSE4394_wt_rif_1.5min	GEO	cDNA	Aerobic	0.955859	1.01962e-11	-1.18147e-10	2
GSE4394_wt_rif_1.5min	GEO	cDNA	Aerobic	1.01058	1.45807e-10	-2.70706e-10	3
GSE6712_benzalkonium_chloride	GEO	p33	Aerobic	0.17494	3.19258	11.0059	2
GSE4394_rhlB_rif_4.5min	GEO	cDNA	Aerobic	0.908239	-9.24965e-10	-6.26172e-10	2
GSE7398_fis_240	GEO	affymetrix	Aerobic	0.108104	2.09747	-4.01758e-11	2
GSE8965_SA_tp3	GEO	cDNA	Aerobic	0.281873	1.16945	-2.22636e-10	1
E-MEXP-584_urine	ArrayExpress	affymetrix	Aerobic	0.367919	3.59569	0.00098455	1
GSE6425_UTI89_anaerobic_4	GEO	affymetrix	Anaerobic	0.161895	1.20329	3.31377e-10	2
GSE6426_MG1655	GEO	affymetrix	Aerobic	0.444575	17.9	6.14994e-09	2
GSE2140_tet_inducible_sig32_t10	GEO	affymetrix	Aerobic	0.106199	0.415095	3.36722	2
GSE7265_WT_tp1	GEO	cDNA	Aerobic	0.99691	4.0498e-11	2.71724e-10	1
E-MEXP-1166_MG1655	ArrayExpress	cDNA	Aerobic	0.590846	10.4124	10.5803	3
E-TABM-103_t4.6	ArrayExpress	affymetrix	Aerobic	0	0	0	2
GSE7_trpR2_15ug/ml_inda	GEO	cDNA	Aerobic	0.294567	5.21585	5.78772	3
GSE9814_wt	GEO	affymetrix	Aerobic	0.796472	7.46225	1.91691e-11	2
GSE3283_wt_leucine	GEO	cDNA	Aerobic	0.48465	15.2487	3.67566	3
GSE8965_FA_tp3	GEO	cDNA	Aerobic	0.875449	3.55823	1.08305e-10	3
GSE6923_BW25113_wt_R1drd19_7_LB	GEO	affymetrix	Aerobic	0.100808	4.56799e-11	-1.59079e-10	2
E-MEXP-1166_MGAdp_glu1000g	ArrayExpress	cDNA	Aerobic	0.330168	2.56722	5.33878	1
GSE4394_rhlB	GEO	cDNA	Aerobic	0.636509	6.19195	0.0017033	3
GSE4394_rhlB_rif_1.5min	GEO	cDNA	Aerobic	0.957613	5.7639e-11	5.78402e-11	3
GSE4778_t0_ph7.6	GEO	affymetrix	Aerobic	0.988291	1.92742e-11	1.9447e-10	3
GSE8965_FA_tp3	GEO	cDNA	Aerobic	0.4636	3.18173	7.50161	1
GSE7265_WT_tp3	GEO	cDNA	Aerobic	0.987957	8.58767e-11	1.37406e-12	1
GSE4556_ph7.0	GEO	affymetrix	Aerobic	0.57467	3.34088	-6.18652e-09	3
GSE6609_D1_aerobic	GEO	cDNA	Aerobic	0.386353	3.38473	1.38301	1
E-MEXP-1166_MGAdp_glu1000g	ArrayExpress	cDNA	Aerobic	0.622751	5.22225	-2.97784e-11	1
GSE7573_wt_MOPS_DeaNO_5min	GEO	cDNA	Aerobic	0.552985	3.83361	8.67129e-09	1
GSE7439_luxS_dpd	GEO	affymetrix	Aerobic	0	0	0	2
GSE4394_RNaseE_N	GEO	cDNA	Aerobic	0.148399	3.26196	2.43797	2
GSE6992_wt_paraquat_t10	GEO	affymetrix	Aerobic	0.51132	6.8687	1.95023	3
GSE7398_fis_150	GEO	affymetrix	Aerobic	0.239226	3.70117	5.47155e-11	2
GSE9_UV_40	GEO	cDNA	Aerobic	0.361528	3.23443	0.317977	1
E-MEXP-1166_MGAdp_glu1000g	ArrayExpress	cDNA	Aerobic	0.961361	4.4662e-11	-1.41712e-10	3
GSE4562_tnaA	GEO	affymetrix	Aerobic	0.638987	-2.2928e-11	-1.55841e-11	1
GSE9_lexA_UV_20	GEO	cDNA	Aerobic	0.99978	1.24975e-10	-3.50562e-10	3
GSE6425_MG1655_aerobic_26	GEO	affymetrix	Aerobic	0.104704	2.24983	1.31202	2
GSE6444_hfq_rpoEinduced_IPTG	GEO	cDNA	Aerobic	0.613323	6.50728	0.00164125	1
GSE4394_eno_rif_3min	GEO	cDNA	Aerobic	0.228738	2.80979	0.000612107	1
GSE4394_rhlB_rif_1.5min	GEO	cDNA	Aerobic	0.940436	1.76414e-10	-1.71939e-10	3
GSE7265_WT_tp11	GEO	cDNA	Aerobic	0.631207	11.6333	-2.38893e-10	3
GSE7398_wt_360	GEO	affymetrix	Aerobic	0.160827	1.48309	-2.01873e-09	1
GSE6444_hfq	GEO	cDNA	Aerobic	0.984186	-1.55534e-10	-4.69887e-10	1
GSE3665_mut3_40g/l_etOH	GEO	affymetrix	Aerobic	0.401685	3.35731	8.98433e-11	3
GSE7573_wt_MOPS_DeaNO_5min	GEO	cDNA	Aerobic	0.923991	6.08898e-12	8.20538e-11	1
GSE4556_ph7.0	GEO	affymetrix	Aerobic	0.715552	10.3936	4.02184e-11	3
GSE3123_rne_pRNG3	GEO	cDNA	Aerobic	0.25674	1.52154	3.42213e-11	2
GSE8540_wt_GSNO500_5min	GEO	cDNA	Aerobic	0.730707	3.24446e-11	7.22355	2
GSE6426_UTI89	GEO	affymetrix	Aerobic	0	0	0	2
GSE9755_1perc_tannine	GEO	affymetrix	Aerobic	0.239347	0.363209	1.40361e-10	1
GSE7_trpR2_10ug/ml	GEO	cDNA	Aerobic	0.235826	2.88483	2.28902e-08	1
E-MEXP-926_MOPS_glucose_VR50	ArrayExpress	affymetrix	Aerobic	1.01056	-4.69954e-12	7.1176e-12	3
GSE6609_D3_aerobic_lon	GEO	cDNA	Aerobic	0.455697	8.75329	2.1781e-09	1
E-TABM-103_t16	ArrayExpress	affymetrix	Aerobic	0.384893	2.71279	3.06594e-10	2
E-MEXP-1177_mucus	ArrayExpress	affymetrix	Aerobic	0.319494	3.81591	0.644078	2
GSE6425_MG1655_anaerobic_3.75	GEO	affymetrix	Anaerobic	0.109939	1.63281	9.3417e-10	2
GSE7265_WT_tp8	GEO	cDNA	Aerobic	1.01056	-3.49165e-10	1.23926e-11	1
GSE8965_SA_tp1	GEO	cDNA	Aerobic	0.208433	0.525916	4.34258e-10	2
GSE3123_pRNG3	GEO	cDNA	Aerobic	0.805409	6.05454	5.36794e-09	3
GSE4344_M9_abundance	GEO	cDNA	Aerobic	0.215055	3.6696	1.98181	2
GSE6609_D3_anaerobic_lon	GEO	cDNA	Anaerobic	0.606788	7.94108	10.1708	1
GSE8965_FA_tp2	GEO	cDNA	Aerobic	0.20215	5.21719	3.86663	2
E-MEXP-1166_MGStat_prolonged_stat_phase_37d	ArrayExpress	cDNA	Aerobic	0.582321	11.3171	1.5803	1
E-MEXP-1166_MGStat_prolonged_stat_phase_37d	ArrayExpress	cDNA	Aerobic	0.415683	1.93818	0.00111236	3
GSE7_10ug/ml_indaa_5min	GEO	cDNA	Aerobic	0.143233	8.06132	5.71719e-10	2
GSE9587_wt	GEO	affymetrix	Aerobic	0.977837	1.66904e-11	-1.17317e-10	3
GSE4394_rhlB	GEO	cDNA	Aerobic	0.484386	5.85508	1.2744	3
GSE7265_WT_tp10	GEO	cDNA	Aerobic	0.31479	20.28	8.51157e-11	1
E-MEXP-953_T20_MG1655_Stationary_planktonic_F_lambda_ilvG_rfb_50_rph_1	ArrayExpress	affymetrix	Aerobic	0.328339	4.78488	1.21842e-11	1
GSE4394_eno_rif_6min	GEO	cDNA	Aerobic	0.40137	5.09109	0.00107407	1
GSE9203_isrR	GEO	affymetrix	Aerobic	0.124338	3.17203	9.08012	1
E-MEXP-910_MG_kan_N15+	ArrayExpress	affymetrix	Aerobic	0.748066	8.84575	0.0769297	3
GSE7573_metJ_MOPS_DeaNO_5min	GEO	cDNA	Aerobic	0.0729703	24.6862	4.55388	2
GSE7398_wt_150	GEO	affymetrix	Aerobic	0.207698	2.973	-1.45415e-09	3
GSE3283_Irp_leucine	GEO	cDNA	Aerobic	0.572264	13.5693	-1.73294e-11	3
E-MEXP-1166_DHAdp_glu1000g	ArrayExpress	cDNA	Aerobic	0.309726	1.57326	9.58283	1
GSE9_lexA_UV_60	GEO	cDNA	Aerobic	0.733464	1.3501e-11	-1.70845e-11	2
GSE6781_pGIT8_NO2	GEO	cDNA	Aerobic	0.48295	7.7024	9.85705	3
GSE4778_t5_ph5.5	GEO	affymetrix	Aerobic	0.939633	-7.45897e-10	1.14741e-09	3
GSE6781_pGIT1	GEO	cDNA	Aerobic	0.529706	3.18205	0.00141749	3
GSE5098_norR_anaeroob_NOC5/7	GEO	cDNA	Anaerobic	0.0475735	12.7311	5.90877	2
GSE5981_rsd_overexpr_OD0.4	GEO	cDNA	Aerobic	0.571506	13.6556	2.98055e-11	3
GSE9203_isrK	GEO	affymetrix	Aerobic	0.309629	16.1486	7.82154e-11	3
GSE8540_dpp_GSNO100_5min	GEO	cDNA	Aerobic	0.997197	7.4763e-12	-3.02103e-11	2
GSE6992_soxR_paraquat_t10	GEO	affymetrix	Aerobic	0.20571	23.5589	6.70075e-10	2
GSE7573_arcA_MOPS_DeaNO_5min	GEO	cDNA	Aerobic	0.210301	4.14648	0.848994	1
GSE7398_wt_360	GEO	affymetrix	Aerobic	0.121304	1.45892	-3.21844e-10	2
GSE4383_ptrc99A_rraA_KSL2000	GEO	cDNA	Aerobic	0.135886	6.39016	1.23006e-09	2
GSE9388_4h_AI_2	GEO	affymetrix	Aerobic	0.372196	15.7835	8.74899	1
GSE8540_flhDC_GSNO500_5min	GEO	cDNA	Aerobic	0.928619	1.27917e-12	1.01495e-10	2
GSE3665_mut1_0g/l_etOH	GEO	affymetrix	Aerobic	0.340119	5.19305	-1.83831e-09	3
GSE7243_wt	GEO	affymetrix	Aerobic	0.306943	18.4203	9.11223	1
GSE6444_rseA	GEO	cDNA	Aerobic	0.759872	7.04519	3.11926	3
GSE2140_tet_inducible_sig32_t10	GEO	affymetrix	Aerobic	0.105089	0.479706	2.62142	3
E-MEXP-732_p5	ArrayExpress	affymetrix	Aerobic	0.973667	-1.13982e-10	-3.73488e-10	3
GSE6425_MG1655_aerobic_8	GEO	affymetrix	Aerobic	0.115006	1.55854	2.00749e-11	2
GSE4394_wt_rif_6min	GEO	cDNA	Aerobic	0.666834	0.0775721	2.42997e-10	3
GSE5098_aeroob_NOC5/7	GEO	cDNA	Aerobic	0.188142	2.62258	3.49141e-08	1
GSE6609_D1_anaerobic	GEO	cDNA	Anaerobic	0.702825	0.842151	-2.76458e-10	2
E-MEXP-584_urine	ArrayExpress	affymetrix	Aerobic	0.324746	4.2828	0.000869021	1
GSE6425_UTI89_aerobic_26	GEO	affymetrix	Aerobic	0.106573	2.12952	1.03382	2
GSE7_60min	GEO	cDNA	Aerobic	0.761027	1.75174	4.08115	3
GSE4383_rraA_OD:1	GEO	cDNA	Aerobic	0.331295	4.02072	-3.28172e-08	3
GSE4556_ph5.7	GEO	affymetrix	Aerobic	0.819949	2.22961e-11	6.64083e-13	3
GSE6609_D3_anaerobic	GEO	cDNA	Anaerobic	0.36449	-7.73012e-11	5.77343e-11	3
GSE8965_FA_tp1	GEO	cDNA	Aerobic	0.539246	11.5791	2.74901e-10	3
GSE3665_wt_20g/l_etOH	GEO	affymetrix	Aerobic	0.313976	4.82452	-6.01139e-10	1
GSE9_UV_60	GEO	cDNA	Aerobic	0.927739	-4.77633e-11	3.13777e-11	1
GSE8540_flhDC_GSNO500_5min	GEO	cDNA	Aerobic	0.968498	1.51146e-11	-8.34602e-11	3
GSE7265_WT_tp14	GEO	cDNA	Aerobic	0.342463	9.47842	1.53492	3
GSE8965_FA_tp3	GEO	cDNA	Aerobic	0.286668	3.65649	6.12312e-09	1
GSE7265_WT_tp4	GEO	cDNA	Aerobic	0.751552	8.79377	2.203	3
GSE6425_UTI89_anaerobic_3	GEO	affymetrix	Anaerobic	0.292637	6.63424	1.73178	3
GSE6425_MG1655_aerobic_12	GEO	affymetrix	Aerobic	0.111415	1.48156	-2.26444e-10	2
GSE8540_metJ_GSNO500_5min	GEO	cDNA	Aerobic	0.947587	7.84781e-12	-2.64683e-11	1
GSE8965_FA_tp4	GEO	cDNA	Aerobic	0.845354	5.18381	9.55794e-11	3
GSE6712_benzalkonium_chloride	GEO	p33	Aerobic	0.18088	7.91638	1.78374	2
GSE11087_relA_spoT_ile_starvation	GEO	affymetrix	Aerobic	0.285239	-3.06284e-11	4.23264e-11	2
GSE7265_WT_tp7	GEO	cDNA	Aerobic	0.602317	3.5475	3.40263	3
E-TABM-103_t6.7	ArrayExpress	affymetrix	Aerobic	0.508856	-2.19696e-10	2.23324e-10	1
GSE7265_WT_tp17	GEO	cDNA	Aerobic	0.18581	3.22403	2.71143	1
GSE6425_UTI89_anaerobic_6	GEO	affymetrix	Anaerobic	0.111058	1.7053	0.32611	2
GSE7_trpR2_50ug/ml	GEO	cDNA	Aerobic	0.39599	3.20584	5.12122e-10	3
GSE6425_MG1655_anaerobic_4.5	GEO	affymetrix	Anaerobic	0.113342	1.7014	-2.61481e-09	2
GSE9814_rpoS	GEO	affymetrix	Aerobic	0.800612	-3.39607e-10	2.59714e-10	2
E-MEXP-1166_MGStat_prolonged_stat_phase_37d	ArrayExpress	cDNA	Aerobic	0.505717	10.9988	1.9039e-10	1
GSE4394_wt_rif_3min	GEO	cDNA	Aerobic	0.558096	8.77113	4.25843e-10	2
GSE6923_BW25113_wt_15_LB	GEO	affymetrix	Aerobic	0.872289	4.09854	-6.87056e-11	1
GSE2140_tet_inducible_sig32_t5	GEO	affymetrix	Aerobic	0.200736	0.855459	5.27018	2
E-MEXP-1001_suspension_exp	ArrayExpress	affymetrix	Aerobic	0.17616	2.2117	1.71559e-09	1
GSE5552_epinephrine	GEO	affymetrix	Aerobic	0.917101	-6.89194e-08	3.48885e-10	2
GSE4778_t1_ph5.5	GEO	affymetrix	Aerobic	0.98561	-1.23063e-10	1.30448e-10	3
GSE7573_argR_MOPS_DeaNO_5min	GEO	cDNA	Aerobic	0.526896	14.5882	7.90561e-11	1
GSE8540_wt_DPTA_5min	GEO	cDNA	Aerobic	0.830008	6.7175	6.71483e-11	3
GSE4394_rhlB_rif_6min	GEO	cDNA	Aerobic	0.907623	-3.54664e-10	2.96468e-10	2
GSE6923_ATCC25404_wt_R1drd19_24_LB	GEO	affymetrix	Aerobic	0.943246	-1.29753e-11	6.2098e-11	1
GSE8965_FA_tp3	GEO	cDNA	Aerobic	0.409168	0.496235	1.35583e-11	3
GSE4394_rhlB_rif_3min	GEO	cDNA	Aerobic	0.948367	-1.2566e-10	3.70849e-10	1
GSE7_10ug/ml_indaa_60min	GEO	cDNA	Aerobic	0.0603269	6.55012	1.96978	2
GSE7398_fis_360	GEO	affymetrix	Aerobic	0.160396	2.49197	6.6964e-10	2
GSE6992_wt_paraquat_t2	GEO	affymetrix	Aerobic	0.452047	-1.79572e-09	6.30127e-10	1
GSE7265_WT_tp3	GEO	cDNA	Aerobic	0.997396	-9.24657e-12	1.05062e-10	1
E-MEXP-926_urine_biofilm_83972	ArrayExpress	affymetrix	Aerobic	0.200002	3.23536	1.97628	2
GSE8540_wt_GSNO100_5min	GEO	cDNA	Aerobic	0.392493	0.874998	2.19491e-11	3
GSE8540_metJ_GSNO500_5min	GEO	cDNA	Aerobic	0.832779	5.1169	0.00222852	3
GSE6712_benzalkonium_chloride	GEO	p33	Aerobic	0.440605	3.86133	3.44613	3
E-MEXP-953_T48_K12_Biofilm_biofilm_F+Lampda+	ArrayExpress	affymetrix	Aerobic	0	0	0	2
GSE1154_DH5alpha	GEO	affymetrix	Aerobic	0.0647401	0.93383	0.18233	2
GSE6425_UTI89_aerobic_2.5	GEO	affymetrix	Aerobic	0.517901	10.1118	2.10884	1
GSE4344_M9_abundance	GEO	cDNA	Aerobic	0.33809	3.07558	0.000904728	1
GSE6712_control	GEO	p33	Aerobic	0.374266	12.1986	-6.70952e-11	2
GSE11087_wt_ile_starvation	GEO	affymetrix	Aerobic	0.563186	2.86219e-09	-4.02336e-10	1
GSE4394_wt_rif_3min	GEO	cDNA	Aerobic	0.82194	-1.24363e-10	-1.4433e-11	2
GSE4556_ph8.5	GEO	affymetrix	Aerobic	0	0	0	2
GSE5098_aeroob_NOC5/7	GEO	cDNA	Aerobic	0.143032	1.7815	1.61436e-09	1
GSE7398_wt_150	GEO	affymetrix	Aerobic	0.193236	2.91252	-1.18353e-09	1
E-MEXP-926_urine_biofilm_83972	ArrayExpress	affymetrix	Aerobic	0.213376	3.53826	-4.75852e-11	2
GSE6444_rpoEinduced_IPTG	GEO	cDNA	Aerobic	0.991731	-1.30476e-11	-3.29917e-11	1
GSE4394_RNaseE_N_rif_4.5min	GEO	cDNA	Aerobic	0.947925	-2.95928e-10	6.94012e-10	1
GSE7265_WT_tp11	GEO	cDNA	Aerobic	0.957399	7.3058e-12	-5.92455e-11	3
GSE6444_hfq	GEO	cDNA	Aerobic	1.00354	-1.99256e-11	5.49923e-12	1
GSE6426_UTI89	GEO	affymetrix	Aerobic	0	0	0	2
GSE7573_nsrR_hmpA_MOPS_DeaNO_5min	GEO	cDNA	Aerobic	0.277108	2.61003	-1.73758e-11	3
E-MEXP-953_T48_MG1655_Biofilm_biofilm_F_lambda_ilvG_rfb_50_rph_1	ArrayExpress	affymetrix	Aerobic	0.31656	7.96894	7.4524e-10	3
GSE7_50ug/mltrp_5min	GEO	cDNA	Aerobic	0.349779	1.02783e-09	5.94458e-10	3
GSE6444_rpoEinduced_IPTG	GEO	cDNA	Aerobic	0.822345	3.85181	2.87393e-11	1
GSE8540_wt_GSNO500_5min	GEO	cDNA	Aerobic	0.470979	1.34195	0.00126034	3
GSE6609_D3_aerobic_lon	GEO	cDNA	Aerobic	0.253478	7.7735	-4.23532e-10	1
GSE4394_pnp_rif_1.5min	GEO	cDNA	Aerobic	0.964011	-2.31609e-11	3.46857e-11	3
GSE7265_WT_tp13	GEO	cDNA	Aerobic	1.01068	-8.86229e-13	5.6454e-11	1
GSE6609_D3_anaerobic	GEO	cDNA	Anaerobic	0.259286	4.40418	1.4566e-08	2
GSE8540_met_suppl_GSNO500_5min	GEO	cDNA	Aerobic	0.62929	8.37558	1.85683e-12	2
GSE6609_D3_aerobic_lon	GEO	cDNA	Aerobic	0.288724	7.3299	4.03114	3
E-MEXP-584_pat2	ArrayExpress	affymetrix	Aerobic	0.642924	6.21215	1.87414e-10	1
GSE8540_wt_GSNO100_5min	GEO	cDNA	Aerobic	0.996415	1.62534e-10	9.13959e-12	1
GSE8965_FA_tp2	GEO	cDNA	Aerobic	0.95084	-6.75137e-12	-3.1885e-11	1
E-TABM-103_t9	ArrayExpress	affymetrix	Aerobic	0.51458	2.57109	2.74933e-10	2
GSE7265_WT_tp17	GEO	cDNA	Aerobic	0.209673	21.6795	-3.33746e-10	2
GSE4562_yceB_glucose	GEO	affymetrix	Aerobic	0.716731	1.76382e-11	3.42576e-11	1
E-TABM-103_t7.8	ArrayExpress	affymetrix	Aerobic	0.534863	4.43153e-11	2.1877e-10	2
E-MEXP-584_pat1	ArrayExpress	affymetrix	Aerobic	0.698625	4.36183	1.39428e-09	2
GSE7265_WT_tp9	GEO	cDNA	Aerobic	0.469928	14.7574	2.99992e-11	1
GSE9_lexA_20	GEO	cDNA	Aerobic	0.977778	0.947084	7.4667e-11	3
GSE7398_fis_360	GEO	affymetrix	Aerobic	0.113557	2.2966	-8.72633e-10	2
GSE4394_eno	GEO	cDNA	Aerobic	0.279476	2.37335	-3.15743e-10	3
GSE9_UV_60	GEO	cDNA	Aerobic	0.560574	10.8602	18.3754	3
E-TABM-103_t6.1	ArrayExpress	affymetrix	Aerobic	0.587308	4.42727e-10	1.69295e-11	1
GSE1154_MG1655_F_plasmid	GEO	affymetrix	Aerobic	0.150445	9.84654	2.47798e-11	2
GSE7573_metJ_MOPS_DeaNO_5min	GEO	cDNA	Aerobic	1.00077	-7.3752e-11	-2.04753e-11	1
GSE6712_benzalkonium_chloride+50ppm	GEO	p33	Aerobic	0.257693	17.0504	3.47845	1
GSE4778_t10_ph5.5	GEO	affymetrix	Aerobic	0.517135	1.64724	0.00138385	2
GSE6992_wt_paraquat_t2	GEO	affymetrix	Aerobic	0.950227	-4.53252e-11	3.72445e-11	2
GSE7573_wt_MOPS_DeaNO_5min	GEO	cDNA	Aerobic	0.965494	-2.88962e-11	-8.67946e-11	3
GSE9388_4.5h_AI_2	GEO	affymetrix	Aerobic	0.339035	5.17466	15.0035	3
E-MEXP-1166_DHAdp_glu1000g	ArrayExpress	cDNA	Aerobic	0.740007	2.65638	2.26393e-10	3
E-MEXP-732_p5_g21	ArrayExpress	affymetrix	Aerobic	0.849385	1.8147	-1.19988e-11	1
GSE6425_UTI89_aerobic_26	GEO	affymetrix	Aerobic	0.107528	2.19267	1.12726	2
GSE3123_rng_pM30	GEO	cDNA	Aerobic	0.97162	4.46809e-11	-1.06896e-10	3
GSE8540_dpp_GSNO100_5min	GEO	cDNA	Aerobic	0.953752	8.41706e-11	-5.42491e-12	3
GSE8540_cys_suppl_GSNO500_5min	GEO	cDNA	Aerobic	0.63157	12.8701	4.14434e-10	3
GSE8540_nsrR_GSNO500_5min	GEO	cDNA	Aerobic	1.00458	1.07859e-10	-3.82204e-10	3
GSE7573_norR_MOPS_DeaNO_5min	GEO	cDNA	Aerobic	0.281589	3.44583	32.4466	3
GSE5981_rsd_overexpr_stat_phase	GEO	cDNA	Aerobic	0.942357	1.73084e-11	1.59279e-11	1
E-MEXP-1166_MGAdp_glu1000g	ArrayExpress	cDNA	Aerobic	0.551862	5.78498	-1.08208e-09	1
GSE7_15ug/ml_indaa_15min	GEO	cDNA	Aerobic	0.233564	1.28721	-4.54869e-11	1
GSE6195_biofilm	GEO	affymetrix	Aerobic	0.295787	8.01889	1.64391	2
GSE6609_D3_anaerobic_lon	GEO	cDNA	Anaerobic	0.293685	20.3269	-4.42854e-10	3
GSE8965_FA_tp1	GEO	cDNA	Aerobic	0	0	0	2
GSE6425_UTI89_anaerobic_3.5	GEO	affymetrix	Anaerobic	0.327219	5.6644	-4.46268e-09	1
GSE5981_rsd_overexpr_stat_phase	GEO	cDNA	Aerobic	0.525611	5.25546	3.13295e-11	1
GSE7265_WT_tp14	GEO	cDNA	Aerobic	0.345677	7.4948	1.54043	2
GSE11087_relA_ile_starvation	GEO	affymetrix	Aerobic	0.31753	1.84853	-1.18198e-13	2
GSE6426_MG1655	GEO	affymetrix	Aerobic	0.688409	9.73528	7.01856	3
GSE8965_FA_tp1	GEO	cDNA	Aerobic	0.672356	1.46845	-2.26771e-09	2
GSE8965_FA_tp4	GEO	cDNA	Aerobic	0.133832	2.83716	2.34999	2
GSE4394_wt_rif_6min	GEO	cDNA	Aerobic	0.359886	7.22012	0.613205	1
GSE7573_wt_MOPS_DeaNO_5min	GEO	cDNA	Aerobic	0.900284	-9.5407e-11	7.9356e-11	1
GSE4394_rhlB_rif_1.5min	GEO	cDNA	Aerobic	0.933735	1.78773	-1.8109e-10	3
GSE7573_iscR_MOPS_DeaNO_5min	GEO	cDNA	Aerobic	0.67013	6.22652	-1.02614e-10	3
GSE4394_eno	GEO	cDNA	Aerobic	0.948236	1.65092e-10	1.10342e-11	3
GSE3665_mut3_20g/l_etOH	GEO	affymetrix	Aerobic	0.257099	4.76681	3.47615	3
GSE4778_t1_ph5.5	GEO	affymetrix	Aerobic	0.965983	6.21982e-11	7.73296e-11	3
GSE6444_rseA	GEO	cDNA	Aerobic	0.425052	1.48745	8.94563e-10	1
E-MEXP-926_MOPS_glucose_VR50	ArrayExpress	affymetrix	Aerobic	1.0106	-3.25151e-11	3.4307e-11	3
GSE5552_norepinephrine	GEO	affymetrix	Aerobic	0	0	0	2
GSE9814_rpoS	GEO	affymetrix	Aerobic	0.681784	1.6298e-10	3.92143e-10	2
GSE7265_WT_tp16	GEO	cDNA	Aerobic	0.390835	18.3354	-1.58299e-09	1
E-MEXP-953_T48_K12_Biofilm_biofilm_F+Lampda+	ArrayExpress	affymetrix	Aerobic	1.00238	-1.35382e-11	-3.49493e-12	3
GSE6992_soxR_paraquat_t0	GEO	affymetrix	Aerobic	0.230105	9.30841	-3.01844e-10	2
GSE4394_eno_rif_3min	GEO	cDNA	Aerobic	0.221029	3.85061	0.000591474	1
GSE7265_WT_tp6	GEO	cDNA	Aerobic	0.37301	2.6859	4.09395	1
E-MEXP-1166_MGAdp_glu1000g	ArrayExpress	cDNA	Aerobic	0.72188	8.78568	1.62213e-11	1
GSE6425_MG1655_aerobic_18	GEO	affymetrix	Aerobic	0.106117	1.66313	0.493897	2
GSE4394_pnp_rif_6min	GEO	cDNA	Aerobic	0.933102	-3.85248e-11	-8.89579e-11	3
GSE4778_t1_ph5.5	GEO	affymetrix	Aerobic	0.713223	1.55969	0.00190859	3
GSE7573_wt_MOPS_methionine_DeaNO_5min	GEO	cDNA	Aerobic	0.957795	1.34367	-5.21383e-10	1
GSE3123_rng_pM30	GEO	cDNA	Aerobic	0.494711	14.6812	3.06024	3
GSE6923_MG1655_wt_R1drd19_24_m9	GEO	affymetrix	Aerobic	0.948822	-3.32208e-11	1.35655e-11	1
GSE6992_wt_paraquat_t6	GEO	affymetrix	Aerobic	0.382253	5.10029e-10	-2.11723e-10	1
GSE7573_argR_MOPS_DeaNO_5min	GEO	cDNA	Aerobic	0.0670286	19.0004	1.63923e-11	2
GSE3665_mut3_40g/l_etOH	GEO	affymetrix	Aerobic	0.271103	2.25661	5.71186e-12	1
GSE5905_hoxEFUYH_pBSkan	GEO	affymetrix	Aerobic	0.202333	3.48291	1.39893	2
GSE2140_tet_inducible_sig32_t15	GEO	affymetrix	Aerobic	0.113502	4.95856	-1.37785e-09	3
GSE7398_fis_150	GEO	affymetrix	Aerobic	0.182664	2.92039	0.000488806	1
GSE8965_SA_tp3	GEO	cDNA	Aerobic	0.112309	6.2606	8.03157	2
GSE9582_wt	GEO	affymetrix	Aerobic	0.588927	-3.80466e-10	19.5886	2
GSE6712_control	GEO	p33	Aerobic	0.187386	5.83976	5.14013e-10	1
GSE7_15ug/ml_indaa_60min	GEO	cDNA	Aerobic	0.160607	3.25872	-1.11282e-10	3
GSE7265_WT_tp2	GEO	cDNA	Aerobic	1.0073	-3.20912e-11	-1.42476e-11	1
GSE4556_ph8.5	GEO	affymetrix	Aerobic	0	0	0	2
GSE8540_met_suppl_GSNO500_5min	GEO	cDNA	Aerobic	0.985096	5.02789e-10	5.85226e-10	2
GSE7398_wt_360	GEO	affymetrix	Aerobic	0.14921	1.8924	2.91597e-09	1
GSE7398_fis_360	GEO	affymetrix	Aerobic	0.195898	2.98036	1.4604e-09	1
E-MEXP-1001_suspension_stat	ArrayExpress	affymetrix	Aerobic	0.138512	1.88218	-2.58953e-09	1
E-MEXP-584_pat3	ArrayExpress	affymetrix	Aerobic	0.387609	6.80014	-2.29375e-10	3
GSE7_60min	GEO	cDNA	Aerobic	0.0573897	23.4483	1.91961	2
GSE4394_wt_rif_4.5min	GEO	cDNA	Aerobic	0.945446	4.42744e-11	8.09117e-11	2
GSE8706_yncC_biofilm	GEO	affymetrix	Aerobic	0.628874	10.8939	-1.67553e-10	1
GSE7573_norR_MOPS_DeaNO_5min	GEO	cDNA	Aerobic	0.749501	8.93314	2.56901e-10	1
GSE3665_mut3_0g/l_etOH	GEO	affymetrix	Aerobic	0.46418	9.37588	5.1478	3
GSE7573_wt_MOPS_DeaNO_5min	GEO	cDNA	Aerobic	0.76765	1.18332e-09	-4.24182e-10	1
E-MEXP-1166_MGStat_prolonged_stat_phase_37d	ArrayExpress	cDNA	Aerobic	0.537262	5.1836	3.85801e-10	1
GSE3665_mut3_40g/l_etOH	GEO	affymetrix	Aerobic	0.352432	2.56735	-2.74629e-11	1
GSE4569_50h_UV	GEO	cDNA	Aerobic	0.3585	5.10721	-4.91251e-10	3
GSE4383_ptrc99A_rraA_KSL2009	GEO	cDNA	Aerobic	0.369114	18.2673	1.26992e-09	1
GSE6609_D3_anaerobic	GEO	cDNA	Anaerobic	0.329009	4.54021	0.114046	1
GSE2140_tet_inducible_sig32_t0	GEO	affymetrix	Aerobic	0.10144	11.8439	-2.55171e-09	2
GSE4556_ph5.7	GEO	affymetrix	Aerobic	0.821222	0.0039691	-1.57784e-10	1
GSE6609_D3_aerobic	GEO	cDNA	Aerobic	0.386703	10.115	9.06857	3
GSE7265_WT_tp12	GEO	cDNA	Aerobic	0.995115	3.70891e-11	-2.81608e-10	1
E-MEXP-953_T48_K12_Biofilm_biofilm_F+Lampda+	ArrayExpress	affymetrix	Aerobic	0	0	0	2
GSE6444_hfq	GEO	cDNA	Aerobic	0.535935	2.1358	0.00143416	1
GSE4394_wt_rif_1.5min	GEO	cDNA	Aerobic	0.935479	1.36733e-10	0.232088	3
GSE4562_wt_glucose	GEO	affymetrix	Aerobic	0.715081	-1.14298e-10	1.51248e-10	1
E-MEXP-732_p5_g21	ArrayExpress	affymetrix	Aerobic	0.649727	2.38374	4.21214	1
GSE5098_aeroob_NOC5/7	GEO	cDNA	Aerobic	0.520208	2.05854	0.00139208	1
GSE8540_wt_GSNO100_5min	GEO	cDNA	Aerobic	0.897114	5.24703e-12	-5.91216e-11	2
GSE7_50ug/mltrp_15min	GEO	cDNA	Aerobic	0.703589	-2.26355e-10	5.42145e-10	3
GSE8965_SA_tp2	GEO	cDNA	Aerobic	0.219161	3.28123	1.03628e-10	1
GSE4394_RNaseE_N_rif_6min	GEO	cDNA	Aerobic	0.904971	3.68286e-10	-9.45945e-11	3
GSE6781_pGIT1	GEO	cDNA	Aerobic	0.973625	3.752e-11	-6.08725e-10	1
GSE4778_t10_ph5.5	GEO	affymetrix	Aerobic	0.948414	-4.24071e-11	5.38029e-11	1
GSE4383_rraA_OD:0.3	GEO	cDNA	Aerobic	0.904618	-5.48738e-11	-1.14846e-09	1
GSE4562_yceB_glucose_indole	GEO	affymetrix	Aerobic	0.553735	-4.26988e-10	1.17782e-10	1
E-MEXP-1166_DHAdp_glu1000g	ArrayExpress	cDNA	Aerobic	0.869724	4.76792	5.22677e-10	1
GSE6195_biofilm_7_hydroxy_indole	GEO	affymetrix	Aerobic	0.231209	4.7699	1.0573	2
GSE4344_LB_abundance	GEO	cDNA	Aerobic	0.885517	3.76393	-2.61376e-10	3
GSE6296_HEPES	GEO	cDNA	Aerobic	0.335631	9.09649	15.9278	2
GSE7_wt_15ug/ml_inda	GEO	cDNA	Aerobic	0.577221	12.7584	6.29201	3
GSE7398_wt_150	GEO	affymetrix	Aerobic	0.647016	2.17983e-11	-8.79335e-11	2
GSE6712_benzalkonium_chloride+50ppm	GEO	p33	Aerobic	0.429377	1.96463	5.09907	3
GSE7265_WT_tp9	GEO	cDNA	Aerobic	1.0107	-1.64754e-11	-6.32107e-12	1
GSE7573_iscR_MOPS_DeaNO_5min	GEO	cDNA	Aerobic	0.872174	4.23995	0.00233394	3
GSE9388_5.5h_AI_2	GEO	affymetrix	Aerobic	0.762907	9.03091	-1.21784e-09	3
E-MEXP-953_T48_MG1655_Biofilm_biofilm_F_lambda_ilvG_rfb_50_rph_1	ArrayExpress	affymetrix	Aerobic	0.995953	4.21872e-11	-9.23634e-11	3
GSE6425_MG1655_anaerobic_2.5	GEO	affymetrix	Anaerobic	0.239708	2.62427	0.000641458	1
GSE4394_RNaseE_N_rif_6min	GEO	cDNA	Aerobic	0.94213	-4.45044e-11	5.37298e-11	3
E-TABM-103_t6.1	ArrayExpress	affymetrix	Aerobic	0.627337	-1.5511e-09	-2.23132e-11	1
GSE6781_pGIT1_NO2	GEO	cDNA	Aerobic	0	0	0	2
E-MEXP-926_urine_biofilm_VR50	ArrayExpress	affymetrix	Aerobic	0.168889	1.84781	-1.99888e-09	2
E-MEXP-926_urine_83972	ArrayExpress	affymetrix	Aerobic	0.34201	8.0955	0.155603	1
GSE4394_rhlB	GEO	cDNA	Aerobic	0.369047	5.33394	0.000987572	3
GSE9_UV_10	GEO	cDNA	Aerobic	0.476621	7.39793	2.88377	1
E-MEXP-953_T20_MG1655_Stationary_planktonic_F_lambda_ilvG_rfb_50_rph_1	ArrayExpress	affymetrix	Aerobic	0.296958	5.46628	2.57968	1
GSE9_lexA_60	GEO	cDNA	Aerobic	0.602228	6.45951	1.01924e-09	3
GSE8540_nsrR_GSNO500_5min	GEO	cDNA	Aerobic	0.806621	4.24871e-12	-2.32729e-11	3
GSE7573_norR_MOPS_DeaNO_5min	GEO	cDNA	Aerobic	1.01058	6.8663e-11	-2.74049e-10	3
GSE4394_wt_rif_4.5min	GEO	cDNA	Aerobic	0.699895	1.04526	1.66317e-11	2
GSE6444_rseA	GEO	cDNA	Aerobic	1.00397	-1.08199e-10	1.91123e-10	1
E-TABM-103_t16	ArrayExpress	affymetrix	Aerobic	0.533053	3.83528	7.77769e-10	1
GSE11087_wt_ile_starvation	GEO	affymetrix	Aerobic	0.876731	3.47764e-10	-3.42504e-10	1
GSE3123_rne_pBADRNE_noIPTG	GEO	cDNA	Aerobic	0.444514	2.46541e-09	-8.55401e-10	3
GSE5177_cueO	GEO	cDNA	Aerobic	0.543365	3.2466	0.00145404	1
GSE5981_rsd_overexpr_OD1.1	GEO	cDNA	Aerobic	0.538925	6.01619	1.95683e-12	1
GSE2140_tet_inducible_sig32_t15	GEO	affymetrix	Aerobic	0.141491	0.945512	0.00037863	3
GSE4394_rhlB_rif_6min	GEO	cDNA	Aerobic	0.91871	-4.40211e-11	-1.46269e-09	1
GSE7573_arcA_MOPS_DeaNO_5min	GEO	cDNA	Aerobic	1.00395	2.49736e-10	-8.14242e-10	2
GSE7_50ug/mltrp_60min	GEO	cDNA	Aerobic	0.696373	5.27267e-10	2.57505e-09	3
GSE3283_Irp	GEO	cDNA	Aerobic	0.284928	19.7644	8.77506	1
GSE4778_t5_ph5.5	GEO	affymetrix	Aerobic	0.911695	1.17908	9.2084e-12	2
GSE8965_SA_tp1	GEO	cDNA	Aerobic	0.914252	-5.29982e-11	-2.13756e-10	1
GSE8965_SA_tp4	GEO	cDNA	Aerobic	0.18673	3.30292	5.88752	2
E-MEXP-1177_mucus	ArrayExpress	affymetrix	Aerobic	0.251655	7.09056	5.90935	1
GSE4569_1h_UV	GEO	cDNA	Aerobic	0.0838538	4.62637	6.09754	2
E-TABM-103_t5.1	ArrayExpress	affymetrix	Aerobic	0.574387	3.47435	-1.05467e-10	3
GSE7573_wt_MOPS_DeaNO_5min	GEO	cDNA	Aerobic	1.01059	1.73873e-12	3.03911e-11	3
GSE6992_soxR_paraquat_t4	GEO	affymetrix	Aerobic	0.154205	21.5914	8.04227	2
GSE6781_pGIT1	GEO	cDNA	Aerobic	0.422387	5.7328	2.34261	2
GSE3123_rne_pNRNE5	GEO	cDNA	Aerobic	0.196808	3.67071	2.66178	1
GSE7265_WT_tp15	GEO	cDNA	Aerobic	0.105819	3.62729	1.41106	2
E-MEXP-584_pat1	ArrayExpress	affymetrix	Aerobic	0.651616	8.70027	-2.93825e-10	1
GSE6425_MG1655_anaerobic_4.5	GEO	affymetrix	Anaerobic	0.23078	2.35247	-4.448e-10	2
GSE6425_MG1655_aerobic_5	GEO	affymetrix	Aerobic	0.146784	2.1588	-2.06878e-10	2
GSE8540_dpp_GSNO100_5min	GEO	cDNA	Aerobic	0.913045	1.61386e-10	-7.80895e-11	3
GSE6781_pGIT1_NO2	GEO	cDNA	Aerobic	0.202049	9.88693	7.50072	2
GSE7265_WT_tp5	GEO	cDNA	Aerobic	0.343361	7.31372	4.02926	1
E-MEXP-732_p5_g21	ArrayExpress	affymetrix	Aerobic	0.580628	3.31511	6.7328	1
GSE6425_UTI89_aerobic_12	GEO	affymetrix	Aerobic	0.121848	1.99826	0.729225	2
GSE3665_wt	GEO	affymetrix	Aerobic	0.91213	-5.91889e-12	2.3617e-11	2
GSE7573_MOPS_SeOh_5min	GEO	cDNA	Aerobic	0.802958	7.66808	0.00214871	1
E-MEXP-1166_DHAdp_glu1000g	ArrayExpress	cDNA	Aerobic	0.622596	9.94497	-4.41236e-11	1
GSE4394_eno	GEO	cDNA	Aerobic	0.97354	2.88811e-10	-1.6198e-09	3
GSE7573_wt_MOPS_methionine_DeaNO_5min	GEO	cDNA	Aerobic	1.00358	1.4094e-11	3.43039e-10	3
GSE6992_wt_paraquat_t10	GEO	affymetrix	Aerobic	0.457117	6.70985	5.35108	1
GSE6425_UTI89_aerobic_8	GEO	affymetrix	Aerobic	0.155298	2.25931	-3.15496e-09	1
GSE6425_MG1655_anaerobic_6.75	GEO	affymetrix	Anaerobic	0.112284	1.63894	-1.57476e-09	2
GSE7573_argR_MOPS_DeaNO_5min	GEO	cDNA	Aerobic	0.0586443	24.5648	-4.28279e-11	2
GSE4394_RNaseE_N_rif_1.5min	GEO	cDNA	Aerobic	0.969005	-1.39935e-11	5.59178e-11	2
GSE9_UV_20	GEO	cDNA	Aerobic	0.464872	5.82905	-3.55299e-10	1
GSE6712_benzalkonium_chloride	GEO	p33	Aerobic	0.347348	6.07816	1.94711e-10	2
E-MEXP-732_empty	ArrayExpress	affymetrix	Aerobic	1.01025	-1.6009e-11	1.98282e-11	2
GSE8965_SA_tp3	GEO	cDNA	Aerobic	0.843994	2.1048e-11	-6.03269e-11	2
E-TABM-103_t7.8	ArrayExpress	affymetrix	Aerobic	0.475085	3.17457	1.05533e-10	1
GSE7398_fis_150	GEO	affymetrix	Aerobic	0.144054	2.53474	8.39489e-10	2
GSE4394_wt_rif_4.5min	GEO	cDNA	Aerobic	0.857617	6.5894e-12	-7.14007e-12	3
GSE7265_WT_tp1	GEO	cDNA	Aerobic	0.992564	1.66333e-11	8.9156e-12	1
GSE6425_UTI89_anaerobic_3.5	GEO	affymetrix	Anaerobic	0.255843	4.11239	3.02907e-09	1
GSE6712_benzalkonium_chloride+50ppm	GEO	p33	Aerobic	0.521788	8.37549	-8.86635e-12	2
GSE4394_RNaseE_N_rif_6min	GEO	cDNA	Aerobic	0.905041	0.605792	0.00242189	1
GSE6923_BW25113_wt_R1drd19_15_LB	GEO	affymetrix	Aerobic	0.980212	-1.3568e-10	2.20561e-10	3
GSE4778_t0_ph7.6	GEO	affymetrix	Aerobic	0.861504	2.0091e-10	-8.95534e-10	2
GSE7243_phoU	GEO	affymetrix	Aerobic	0.825527	4.20497	2.58141e-10	3
GSE8540_metJ_GSNO500_5min	GEO	cDNA	Aerobic	1.00738	-9.62157e-11	6.45676e-11	2
GSE3123_rne_pRNG3	GEO	cDNA	Aerobic	0.271297	1.71721	-2.93788e-11	1
GSE7_15min	GEO	cDNA	Aerobic	0.240699	1.91129	3.48334	2
GSE8965_SA_tp2	GEO	cDNA	Aerobic	0.812876	1.39542	1.36431e-10	3
GSE4556_ph7.0	GEO	affymetrix	Aerobic	0.760413	9.02433	-1.92639e-10	3
GSE6609_D3_aerobic	GEO	cDNA	Aerobic	0.312794	4.72969	1.57697	1
GSE6992_wt_paraquat_t8	GEO	affymetrix	Aerobic	0.561755	13.4758	-5.64902e-11	3
GSE4569_50h_UV	GEO	cDNA	Aerobic	0.172928	4.44619	4.07313	2
E-MEXP-926_urine_biofilm_VR50	ArrayExpress	affymetrix	Aerobic	0.177308	2.30398	2.38446e-09	2
GSE6925_ymgB_biofilm	GEO	affymetrix	Aerobic	0.481385	15.6225	1.96609	3
GSE6712_benzalkonium_chloride	GEO	p33	Aerobic	0.45152	4.73669	1.42245e-09	1
GSE6444_hfq_rpoEinduced_IPTG	GEO	cDNA	Aerobic	0.564931	5.32619	0.00151175	1
GSE7265_WT_tp12	GEO	cDNA	Aerobic	0.2999	20.6178	-4.16658e-10	1
E-MEXP-953_T10_MG1655_Exponiential_planktonic_F_lambda_ilvG_rfb_50_rph_1	ArrayExpress	affymetrix	Aerobic	0	0	0	2
GSE6425_MG1655_aerobic_26	GEO	affymetrix	Aerobic	0.121891	2.51803	1.44261	2
GSE4394_pnp_rif_4.5min	GEO	cDNA	Aerobic	0.920066	-2.22622e-10	-1.11114e-11	3
GSE6444_hfq	GEO	cDNA	Aerobic	0.800855	6.47919	-3.23478e-10	1
GSE3665_mut1_0g/l_etOH	GEO	affymetrix	Aerobic	0.343835	4.59666	1.94172e-09	3
GSE7398_wt_240	GEO	affymetrix	Aerobic	0.89946	-6.20317e-11	-1.17557e-10	1
E-MEXP-926_urine_83972	ArrayExpress	affymetrix	Aerobic	0.421914	3.63538	1.03725e-10	2
E-MEXP-926_urine_biofilm_VR50	ArrayExpress	affymetrix	Aerobic	0.160578	2.61997	-5.84002e-10	2
GSE5098_aeroob_NOC5/7	GEO	cDNA	Aerobic	0.618888	1.66325	3.6514	1
GSE7573_MOPS_SeOh_5min	GEO	cDNA	Aerobic	0.989781	-3.09398e-12	-2.67664e-11	1
GSE8540_wt_GSNO100_5min	GEO	cDNA	Aerobic	0.529202	2.94502	0.00141614	3
GSE7_tnaA2_trpR2_50ug/ml	GEO	cDNA	Aerobic	0.233748	5.03692	4.82538	1
GSE6426_UTI89	GEO	affymetrix	Aerobic	0	0	0	2
E-MEXP-953_T48_MG1655+pBR322_Biofilm_biofilm_F_lambda_ilvG_rfb_50_rph_1	ArrayExpress	affymetrix	Aerobic	0	0	0	2
GSE4394_rhlB_rif_6min	GEO	cDNA	Aerobic	0.788582	3.23268	4.35213e-10	1
GSE9755_0perc_tannine	GEO	affymetrix	Aerobic	0.250065	17.4514	4.07303e-11	2
GSE3665_wt_20g/l_etOH	GEO	affymetrix	Aerobic	0.373812	6.07847	7.3649e-10	3
GSE6712_benzalkonium_chloride+50ppm	GEO	p33	Aerobic	0.481339	1.5111	9.19413	2
E-TABM-103_t5.1	ArrayExpress	affymetrix	Aerobic	0.678051	3.20004	-2.50634e-10	1
E-MEXP-1001_art_mating_F_phenocopy	ArrayExpress	affymetrix	Aerobic	0.192229	2.1607	1.49218e-09	1
GSE5904_ycfR_15hr_biofilm	GEO	affymetrix	Aerobic	0.899701	3.16692e-11	-6.09524e-11	1
GSE4394_wt_rif_3min	GEO	cDNA	Aerobic	0.806863	1.58022e-10	-7.78282e-10	1
GSE7265_WT_tp8	GEO	cDNA	Aerobic	0.730384	8.70214	-3.73193e-11	1
GSE8965_SA_tp1	GEO	cDNA	Aerobic	0	0	0	2
GSE6425_MG1655_anaerobic_3	GEO	affymetrix	Anaerobic	0.189034	2.51778	1.03556e-09	3
GSE4394_RNaseE_N_rif_3min	GEO	cDNA	Aerobic	0.933714	-7.57989e-11	-7.93742e-11	3
GSE8965_FA_tp2	GEO	cDNA	Aerobic	0.485803	7.99474	2.961	3
E-MEXP-584_MOPS	ArrayExpress	affymetrix	Aerobic	1.01065	-7.72947e-11	2.20816e-11	1
GSE4394_wt_rif_1.5min	GEO	cDNA	Aerobic	0.992591	4.77898e-12	4.76874e-11	3
GSE4383_rraA_OD:0.5	GEO	cDNA	Aerobic	0.46956	-5.57703e-10	-1.47087e-09	1
GSE6609_D1_aerobic	GEO	cDNA	Aerobic	0.271979	-4.5353e-11	1.52614e-10	3
GSE7265_WT_tp13	GEO	cDNA	Aerobic	1.00318	0.27837	4.3524e-11	1
GSE1154_MG1655_F_plasmid	GEO	affymetrix	Aerobic	0.308762	2.23634	3.87129e-10	1
GSE4394_wt_rif_1.5min	GEO	cDNA	Aerobic	0.894523	0.82541	5.57079e-11	3
GSE5098_anaeroob_NOC5/7	GEO	cDNA	Anaerobic	0.910273	2.75834e-11	1.8587e-12	1
E-MEXP-1370_relA_spoT_ILE_40m	ArrayExpress	affymetrix	Aerobic	0.274364	1.06216	1.51018	2
E-MEXP-1370_relA_ILE_40m	ArrayExpress	affymetrix	Aerobic	0.290504	2.98515	3.56328e-10	2
E-MEXP-1370_wt_ILE_40m	ArrayExpress	affymetrix	Aerobic	0.666713	2.30659	-1.44587e-10	1
E-MEXP-1370_relA_spoT_ILE_40m	ArrayExpress	affymetrix	Aerobic	0.0919033	2.35476	0.678554	2
E-MEXP-1370_relA_ILE_40m	ArrayExpress	affymetrix	Aerobic	0.470645	3.5209	1.39919	1
E-MEXP-1370_wt_ILE_40m	ArrayExpress	affymetrix	Aerobic	0.599664	9.04653	-2.52504e-10	1
GSE7265_RpoS_tp1	GEO	cDNA	Aerobic	0.734405	8.84627	-8.58355e-11	1
GSE7265_RpoS_tp1	GEO	cDNA	Aerobic	0.959143	-2.79285e-11	-2.30356e-11	1
GSE7265_RpoS_tp1	GEO	cDNA	Aerobic	0.77709	6.1196	1.33654e-11	1
GSE7265_RpoS_tp2	GEO	cDNA	Aerobic	0.980277	0.867495	-1.99924e-11	1
GSE7265_RpoS_tp2	GEO	cDNA	Aerobic	0.837512	6.25928	2.53366e-11	1
GSE7265_RpoS_tp2	GEO	cDNA	Aerobic	0.997692	-5.54789e-12	1.34338e-11	1
GSE7265_RpoS_tp3	GEO	cDNA	Aerobic	0.328152	4.30238	2.00977e-11	1
GSE7265_RpoS_tp3	GEO	cDNA	Aerobic	0.302982	4.99823	1.84227	3
GSE7265_RpoS_tp3	GEO	cDNA	Aerobic	0.269702	5.82221	5.77208	2
GSE7265_RpoS_tp4	GEO	cDNA	Aerobic	0.894594	2.48294	0.00239393	1
GSE7265_RpoS_tp4	GEO	cDNA	Aerobic	0.808174	2.21758	1.24753e-11	1
GSE7265_RpoS_tp4	GEO	cDNA	Aerobic	0.450972	5.12753	0.0012068	1
GSE7265_RpoS_tp5	GEO	cDNA	Aerobic	0.754973	4.86336	3.77685	1
GSE7265_RpoS_tp5	GEO	cDNA	Aerobic	0.795428	4.13765	3.95978	1
GSE7265_RpoS_tp5	GEO	cDNA	Aerobic	0.491325	2.34252	4.14608	1
GSE7265_RpoS_tp6	GEO	cDNA	Aerobic	0.961954	6.53558e-12	1.69912e-11	1
GSE7265_RpoS_tp6	GEO	cDNA	Aerobic	0.953207	1.75891e-11	-1.82284e-11	1
GSE7265_RpoS_tp7	GEO	cDNA	Aerobic	0.997902	6.79494e-10	1.36571e-10	1
GSE7265_RpoS_tp6	GEO	cDNA	Aerobic	0.933517	1.46505e-10	1.31653e-10	1
GSE7265_RpoS_tp7	GEO	cDNA	Aerobic	0.428786	5.94008	6.68055e-09	1
GSE7265_RpoS_tp7	GEO	cDNA	Aerobic	0.661115	6.08992	-7.44635e-10	1
GSE7265_RpoS_tp8	GEO	cDNA	Aerobic	0.73532	9.36887	-4.69411e-11	3
GSE7265_RpoS_tp8	GEO	cDNA	Aerobic	0.881346	4.03138	5.35847e-12	1
GSE7265_RpoS_tp8	GEO	cDNA	Aerobic	0.809158	6.29557	1.06216	1
GSE7265_RpoS_tp9	GEO	cDNA	Aerobic	0.503427	10.5113	10.6701	3
GSE7265_RpoS_tp9	GEO	cDNA	Aerobic	0.396868	3.10219	2.82253	3
GSE7265_RpoS_tp9	GEO	cDNA	Aerobic	0.467232	11.2156	7.5617	3
GSE7265_RpoS_tp10	GEO	cDNA	Aerobic	0.518562	12.8416	5.46175	3
GSE7265_RpoS_tp10	GEO	cDNA	Aerobic	0.467237	13.6148	4.16896	1
GSE7265_RpoS_tp10	GEO	cDNA	Aerobic	0.441898	11.7808	9.24476	3
GSE7265_RpoS_tp11	GEO	cDNA	Aerobic	0.409938	14.033	16.9255	1
GSE7265_RpoS_tp11	GEO	cDNA	Aerobic	0.389062	11.9429	19.3519	1
GSE7265_RpoS_tp11	GEO	cDNA	Aerobic	0.404597	13.577	12.5378	1
GSE7265_RpoS_tp12	GEO	cDNA	Aerobic	0.390581	10.3404	12.6254	3
GSE7265_RpoS_tp12	GEO	cDNA	Aerobic	0.293545	9.22736	4.14412	1
GSE7265_RpoS_tp12	GEO	cDNA	Aerobic	0.482486	8.10152	6.54029	3
GSE7265_RpoS_tp13	GEO	cDNA	Aerobic	0.419836	1.56601	3.67957	1
GSE7265_RpoS_tp13	GEO	cDNA	Aerobic	0.337889	4.78906	0.000904191	1
GSE7265_RpoS_tp13	GEO	cDNA	Aerobic	0.281424	4.15963	0.000753092	1
GSE7265_Crp_tp2	GEO	cDNA	Aerobic	0.241025	16.0933	-3.26679e-10	1
GSE7265_Crp_tp2	GEO	cDNA	Aerobic	0.670833	1.76066	3.24653e-10	1
GSE7265_Crp_tp2	GEO	cDNA	Aerobic	0.60787	10.9846	1.32932e-09	1
GSE7265_Crp_tp2	GEO	cDNA	Aerobic	0.372567	18.3442	-1.1693e-10	1
GSE7265_Crp_tp5	GEO	cDNA	Aerobic	0.592546	12.2642	-3.29074e-11	1
GSE7265_Crp_tp5	GEO	cDNA	Aerobic	0.917736	0.762061	2.5334e-11	1
GSE7265_Crp_tp5	GEO	cDNA	Aerobic	0.938971	1.2236e-11	-2.98098e-11	1
GSE7265_Crp_tp5	GEO	cDNA	Aerobic	0.652228	5.6378	0.00174536	1
GSE7265_Crp_tp6	GEO	cDNA	Aerobic	0.435556	16.3246	-4.0159e-11	1
GSE7265_Crp_tp6	GEO	cDNA	Aerobic	0.468053	3.75489	4.09297	2
GSE7265_Crp_tp6	GEO	cDNA	Aerobic	0.39163	18.3711	-1.35523e-11	1
GSE7265_Crp_tp6	GEO	cDNA	Aerobic	0.79787	4.95213	4.01072e-11	1
GSE7265_Crp_tp7	GEO	cDNA	Aerobic	0.933355	-1.96892e-12	-3.6249e-11	2
GSE7265_Crp_tp7	GEO	cDNA	Aerobic	0.814226	4.17004	-7.34052e-11	2
GSE7265_Crp_tp7	GEO	cDNA	Aerobic	0.645281	10.6305	-1.2531e-11	2
GSE7265_Crp_tp7	GEO	cDNA	Aerobic	0.399733	17.7657	-2.70456e-11	2
GSE7265_RelA_tp1	GEO	cDNA	Aerobic	0.269929	18.1471	5.99182	3
GSE7265_RelA_tp1	GEO	cDNA	Aerobic	0.480141	14.921	6.23413	3
GSE7265_RelA_tp1	GEO	cDNA	Aerobic	0.406158	16.0091	8.9661	1
GSE7265_RelA_tp2	GEO	cDNA	Aerobic	0.923449	1.28597e-09	-3.3814e-09	3
GSE7265_RelA_tp2	GEO	cDNA	Aerobic	0.976937	0.736029	2.07597e-10	1
GSE7265_RelA_tp2	GEO	cDNA	Aerobic	0.922834	-1.5397e-10	1.26373e-09	1
GSE7265_RelA_tp4	GEO	cDNA	Aerobic	0.530646	13.2028	6.53202	1
GSE7265_RelA_tp4	GEO	cDNA	Aerobic	0.314414	5.72907	8.33353	1
GSE7265_RelA_tp4	GEO	cDNA	Aerobic	0.439301	15.3141	14.1197	3
GSE7265_RelA_tp5	GEO	cDNA	Aerobic	0.468506	14.8037	-4.6212e-10	3
GSE7265_RelA_tp5	GEO	cDNA	Aerobic	0.36951	14.9346	9.21198	1
GSE7265_RelA_tp5	GEO	cDNA	Aerobic	0.550707	12.9017	1.07622e-10	1
GSE7265_RelA_tp6	GEO	cDNA	Aerobic	0.525897	13.5849	6.35675	1
GSE7265_RelA_tp6	GEO	cDNA	Aerobic	0.380574	16.4058	8.21951	1
GSE7265_RelA_tp6	GEO	cDNA	Aerobic	0.992077	-7.00585e-12	7.37146e-11	1
GSE7265_RelA_tp7	GEO	cDNA	Aerobic	0.216805	18.8554	6.94049	1
GSE7265_RelA_tp7	GEO	cDNA	Aerobic	0.223137	18.3429	2.19174	1
GSE7265_RelA_tp7	GEO	cDNA	Aerobic	0.378768	16.5667	1.60806	1
GSE7265_RelA_tp8	GEO	cDNA	Aerobic	0.222879	3.1992	3.56923	1
GSE7265_RelA_tp8	GEO	cDNA	Aerobic	0.293644	13.3275	-7.4496e-12	1
GSE7265_RelA_tp8	GEO	cDNA	Aerobic	0.273272	17.7854	1.54364	1
GSE7265_RelA_tp9	GEO	cDNA	Aerobic	0.313757	14.5116	-1.93645e-09	1
GSE7265_RelA_tp9	GEO	cDNA	Aerobic	0.357062	17.4569	3.39169	1
GSE7265_RelA_tp10	GEO	cDNA	Aerobic	0.195114	1.1123	4.22529	3
GSE7265_RelA_tp9	GEO	cDNA	Aerobic	0.192621	17.6436	1.09081	1
GSE7265_RelA_tp10	GEO	cDNA	Aerobic	0.179631	1.39606	5.35784	3
GSE7265_RelA_tp10	GEO	cDNA	Aerobic	0.223081	1.47414	0.000596966	3
GSE7265_RelA_tp11	GEO	cDNA	Aerobic	0.184582	19.3767	0.43548	1
GSE7265_RelA_tp11	GEO	cDNA	Aerobic	0.375766	1.14393	1.77784	1
GSE7265_RelA_tp11	GEO	cDNA	Aerobic	0.177512	1.72933	2.83595	1
GSE11087_crp_ile_starvation	GEO	affymetrix	Aerobic	0.244712	-2.91834e-10	2.2791e-10	1
GSE11087_crp_ile_starvation	GEO	affymetrix	Aerobic	0.341626	2.20045e-10	-8.9133e-10	1
GSE11087_dksA_ile_starvation	GEO	affymetrix	Aerobic	0.534109	1.3544	4.28901e-11	1
GSE11087_dksA_ile_starvation	GEO	affymetrix	Aerobic	0.819729	-7.45171e-11	4.76273e-13	1
GSE11087_lrp_ile_starvation	GEO	affymetrix	Aerobic	0.469272	2.57305	0.422083	2
GSE11087_lrp_ile_starvation	GEO	affymetrix	Aerobic	0.652183	4.19873	-1.11131e-10	2
GSE11087_rpoS_ile_starvation	GEO	affymetrix	Aerobic	0.293066	2.17723	1.21332e-09	1
GSE11087_rpoS_ile_starvation	GEO	affymetrix	Aerobic	0.828408	2.23497	-3.15357e-09	1
GSE11087_wt_iso	GEO	affymetrix	Aerobic	0.805556	7.6266	7.87192e-11	3
GSE11087_ile_starvation_T340m	GEO	affymetrix	Aerobic	0.895587	1.3782e-10	-4.57877e-11	3
GSE11087_ile_starvation_T370m	GEO	affymetrix	Aerobic	0.914661	-2.2257e-10	1.40851e-10	1
GSE11087_ile_starvation_T380m	GEO	affymetrix	Aerobic	0.854256	4.2091e-12	1.63172e-10	1
GSE11087_ile_starvation_T390m	GEO	affymetrix	Aerobic	0.874676	-3.80268e-10	-9.49047e-12	1
GSE11087_ile_starvation_T395m	GEO	affymetrix	Aerobic	0.455131	2.58301	-4.5462e-09	1
GSE11087_ile_starvation_T400m	GEO	affymetrix	Aerobic	0.701522	-2.39182e-11	5.96919e-11	3
GSE11087_ile_starvation_T410m	GEO	affymetrix	Aerobic	0.463696	-3.54615e-10	-1.16026e-10	3
GSE11087_ile_starvation_T420m	GEO	affymetrix	Aerobic	0.566172	-9.87911e-11	-3.50007e-10	3
GSE11087_ile_starvation_T430m	GEO	affymetrix	Aerobic	0.541381	-2.59842e-10	1.41454e-10	3
GSE11087_ile_starvation_T445m	GEO	affymetrix	Aerobic	0.507394	-9.58647e-11	-4.25853e-11	1
GSE11087_ile_starvation_T460m	GEO	affymetrix	Aerobic	0.409957	6.1905e-10	-6.81173e-10	3
GSE11087_ile_starvation_T493m	GEO	affymetrix	Aerobic	0.535581	-3.34751e-10	-2.30081e-10	2
GSE12750_5FU	GEO	affymetrix	Aerobic	0.347741	21.0003	5.96957e-10	2
GSE12750	GEO	affymetrix	Aerobic	0.419828	18.7103	4.75068e-12	3
GSE12750_5FU	GEO	affymetrix	Aerobic	0.383822	19.5817	4.13178e-11	3
GSE18362_biofilm	GEO	p33	Aerobic	0.671228	2.81065	6.68491e-10	2
GSE18362_biofilm	GEO	p33	Aerobic	0.699661	4.85704e-09	1.10449e-10	1
GSE14796_WT_infusion	GEO	affymetrix	Aerobic	0.576871	4.85636	0.00154371	1
GSE14796_WT_infusion_sucrose_MgSO4	GEO	affymetrix	Aerobic	1.01064	-2.94822e-11	-1.9303e-11	3
GSE14796_WT_infusion_sucrose_MgSO4	GEO	affymetrix	Aerobic	0.804399	7.67408	5.26115e-11	1
GSE14796_WT_infusion_sucrose_MgSO4	GEO	affymetrix	Aerobic	0.744602	8.8974	2.58797	1
GSE14796_Lform_infusion_sucrose_MgSO4_PenG	GEO	affymetrix	Aerobic	0.334365	17.405	1.96874	1
GSE14796_Lform_infusion_sucrose_MgSO4_PenG	GEO	affymetrix	Aerobic	0.357358	17.5844	1.15882	1
GSE14796_Lform_infusion_sucrose_MgSO4_PenG	GEO	affymetrix	Aerobic	0.37599	17.1964	1.93614	1
GSE15050_qseF_DMEM_None	GEO	affymetrix	Aerobic	0.533106	-1.28839e-10	-1.96768e-09	3
GSE15050_wt_DMEM_AI3	GEO	affymetrix	Aerobic	0.563978	4.32775	0.0015092	2
GSE15050_wt_DMEM_EPI	GEO	affymetrix	Aerobic	0.22052	6.46352	12.9028	3
GSE15050_kdpE_DMEM_None	GEO	affymetrix	Aerobic	0	0	0	2
GSE15050_wt_LB_None	GEO	affymetrix	Aerobic	0.345761	0.710504	-1.72809e-09	2
GSE15050_qseB_DMEM_None	GEO	affymetrix	Aerobic	0.321533	4.3168	1.05204	1
GSE15050_qseC_DMEM_None	GEO	affymetrix	Aerobic	0.420171	7.09728	4.13341	1
GSE15050_qseC_DMEM_AI3	GEO	affymetrix	Aerobic	0.330461	4.00346	0.000884314	1
GSE15050_qseC_DMEM_EPI	GEO	affymetrix	Aerobic	0.418541	5.96069	0.647157	1
GSE15050_qseC_LB_None	GEO	affymetrix	Aerobic	0.170409	1.74538	8.35993e-10	2
GSE13048_CO-RM_anaer	GEO	cDNA	Anaerobic	0.147422	1.12697	-2.72428e-09	1
GSE13048_CO-RM_anaer	GEO	cDNA	Anaerobic	0.495428	10.095	11.0946	1
GSE21839_WT	GEO	affymetrix	Aerobic	1.01059	-7.52719e-10	4.06594e-10	3
GSE21839_WT	GEO	affymetrix	Aerobic	1.01014	2.94066e-10	-1.27005e-10	2
GSE21839_WT_-O2	GEO	affymetrix	Anaerobic	0.581471	4.64508	2.40734e-11	1
GSE21839_WT_-O2	GEO	affymetrix	Anaerobic	0.799305	-3.25046e-10	-3.23859e-10	3
GSE21839_WT_-O2	GEO	affymetrix	Anaerobic	0.52516	7.70973	2.4622e-11	1
GSE21839_E4	GEO	affymetrix	Aerobic	0.880695	0.702303	2.46027e-11	1
GSE21839_E4	GEO	affymetrix	Aerobic	0.820582	2.18448	-2.67482e-10	1
GSE21839_E4	GEO	affymetrix	Aerobic	0.615009	7.61137	2.69333e-11	1
GSE21839_E4_-O2	GEO	affymetrix	Anaerobic	0.713283	-3.98888e-11	4.84449e-12	1
GSE21839_E4_-O2	GEO	affymetrix	Anaerobic	0.742167	-9.62516e-10	3.45138e-10	1
GSE21839_E4_-O2	GEO	affymetrix	Anaerobic	0.523067	5.20558	-6.76256e-11	1
GSE15500	GEO	affymetrix	Aerobic	0.322092	12.4245	9.72869e-11	1
GSE15500	GEO	affymetrix	Aerobic	0.253979	13.6927	1.79191e-10	1
GSE15500	GEO	affymetrix	Aerobic	0.450988	9.89967	8.28606e-11	1
GSE15500	GEO	affymetrix	Aerobic	0.27111	18.3473	15.0668	1
GSE15500	GEO	affymetrix	Aerobic	0.288787	18.452	14.3202	1
GSE15500	GEO	affymetrix	Aerobic	0.223826	20.1215	12.9553	1
GSE15500	GEO	affymetrix	Aerobic	0.315401	3.12161	-6.88637e-11	2
GSE15500	GEO	affymetrix	Aerobic	0.335596	1.53616	1.87998e-10	3
GSE15500	GEO	affymetrix	Aerobic	0.281093	3.86196	2.92951e-10	2
GSE15500	GEO	affymetrix	Aerobic	0.996636	-7.60604e-11	2.01002e-12	3
GSE15500	GEO	affymetrix	Aerobic	1.00138	-1.4698e-10	-3.62727e-11	2
GSE12797_Statio WT	GEO	affymetrix	Aerobic	0.295213	5.86213	3.41925	1
GSE12797_Statio WT	GEO	affymetrix	Aerobic	0.235867	3.59549	-9.66804e-10	1
GSE12797_Expon rpoS	GEO	affymetrix	Aerobic	0.245127	3.90354e-10	1.36447e-09	1
GSE12797_Expon rpoS	GEO	affymetrix	Aerobic	0.34554	1.2947e-11	1.03989e-10	3
GSE12797_Expon rpoS	GEO	affymetrix	Aerobic	0.384732	1.35596e-10	2.41797e-11	3
GSE12797_Stat rpoS	GEO	affymetrix	Aerobic	0.236033	4.57917	1.02567	2
GSE12797_Stat rpoS	GEO	affymetrix	Aerobic	0.275362	2.79053	1.02454e-11	1
GSE12797_Stat rpoS	GEO	affymetrix	Aerobic	0.248704	2.25487	1.43782e-10	1
GSE12797_Expon WT	GEO	affymetrix	Aerobic	0.5046	16.3309	4.80479e-11	3
GSE12797_Expon WT	GEO	affymetrix	Aerobic	0.691214	4.77134	-4.87806e-10	1
GSE12797_Statio WT	GEO	affymetrix	Aerobic	0.303435	5.66786	2.96286	1
GSE13048_CO-RM_anaer	GEO	cDNA	Anaerobic	0.101909	1.05639	-1.40939e-09	2
GSE13048_CO-RM_anaer	GEO	cDNA	Anaerobic	0.485211	3.31792	3.48632	3
GSE13048_CO-RM_anaer	GEO	cDNA	Anaerobic	0.789172	1.85462e-09	-2.19362e-09	1
GSE13048_CO-RM_anaer	GEO	cDNA	Anaerobic	0.384613	12.6092	2.06218	1
GSE13048_CO-RM_anaer	GEO	cDNA	Anaerobic	0.838827	-1.24598e-11	-1.65283e-10	1
GSE13048_CO-RM_anaer	GEO	cDNA	Anaerobic	0.332288	6.06024	12.3144	1
GSE10158_untreated_0min_rep2	GEO	affymetrix	Aerobic	0.959427	-3.92588e-11	1.0108e-10	1
GSE10158_untreated_0min_rep3	GEO	affymetrix	Aerobic	0.550607	3.21562	3.27363e-09	1
GSE10158_untreated_10min_rep1	GEO	affymetrix	Aerobic	0.608276	3.00255	1.07386e-09	1
GSE10158_untreated_10min_rep2	GEO	affymetrix	Aerobic	0.435408	2.35781	5.4962e-09	3
GSE10158_untreated_25min_rep1	GEO	affymetrix	Aerobic	0.70441	1.12129	0.001885	1
GSE10158_untreated_25min_rep2	GEO	affymetrix	Aerobic	0.26109	1.44385	0.000698677	2
GSE10158_untreated_25min_rep3	GEO	affymetrix	Aerobic	0.483202	3.17476	0.00129305	3
GSE10158_untreated_45min_rep1	GEO	affymetrix	Aerobic	0.361497	1.78826	0.000967364	3
GSE10158_untreated_45min_rep2	GEO	affymetrix	Aerobic	0.634221	1.88329	0.00169717	3
GSE10158_untreated_45min_rep3	GEO	affymetrix	Aerobic	0.226077	1.63597	0.000604983	3
GSE10158_untreated_45min_rep4_1	GEO	affymetrix	Aerobic	0.6374	1.86614	4.7146	1
GSE10158_cefsulodin10_0min_rep1	GEO	affymetrix	Aerobic	0.47915	9.08881	0.223005	3
GSE10158_cefsulodin10_0min_rep2	GEO	affymetrix	Aerobic	0.858915	3.46125	0.00229846	3
GSE10158_cefsulodin10_10min_rep1	GEO	affymetrix	Aerobic	0.324624	2.72717	-1.54738e-10	3
GSE10158_cefsulodin10_10min_rep2	GEO	affymetrix	Aerobic	0.747252	3.23858	0.00199964	3
GSE10158_cefsulodin10_25min_rep1	GEO	affymetrix	Aerobic	0.28083	1.09092	0.000751502	1
GSE10158_cefsulodin10_25min_rep2	GEO	affymetrix	Aerobic	0.273431	1.1806	0.000731701	2
GSE10158_cefsulodin10_45min_rep1	GEO	affymetrix	Aerobic	0	0	0	2
GSE10158_cefsulodin10_45min_rep2	GEO	affymetrix	Aerobic	0.612811	1.70423	-2.04108e-10	2
GSE10158_cefsulodin10_45min_rep3	GEO	affymetrix	Aerobic	0.52396	2.17412	4.38896e-10	3
GSE10158_mecillinam0.03_0min_rep1	GEO	affymetrix	Aerobic	0.353295	3.95151	2.43985e-10	3
GSE10158_mecillinam0.03_0min_rep2	GEO	affymetrix	Aerobic	0.943268	3.00378e-10	-9.4052e-10	3
GSE10158_mecillinam0.03_10min_rep1	GEO	affymetrix	Aerobic	0.436411	2.13078	4.59362e-10	3
GSE10158_mecillinam0.03_10min_rep2	GEO	affymetrix	Aerobic	0.54077	1.37739	-1.60498e-10	3
GSE10158_mecillinam0.03_25min_rep1	GEO	affymetrix	Aerobic	0.403153	1.23295	0.00107884	3
GSE10158_mecillinam0.03_25min_rep2	GEO	affymetrix	Aerobic	0.282195	1.47151	0.000755154	1
GSE10158_mecillinam0.03_45min_rep1	GEO	affymetrix	Aerobic	0	0	0	2
GSE10158_mecillinam0.03_45min_rep2	GEO	affymetrix	Aerobic	0.797139	1.42778	2.13642e-11	2
GSE10158_mecillinam0.03_45min_rep3	GEO	affymetrix	Aerobic	0.210956	1.51085	0.000564519	3
GSE10158_cefmec10_0min_rep1	GEO	affymetrix	Aerobic	0.914305	-1.1813e-10	-1.09928e-10	3
GSE10158_cefmec10_0min_rep2	GEO	affymetrix	Aerobic	0.622718	3.72789	6.13774e-09	3
GSE10158_cefmec10_0min_rep3	GEO	affymetrix	Aerobic	0.931309	8.95199e-12	-2.36167e-11	3
GSE10158_cefmec10_10min_rep1	GEO	affymetrix	Aerobic	0.881569	1.42856	4.05765e-10	3
GSE10158_cefmec10_10min_rep2	GEO	affymetrix	Aerobic	0.773553	4.99378	-8.06035e-11	3
GSE10158_cefmec10_10min_rep3	GEO	affymetrix	Aerobic	0.680348	4.409	9.45147e-11	3
GSE10158_cefmec10_25min_rep1	GEO	affymetrix	Aerobic	0.646332	1.24569	2.76768	2
GSE10158_cefmec10_25min_rep2	GEO	affymetrix	Aerobic	0.338896	1.74241	0.000906885	1
GSE10158_cefmec10_25min_rep3	GEO	affymetrix	Aerobic	0.431656	1.6305	0.00115511	3
GSE10158_cefmec10_45min_rep1	GEO	affymetrix	Aerobic	0.584568	6.84448e-11	4.17347e-11	3
GSE10158_cefmec10_45min_rep2	GEO	affymetrix	Aerobic	0.614798	2.08996	7.829	2
GSE10158_cefmec10_45min_rep3	GEO	affymetrix	Aerobic	0.389768	1.7045	0.00104302	3
GSE10158_cefmec10_45min_rep4_1	GEO	affymetrix	Aerobic	0.482724	2.15216	0.00129176	1
GSE34275	GEO	affymetrix	Aerobic	1.01054	-4.31184e-11	9.8953e-11	3
GSE34275	GEO	affymetrix	Aerobic	1.01054	-3.65154e-10	4.3271e-10	3
GSE34275	GEO	affymetrix	Aerobic	0.971171	1.82008e-11	8.6546e-11	3
GSE34275	GEO	affymetrix	Aerobic	0.962516	-3.60381e-11	1.33983e-10	2
GSE34275	GEO	affymetrix	Aerobic	0.965758	1.23895e-10	-2.05269e-11	3
GSE34275	GEO	affymetrix	Aerobic	0.358221	11.5539	20.3276	1
GSE34275	GEO	affymetrix	Aerobic	0.419919	7.73889	25.9408	1
GSE34275	GEO	affymetrix	Aerobic	0.698385	8.49284	3.87001	3
GSE34275	GEO	affymetrix	Aerobic	0.889491	3.14884	2.64271e-11	1
GSE34275	GEO	affymetrix	Aerobic	0.52814	6.24764	0.0014133	1
GSE34275	GEO	affymetrix	Aerobic	0.745649	7.60632	1.08839e-10	1
GSE28795_pGB2_ppGpp0	GEO	affymetrix	Aerobic	1.00976	-4.54756e-12	-3.81862e-11	2
GSE28795_pA_ppGpp0	GEO	affymetrix	Aerobic	1.00316	7.46458e-13	-9.10737e-11	3
GSE28795_pA_ppGpp0	GEO	affymetrix	Aerobic	0.993925	6.50044e-11	-2.31948e-10	3
GSE28795_pB_ppGpp0	GEO	affymetrix	Aerobic	1.01055	2.21115e-12	-1.94304e-11	3
GSE28795_pB_ppGpp0	GEO	affymetrix	Aerobic	1.01064	1.5168e-11	-6.16918e-11	3
GSE28795_dskA-_pGB2_ppGpp0	GEO	affymetrix	Aerobic	0.469991	3.75085	0.0012577	2
GSE28795_dskA-_pGB2_ppGpp0	GEO	affymetrix	Aerobic	0.711568	4.11633	0.00190415	3
GSE28795_dskA-_pA_ppGpp0	GEO	affymetrix	Aerobic	0.32493	3.03388	12.1976	2
GSE28795_dskA-_pA_ppGpp0	GEO	affymetrix	Aerobic	0.461575	5.15682	11.8294	2
GSE28795_dskA-_pB_ppGpp0	GEO	affymetrix	Aerobic	0.337065	10.3234	1.37675	3
GSE28795_dskA-_pB_ppGpp0	GEO	affymetrix	Aerobic	0.367277	14.3049	3.36112	3
GSE15533_O157:H7_chlorine	GEO	affymetrix	Aerobic	0.60869	-3.74324e-10	9.77607e-11	1
GSE15533_TW_chlorine	GEO	affymetrix	Aerobic	0.425128	15.5278	2.43523e-11	1
GSE15533_O157:H7_H2O2	GEO	affymetrix	Aerobic	1.01022	5.94113e-11	4.89387e-11	2
GSE15533_TW_H2O2	GEO	affymetrix	Aerobic	0.981381	2.70263e-11	-4.54087e-11	2
GSE15533_TW	GEO	affymetrix	Aerobic	0.960839	-2.00576e-11	6.21955e-11	2
GSE15533_O157:H7_chlorine	GEO	affymetrix	Aerobic	0.614772	1.1669	-2.87661e-11	1
GSE15533_TW-chlorine	GEO	affymetrix	Aerobic	0.678991	-1.16126e-12	2.79072e-11	1
GSE15533_O157:H7-H2O2	GEO	affymetrix	Aerobic	0.383063	3.9306	0.543429	3
GSE15533_TW_H2O2	GEO	affymetrix	Aerobic	0.339386	4.97924	2.04992	3
GSE15533_O157:H7	GEO	affymetrix	Aerobic	0.987867	1.17909e-10	-2.86716e-10	2
GSE15533_TW	GEO	affymetrix	Aerobic	1.0042	1.16597e-10	1.53516e-11	2
GSE9923_BW25113_tnaA_biofilm_30C	GEO	affymetrix	Aerobic	0.391817	15.455	3.61695e-10	1
GSE9923_BW25113_tnaA_biofilm_indole100uM_30C	GEO	affymetrix	Aerobic	0.983859	-1.99186e-11	2.67513e-11	3
GSE9923_BW25113_wt_biofilm_30C	GEO	affymetrix	Aerobic	0.401925	18.4413	-2.15954e-09	1
GSE9923_BW25113_sdiA_planktonic_30C	GEO	affymetrix	Aerobic	0.534689	2.42075	1.50051e-08	2
ref_GSE9923_BW25113_luxS_planktonic_37C	GEO	affymetrix	Aerobic	0.65264	8.2498	8.2813e-12	1
ref_GSE9923_BW25113_tnaA_biofilm_37C	GEO	affymetrix	Aerobic	0.22031	3.50727	2.53655e-10	2
GSE29486_control t1	GEO	affymetrix	Aerobic	0.533514	3.23441	0.00142769	3
GSE29486_control t2	GEO	affymetrix	Aerobic	0.700581	3.82326	0.00187475	3
GSE29486__control t3	GEO	affymetrix	Aerobic	0.609204	12.7384	1.80666e-11	3
GSE29486__control t4	GEO	affymetrix	Aerobic	0.710664	3.55562	0.00190174	3
GSE29486__control t5	GEO	affymetrix	Aerobic	0.64573	6.34373	1.19848e-09	1
GSE29486_Indol t0	GEO	affymetrix	Aerobic	0.876721	4.86282	0.0023461	3
GSE29486_Indol t1	GEO	affymetrix	Aerobic	0.488223	3.32848	-2.4163e-09	1
GSE29486_Indol t2	GEO	affymetrix	Aerobic	0.664659	4.35305	0.00177863	1
GSE29486_Indol t3	GEO	affymetrix	Aerobic	0.503159	3.3668	1.04955e-08	1
GSE29486_Indol t4	GEO	affymetrix	Aerobic	0.652521	2.45301	0.00174615	1
GSE17519_0%Sodium benzoate_0min	GEO	affymetrix	Aerobic	0.997483	2.68854e-12	-5.57096e-11	2
GSE17519_0.5%Sodium benzoate_0min	GEO	affymetrix	Aerobic	0.375707	3.26958	2.71327	1
GSE17519_0.5%Sodium benzoate_0min	GEO	affymetrix	Aerobic	0.55252	4.74763	12.5472	1
ref_GSE17519_0%Sodium benzoate_5min	GEO	affymetrix	Aerobic	0.596063	7.60949	20.9168	1
ref_GSE17519_0%Sodium benzoate_15min	GEO	affymetrix	Aerobic	0.52684	1.27061	19.3578	3
ref_GSE17519_0%Sodium benzoate_30min	GEO	affymetrix	Aerobic	0.340224	0.872032	13.9817	3
ref_GSE17519_0%Sodium benzoate_60min	GEO	affymetrix	Aerobic	0.575413	0.817897	10.6075	1
GSE17519_0%Sodium benzoate_5min	GEO	affymetrix	Aerobic	0.703475	4.99392	20.1071	1
GSE17519_0.5%Sodium benzoate_5min	GEO	affymetrix	Aerobic	0.589091	8.25551	2.15328e-11	1
GSE17519_0.5%Sodium benzoate_5min	GEO	affymetrix	Aerobic	0.953425	-6.45975e-11	1.41451e-10	1
GSE17519_0%Sodium benzoate_15min	GEO	affymetrix	Aerobic	1.00671	-1.11313e-11	-4.71866e-10	2
GSE17519_0.5%Sodium benzoate_15min	GEO	affymetrix	Aerobic	0.915382	0.11464	-6.05502e-11	1
GSE17519_0.5%Sodium benzoate_15min	GEO	affymetrix	Aerobic	0.799703	5.43144	1.07356e-11	3
GSE17519_0%Sodium benzoate_30min	GEO	affymetrix	Aerobic	1.00636	-4.88062e-10	7.95223e-10	2
GSE17519_0.5%Sodium benzoate_30min	GEO	affymetrix	Aerobic	0.427822	15.3612	3.5163	1
GSE17519_0.5%Sodium benzoate_30min	GEO	affymetrix	Aerobic	0.43263	14.7642	3.06819e-10	1
GSE17519_0%Sodium benzoate_60min	GEO	affymetrix	Aerobic	1.01033	4.7544e-10	2.78391e-10	2
GSE17519_0.5%Sodium benzoate_60min	GEO	affymetrix	Aerobic	0.414488	5.04799	-2.71344e-09	3
GSE17519_0.5%Sodium benzoate_60min	GEO	affymetrix	Aerobic	0.435477	4.11005	-7.35479e-12	3
GSE6033_T2	GEO	cDNA	Aerobic	0.666762	9.50925	2.79744	2
GSE6033_T1	GEO	cDNA	Aerobic	0.792274	8.12076	1.28477e-10	3
GSE6033_T3	GEO	cDNA	Aerobic	0.932063	1.29803	-2.25711e-11	1
GSE6033_T4	GEO	cDNA	Aerobic	1.01044	1.86761e-11	1.14648e-11	3
GSE6033_T5	GEO	cDNA	Aerobic	0.980224	1.22741e-11	2.27705e-10	2
GSE6033_T6	GEO	cDNA	Aerobic	0.511797	7.4382	-8.55561e-09	2
GSE6033_T7	GEO	cDNA	Aerobic	0.154406	2.01806	7.76055	2
GSE6033_T8	GEO	cDNA	Aerobic	0.307431	-5.29415e-11	6.14189e-12	2
GSE6033_T9	GEO	cDNA	Aerobic	0.190189	2.2333	0.000508945	2
GSE6033_T10	GEO	cDNA	Aerobic	0.187794	2.37913	0.74929	2
GSE6033_T11	GEO	cDNA	Aerobic	0.178959	1.49109	0.547624	2
GSE6033_T1	GEO	cDNA	Aerobic	0.565372	5.22059	-3.74891e-10	3
GSE6033_T2	GEO	cDNA	Aerobic	0.333592	14.9373	1.95254e-09	2
GSE6033_T3	GEO	cDNA	Aerobic	0.362534	15.1141	10.5294	3
GSE6033_T4	GEO	cDNA	Aerobic	0.9256	0.843483	-7.2596e-10	3
GSE6033_T5	GEO	cDNA	Aerobic	0.725986	5.94402	0.00194274	2
GSE6033_T6	GEO	cDNA	Aerobic	0.724255	4.92113	1.14901e-09	2
GSE6033_T7	GEO	cDNA	Aerobic	0.474847	-1.86802e-09	1.75669e-10	2
GSE6033_T8	GEO	cDNA	Aerobic	0.419897	3.04742	0.00112364	1
GSE6033_T9	GEO	cDNA	Aerobic	0.228349	3.21652	0.683482	2
GSE6033_T10	GEO	cDNA	Aerobic	0.200665	2.60129	0.438593	2
GSE6033_T11	GEO	cDNA	Aerobic	0.177626	1.35767	0.000475327	2
GSE33147_lac2_day20_rep1	GEO	affymetrix	Aerobic	0	0	0	2
GSE33147_lac2_day20_rep2	GEO	affymetrix	Aerobic	0	0	0	2
GSE33147_lac2_day20_rep3	GEO	affymetrix	Aerobic	0.121268	5.71545	-1.69371e-09	2
GSE33147_lac2_day60_rep1	GEO	affymetrix	Aerobic	0	0	0	2
GSE33147_lac2_day60_rep2	GEO	affymetrix	Aerobic	0	0	0	2
GSE33147_lac2_day60_rep3	GEO	affymetrix	Aerobic	0	0	0	2
GSE33147_lac3_day20_rep1	GEO	affymetrix	Aerobic	0.952523	-9.84571e-10	3.44761e-10	3
GSE33147_lac3_day20_rep2	GEO	affymetrix	Aerobic	0.505304	2.85314	0.00135226	1
GSE33147_lac3_day20_rep3	GEO	affymetrix	Aerobic	0.398407	9.17061e-10	3.1343e-09	3
GSE33147_lac3_day60_rep1	GEO	affymetrix	Aerobic	0.2185	8.53316e-12	1.11478e-11	1
GSE33147_lac3_day60_rep2	GEO	affymetrix	Aerobic	0	0	0	2
GSE33147_lac3_day60_rep3	GEO	affymetrix	Aerobic	0.310534	-1.47544e-09	1.65245e-09	3
GSE33147_lacA_day20_rep1	GEO	affymetrix	Aerobic	0	0	0	2
GSE33147_lacA_day20_rep2	GEO	affymetrix	Aerobic	0.559749	3.27229	8.42567e-09	1
GSE33147_lacA_day20_rep3	GEO	affymetrix	Aerobic	0.34068	3.98421	-2.5895e-10	1
GSE33147_lacA_day60_rep1	GEO	affymetrix	Aerobic	0.977654	-4.04117e-10	-3.34102e-09	3
GSE33147_lacA_day60_rep2	GEO	affymetrix	Aerobic	0.985684	3.884e-12	1.00723e-11	2
GSE33147_lacA_day60_rep3	GEO	affymetrix	Aerobic	0.562403	1.93504e-09	-3.32755e-09	3
GSE33147_lacA_day60_rep4	GEO	affymetrix	Aerobic	0.0986005	-7.57574e-09	1.11725e-09	2
GSE33147_lacB_day20_rep1	GEO	affymetrix	Aerobic	0	0	0	2
GSE33147_lacB_day20_rep2	GEO	affymetrix	Aerobic	0	0	0	2
GSE33147_lacB_day20_rep3	GEO	affymetrix	Aerobic	0	0	0	2
GSE33147_lacB_day60_rep1	GEO	affymetrix	Aerobic	0	0	0	2
GSE33147_lacB_day60_rep2	GEO	affymetrix	Aerobic	0.0148485	0	-2.75532e-08	2
GSE33147_lacB_day60_rep3	GEO	affymetrix	Aerobic	0.63369	7.09526e-10	-3.18649e-09	3
GSE33147_lacC_day20_rep1	GEO	affymetrix	Aerobic	0.97515	-1.96447e-11	-2.91222e-11	3
GSE33147_lacC_day20_rep2	GEO	affymetrix	Aerobic	0.483861	-5.38606e-10	1.85432e-10	2
GSE33147_lacC_day20_rep3	GEO	affymetrix	Aerobic	0	0	0	2
GSE33147_lacC_day60_rep1	GEO	affymetrix	Aerobic	0.36308	-1.54088e-09	-1.26667e-09	2
GSE33147_lacC_day60_rep2	GEO	affymetrix	Aerobic	0.638431	-7.59593e-10	1.29638e-09	2
GSE33147_lacC_day60_rep3	GEO	affymetrix	Aerobic	0.809042	7.47924e-10	-4.75994e-10	2
GSE33147_lacD_day20_rep1	GEO	affymetrix	Aerobic	0.569083	1.67333e-11	-5.09531e-10	3
GSE33147_lacD_day20_rep2	GEO	affymetrix	Aerobic	0.246722	2.1067e-11	-6.52828e-12	2
GSE33147_lacD_day20_rep3	GEO	affymetrix	Aerobic	0	0	0	2
GSE33147_lacD_day60_rep1	GEO	affymetrix	Aerobic	0	0	0	2
GSE33147_lacD_day60_rep2	GEO	affymetrix	Aerobic	0	0	0	2
GSE33147_lacD_day60_rep3	GEO	affymetrix	Aerobic	0	0	0	2
GSE33147_lacE_day20_rep1	GEO	affymetrix	Aerobic	0	0	0	2
GSE33147_lacE_day20_rep2	GEO	affymetrix	Aerobic	0.50996	11.377	14.0374	1
GSE33147_lacE_day20_rep3	GEO	affymetrix	Aerobic	0.746439	-2.95919e-09	5.24692e-10	3
GSE33147_lacE_day60_rep1	GEO	affymetrix	Aerobic	0	0	0	2
GSE33147_lacE_day60_rep2	GEO	affymetrix	Aerobic	0	0	0	2
GSE33147_lacE_day60_rep3	GEO	affymetrix	Aerobic	0.315808	9.21195e-10	-1.83713e-09	2
GSE33147_wt_rep2	GEO	affymetrix	Aerobic	0.475406	1.93372e-10	-4.90192e-10	2
GSE33147_wt_rep3	GEO	affymetrix	Aerobic	0	0	0	2
GSE33147_wt_rep4	GEO	affymetrix	Aerobic	0.725911	9.10976	-1.14089e-11	1
GSE33147_wt_rep5	GEO	affymetrix	Aerobic	0.599073	7.18776	6.01421	2
GSE33147_wt_rep6	GEO	affymetrix	Aerobic	0	0	0	2
GSE10159_untreated_10min	GEO	affymetrix	Aerobic	0.595885	11.1859	-9.27484e-10	3
GSE10159_untreated_10min	GEO	affymetrix	Aerobic	0.932803	-9.13059e-12	-1.47858e-11	3
GSE10159_untreated_10min	GEO	affymetrix	Aerobic	0.967488	-4.17014e-11	-6.89342e-11	2
GSE10159_untreated_60min	GEO	affymetrix	Aerobic	0.649548	2.90617	0.00173819	2
GSE10159_untreated_60min	GEO	affymetrix	Aerobic	0.551999	5.53611	0.00147715	2
GSE10159_untreated_60min	GEO	affymetrix	Aerobic	0	0	0	2
GSE10159_untreated_40min	GEO	affymetrix	Aerobic	0.952423	8.58634e-11	-4.93653e-11	2
GSE10159_treated_cefsulodin60_5min	GEO	affymetrix	Aerobic	1.0055	0.183044	4.89825e-11	3
GSE10159_treated_cefsulodin60_5min	GEO	affymetrix	Aerobic	0.949812	1.11735	-3.13657e-10	3
GSE10159_treated_cefsulodin60_20min	GEO	affymetrix	Aerobic	0.976379	-8.44793e-12	-4.8059e-11	3
GSE10159_treated_cefsulodin60_10min	GEO	affymetrix	Aerobic	0.322762	18.1392	-4.67462e-11	3
GSE10159_treated_cefsulodin60_10min	GEO	affymetrix	Aerobic	0.933704	1.45352e-11	-2.11065e-12	3
GSE10159_treated_cefsulodin60_10min	GEO	affymetrix	Aerobic	0.979884	-1.40818e-12	-4.64098e-11	2
GSE10159_treated_mecillinam0.3_60min	GEO	affymetrix	Aerobic	0.427765	4.17227	0.0011447	2
GSE10159_treated_mecillinam0.3_60min	GEO	affymetrix	Aerobic	0	0	0	2
GSE10159_treated_mecillinam0.3_60min	GEO	affymetrix	Aerobic	0	0	0	2
GSE10159_treated_cefmec_40min	GEO	affymetrix	Aerobic	0.841157	6.92324e-11	4.47989e-12	3
GSE33147_glyc1_day20_rep1	GEO	affymetrix	Aerobic	0.659144	10.1717	7.51235	1
GSE33147_glyc1_day20_rep2	GEO	affymetrix	Aerobic	0.69576	9.72131	-2.00141e-10	1
GSE33147_glyc1_day20_rep3	GEO	affymetrix	Aerobic	0.988714	-1.12372e-11	-1.40178e-12	1
GSE33147_glyc1_day44_rep1	GEO	affymetrix	Aerobic	0.877594	1.49495	-1.74986e-09	1
GSE33147_glyc1_day44_rep2	GEO	affymetrix	Aerobic	0.572433	11.3147	7.12058e-11	1
GSE33147_glyc1_day44_rep3	GEO	affymetrix	Aerobic	0.358119	18.9623	-1.1237e-11	1
GSE33147_glyc2_day20_rep1	GEO	affymetrix	Aerobic	0.520734	13.4764	-6.98071e-11	1
GSE33147_glyc2_day20_rep2	GEO	affymetrix	Aerobic	0.640665	8.43048	-5.6947e-10	1
GSE33147_glyc2_day20_rep3	GEO	affymetrix	Aerobic	0.921272	-2.90776e-11	-5.74576e-12	1
GSE33147_glyc2_day44_rep1	GEO	affymetrix	Aerobic	0.379459	7.82623	1.06619	1
GSE33147_glyc2_day44_rep2	GEO	affymetrix	Aerobic	0.912034	-2.7168e-10	-6.89161e-10	1
GSE33147_glyc2_day44_rep3	GEO	affymetrix	Aerobic	0.872172	-3.7023e-10	-5.36491e-10	1
GSE33147_glycA_day20_rep1	GEO	affymetrix	Aerobic	0.549845	-5.93831e-10	6.88613e-10	1
GSE33147_glycA_day20_rep2	GEO	affymetrix	Aerobic	0.531193	7.91953e-10	-2.4523e-09	1
GSE33147_glycA_day20_rep3	GEO	affymetrix	Aerobic	0.529985	-5.85545e-12	-6.43356e-11	1
GSE33147_glycA_day44_rep1	GEO	affymetrix	Aerobic	0.654701	-9.02577e-10	2.31306e-09	1
GSE33147_glycA_day44_rep2	GEO	affymetrix	Aerobic	0.628316	-3.3748e-10	-8.8358e-10	1
GSE33147_glycA_day44_rep3	GEO	affymetrix	Aerobic	0.585301	-1.77475e-09	-4.10987e-09	1
GSE33147_glycB_day20_rep1	GEO	affymetrix	Aerobic	0.468222	-2.97062e-10	-7.0951e-10	1
GSE33147_glycB_day20_rep2	GEO	affymetrix	Aerobic	0.647886	-2.95162e-10	7.66328e-10	1
GSE33147_glycB_day20_rep3	GEO	affymetrix	Aerobic	0.380179	16.0112	-3.83189e-11	3
GSE33147_glycB_day44_rep1	GEO	affymetrix	Aerobic	0.877646	0.823886	-9.16982e-11	1
GSE33147_glycB_day44_rep2	GEO	affymetrix	Aerobic	0.827628	-1.22528e-12	1.98458e-10	1
GSE33147_glycB_day44_rep3	GEO	affymetrix	Aerobic	0.921729	-1.34089e-09	7.12043e-11	1
GSE33147_glycC_day20_rep1	GEO	affymetrix	Aerobic	0.995251	-9.29621e-10	7.25522e-12	1
GSE33147_glycC_day44_rep1	GEO	affymetrix	Aerobic	0.981096	-5.28574e-10	-1.97823e-10	3
GSE33147_glycC_day44_rep2	GEO	affymetrix	Aerobic	0	0	0	2
GSE33147_glycC_day44_rep3	GEO	affymetrix	Aerobic	0.450744	9.0804	6.19564	2
GSE33147_glycD_day20_rep1	GEO	affymetrix	Aerobic	0.514827	-3.14064e-11	-1.00919e-10	1
GSE33147_glycD_day20_rep2	GEO	affymetrix	Aerobic	0.663227	-7.1523e-12	-4.08893e-11	1
GSE33147_glycD_day20_rep3	GEO	affymetrix	Aerobic	0.527342	1.13106e-09	-1.59386e-09	1
GSE33147_glycD_day44_rep1	GEO	affymetrix	Aerobic	0.543785	-1.20423e-09	3.71788	3
GSE33147_glycD_day44_rep2	GEO	affymetrix	Aerobic	0.68964	1.9793e-10	-9.62853e-10	2
GSE33147_glycD_day44_rep3	GEO	affymetrix	Aerobic	0.472494	4.05127	-4.91102e-09	3
GSE33147_glycE_day20_rep1	GEO	affymetrix	Aerobic	0.588218	2.09567e-10	-2.16336e-10	1
GSE33147_glycE_day20_rep2	GEO	affymetrix	Aerobic	0.686504	-4.67218e-10	9.58886e-10	1
GSE33147_glycE_day20_rep3	GEO	affymetrix	Aerobic	0.776209	-3.7e-11	-1.7302e-11	1
GSE33147_glycE_day44_rep1	GEO	affymetrix	Aerobic	0.871396	0.918189	-1.23225e-09	1
GSE33147_glycE_day44_rep2	GEO	affymetrix	Aerobic	0.750845	0.499879	6.01939e-11	1
GSE33147_glycE_day44_rep3	GEO	affymetrix	Aerobic	0.820556	3.1537	1.01746e-11	1
GSE33147_wt_rep2	GEO	affymetrix	Aerobic	0.995019	-2.50526e-11	3.40824e-11	1
GSE33147_wt_rep3	GEO	affymetrix	Aerobic	0.990873	0.536115	4.0106e-11	2
GSE33147_wt_rep4	GEO	affymetrix	Aerobic	0.455092	8.21016	29.7503	1
GSE33147_wt_rep5	GEO	affymetrix	Aerobic	0.411135	18.1059	-1.72446e-10	3
GSE33147_glycC_day20_rep2	GEO	affymetrix	Aerobic	0.982411	-4.18728e-10	-8.74392e-11	3
GSE33147_glycC_day20_rep3	GEO	affymetrix	Aerobic	0.933334	1.15619	-6.1112e-09	3
GSE19879_limThym_15min	GEO	cDNA	Aerobic	0.590127	13.8572	1.74679e-10	3
GSE19879_limThym_30min	GEO	cDNA	Aerobic	0.955435	3.61697e-10	-3.02719e-09	1
GSE19879_limThym_45min	GEO	cDNA	Aerobic	0.89654	-1.18723e-11	-4.24409e-11	1
GSE19879_limThym_60 min	GEO	cDNA	Aerobic	0.26744	20.3122	8.84232	1
GSE19879_limThym_90min	GEO	cDNA	Aerobic	1.00126	2.16225e-10	-5.08314e-10	1
GSE7656_30Â°C NaCl GB	GEO	affymetrix	Aerobic	0.39302	4.09301	3.5683	1
GSE7656_43Â°C	GEO	affymetrix	Aerobic	0.483125	9.50816	6.33417e-11	3
GSE7656_43Â°C NaCl	GEO	affymetrix	Aerobic	0.567988	13.4935	-1.29076e-10	3
GSE7656_43Â°C NaCl GB	GEO	affymetrix	Aerobic	0.491927	5.5966	2.23419	3
GSE7656_30Â°C NaCl	GEO	affymetrix	Aerobic	0.419044	2.61665	1.90065	1
GSE7656_30Â°C NaCl GB	GEO	affymetrix	Aerobic	0.620126	-1.29201e-09	-7.12463e-10	1
GSE7656_43Â°C	GEO	affymetrix	Aerobic	0.464734	14.6659	1.46553e-11	1
GSE7656_43Â°C NaCl	GEO	affymetrix	Aerobic	0.464936	15.7799	6.99107e-10	3
GSE7656_43Â°C NaCl GB	GEO	affymetrix	Aerobic	0.552737	10.2557	8.88085	1
GSE7656_30Â°C	GEO	affymetrix	Aerobic	0.395418	7.20577	7.03925e-10	3
GSE7656_30Â°C NaCl	GEO	affymetrix	Aerobic	0.321	18.1408	2.26732e-09	3
GSE7656_30Â°C NaCl GB	GEO	affymetrix	Aerobic	0.401142	16.3486	-1.98707e-10	3
GSE7656_43Â°C	GEO	affymetrix	Aerobic	0.382782	10.7783	-3.70719e-10	3
GSE7656_43Â°C NaCl	GEO	affymetrix	Aerobic	0.376287	17.5692	-1.10575e-10	1
GSE7656_43Â°C NaCl GB	GEO	affymetrix	Aerobic	0.401392	7.27155	2.41585e-10	3
GSE19879_zeroThym_15min	GEO	cDNA	Aerobic	1.01065	-5.08501e-11	1.20537e-11	3
GSE19879_zeroThym_30min	GEO	cDNA	Aerobic	1.0069	-2.04216e-10	7.37019e-10	3
GSE19879_zeroThym_45min	GEO	cDNA	Aerobic	1.01069	1.48895e-11	-1.72272e-11	1
GSE19879_zeroThym_60min	GEO	cDNA	Aerobic	1.01069	3.1436e-11	-4.85881e-11	1
GSE19879_zeroThym_90min	GEO	cDNA	Aerobic	0.996415	5.6457e-12	3.28428e-11	1
GSE19879_zeroThym_15min	GEO	cDNA	Aerobic	0.566407	9.92589	3.39048	3
GSE19879_zeroThym_45min	GEO	cDNA	Aerobic	0.601506	6.65273	0.00160963	3
GSE19879_zeroThym_60min	GEO	cDNA	Aerobic	0.965007	-1.39648e-10	-1.90714e-10	1
GSE19879_zeroThym_90min	GEO	cDNA	Aerobic	0.926347	4.34957e-11	6.03978e-12	1
GSE19879_zeroThym_30min	GEO	cDNA	Aerobic	0.95211	-2.30746e-11	-2.5781e-11	1
GSE12554_control	GEO	affymetrix	Aerobic	1.00371	-2.01541e-10	1.68348e-11	3
GSE12554_control	GEO	affymetrix	Aerobic	0.961117	-1.71073e-11	-7.8576e-11	2
GSE12554_Generation 50_10% Cranberry	GEO	affymetrix	Aerobic	0.778847	2.78763	-2.17095e-11	1
GSE12554_Generation 50_10% Cranberry	GEO	affymetrix	Aerobic	0.983195	2.94278e-11	-6.8058e-11	3
GSE12554_Generation 50_10% Cranberry	GEO	affymetrix	Aerobic	0.917154	-4.65339e-11	2.29244e-10	3
GSE12554_Generation 160_10%Cranberry	GEO	affymetrix	Aerobic	0.942473	5.12346e-11	-3.83868e-11	3
GSE12554_Generation 160_10%Cranberry	GEO	affymetrix	Aerobic	0.718328	-8.52034e-09	1.83974e-09	3
GSE12554_Generation 160_10%Cranberry	GEO	affymetrix	Aerobic	0.520204	5.68278	1.20655e-10	1
GSE12554_Generation210_10%Cranberry	GEO	affymetrix	Aerobic	0.946294	-5.62622e-12	4.04871e-11	1
GSE12554_Generation210_10%Cranberry	GEO	affymetrix	Aerobic	0.687934	9.62998	4.80407	1
GSE12554_Generation210_10%Cranberry	GEO	affymetrix	Aerobic	0.845167	5.453	6.21528e-12	1
GSE12554_Generation230_10%Cranberry	GEO	affymetrix	Aerobic	0.465901	1.29831	-6.20085e-10	1
GSE12554_Generation230_10%Cranberry	GEO	affymetrix	Aerobic	0.855264	-3.8414e-11	-1.28334e-11	1
GSE12554_Generation230_10%Cranberry	GEO	affymetrix	Aerobic	0.871668	0.0404656	-3.64786e-11	1
GSE30639_17KL	GEO	affymetrix	Aerobic	0.2612	12.8499	4.15613	1
GSE30639_17KL	GEO	affymetrix	Aerobic	0.249797	15.8663	4.81214	2
GSE30639_17KL	GEO	affymetrix	Aerobic	0.270361	17.2776	5.30737	3
GSE30639_17KL	GEO	affymetrix	Aerobic	0.496826	3.50288	0.00132951	3
GSE30639_17KL	GEO	affymetrix	Aerobic	0	2.50848	0	2
GSE30639_17KS	GEO	affymetrix	Aerobic	0.351969	2.03541	0.000941901	3
GSE30639_17KS	GEO	affymetrix	Aerobic	0.301273	1.79021	0.000806267	3
GSE30639_17KS	GEO	affymetrix	Aerobic	0	2.13574	0	3
GSE30639_17KS	GEO	affymetrix	Aerobic	0.482986	2.08717	0.00129243	1
GSE30639_17KS	GEO	affymetrix	Aerobic	0.38037	2.23848	0.00101788	3
GSE30639_17KS	GEO	affymetrix	Aerobic	0.317786	2.00313	0.000850403	3
GSE30639_40KL	GEO	affymetrix	Aerobic	0.537059	8.26805	3.00316	3
GSE30639_40KL	GEO	affymetrix	Aerobic	0	0	0	2
GSE30639_40KL	GEO	affymetrix	Aerobic	0	0	0	2
GSE30639_40KL	GEO	affymetrix	Aerobic	0.368957	9.77383	8.57575	3
GSE30639_40KL	GEO	affymetrix	Aerobic	0	0	0	2
GSE30639_40KS	GEO	affymetrix	Aerobic	0	2.13957	0	3
GSE30639_40KS	GEO	affymetrix	Aerobic	0.453249	2.29471	0.00121316	2
GSE30639_40KS	GEO	affymetrix	Aerobic	0.478814	2.19471	0.0012813	3
GSE30639_40KS	GEO	affymetrix	Aerobic	0.492434	2.47321	0.00131775	3
GSE30639_40KS	GEO	affymetrix	Aerobic	0.488635	2.67044	0.00130763	3
GSE30639_40KS	GEO	affymetrix	Aerobic	0	0	0	2
GSE30639_6.5KL	GEO	affymetrix	Aerobic	0.515019	2.9564	0.0013782	3
GSE30639_6.5KL	GEO	affymetrix	Aerobic	0.501618	2.25135	0.00134233	3
GSE30639_6.5KL	GEO	affymetrix	Aerobic	0.441209	2.13065	0.0011807	3
GSE30639_6.5KL	GEO	affymetrix	Aerobic	0.419236	2.05456	0.00112194	3
GSE30639_6.5KL	GEO	affymetrix	Aerobic	0.356468	2.19722	4.72272	3
GSE30639_6.5KL	GEO	affymetrix	Aerobic	0.382791	2.18007	0.00102435	3
GSE30639_6.5KS	GEO	affymetrix	Aerobic	0.490046	2.00767	0.00131146	3
GSE30639_6.5KS	GEO	affymetrix	Aerobic	0.413287	2.03299	0.00110597	2
GSE30639_6.5KS	GEO	affymetrix	Aerobic	0	0	0	2
GSE30639_6.5KS	GEO	affymetrix	Aerobic	0.21802	1.97003	0.000583534	2
GSE30639_6.5KS	GEO	affymetrix	Aerobic	0	0	0	2
GSE30639_6.5KS	GEO	affymetrix	Aerobic	0	0	0	2
GSE30639_Anc	GEO	affymetrix	Aerobic	1.01037	5.09484e-11	5.8097e-12	2
GSE30639_Anc	GEO	affymetrix	Aerobic	0.925734	0.0263001	-8.02671e-11	3
GSE30639_Anc	GEO	affymetrix	Aerobic	0.991938	1.63164e-13	-2.0579e-11	3
GSE30639_Anc	GEO	affymetrix	Aerobic	0	4.73182	0	2
GSE17420_WT_EXP	GEO	affymetrix	Aerobic	0.720915	6.25301	0.00192917	2
GSE17420_WT_EXP	GEO	affymetrix	Aerobic	0.85121	5.52336e-11	-5.71147e-10	2
GSE17420_rpos_EXP	GEO	affymetrix	Aerobic	0.900119	1.02247e-10	-4.4574e-10	2
GSE17420_rpos_EXP	GEO	affymetrix	Aerobic	0.990857	-1.23361e-10	8.72811e-11	2
GSE17420_rpos_EXP	GEO	affymetrix	Aerobic	1.00959	6.21782e-12	1.44772e-10	2
GSE17420_WT_STAT	GEO	affymetrix	Aerobic	0.721224	9.04425	2.6029e-10	3
GSE17420_WT_STAT	GEO	affymetrix	Aerobic	0	0	0	2
GSE17420_rpoS_STAT	GEO	affymetrix	Aerobic	0.381235	0.235414	-7.28835e-10	2
GSE17420_rpoS_STAT	GEO	affymetrix	Aerobic	0	0	0	2
GSE17420_rpoS_STAT	GEO	affymetrix	Aerobic	0	0	0	2
ref_GSE33147_wt_rep1	GEO	affymetrix	Aerobic	0.692578	6.64459	4.28789	1
GSE11254_glucose	GEO	affymetrix	Aerobic	0	5.26449	0	1
GSE11254_mucus	GEO	affymetrix	Aerobic	0.119481	2.47658	2.26523	2
GSE11254_mucus	GEO	affymetrix	Aerobic	0.201479	2.47399	1.99986e-10	3
GSE11254_EDL933_glucose	GEO	affymetrix	Aerobic	0.586121	0.764652	5.99288e-10	3
GSE11254_EDL933_glucose	GEO	affymetrix	Aerobic	0.656181	2.21575	0.00175594	1
GSE11254_EDL933_mucus	GEO	affymetrix	Aerobic	0.0975436	0.402631	-6.40418e-11	2
GSE11254_EDL933_mucus	GEO	affymetrix	Aerobic	0.736147	1.8976	-1.95705e-09	1
GSE11254_ECOr26_glucose	GEO	affymetrix	Aerobic	0.341045	1.90889	0.000912635	1
GSE11254_ECOr26_glucose	GEO	affymetrix	Aerobic	0.23327	5.80428	0.000624228	1
GSE11254_ECOR26_mucus	GEO	affymetrix	Aerobic	0.131871	1.08294	3.74272e-09	2
GSE11254_ECOR26_mucus	GEO	affymetrix	Aerobic	0.142651	1.03404	-2.64619e-10	2
GSE11254_NISSLE_glucose	GEO	affymetrix	Aerobic	0.407084	1.23344	-1.43559e-10	1
GSE11254_NISSLE_glucose	GEO	affymetrix	Aerobic	0.876522	-3.97593e-11	6.09022e-11	1
GSE11254_NISSLE_mucus	GEO	affymetrix	Aerobic	0.832096	1.55889	2.00462e-10	3
GSE11254_NISSLE_mucus	GEO	affymetrix	Aerobic	0.531638	8.74861	6.78369	1
GSE7656_30Â°C	GEO	affymetrix	Aerobic	0.460251	2.51463	2.1591	3
GSE7656_30Â°C NaCl	GEO	affymetrix	Aerobic	0.433714	10.7771	-1.31112e-10	3
GSE13589_biofilm_inside	GEO	affymetrix	Aerobic	0.91196	0.696664	1.71394e-11	1
GSE13589_biofilm_inside	GEO	affymetrix	Aerobic	0.936247	1.20331	8.02569e-12	1
GSE13589_biofilm_inside	GEO	affymetrix	Aerobic	0.811761	3.97873	1.22924e-11	1
GSE13589_biofilm_outside	GEO	affymetrix	Aerobic	1.01035	-4.43365e-11	2.63649e-11	2
GSE13589_biofilm_outside	GEO	affymetrix	Aerobic	1.01036	3.824e-13	2.5173e-11	3
GSE13589_planktonic_exponential	GEO	affymetrix	Aerobic	0	0	0	2
GSE13589_planktonic_exponential	GEO	affymetrix	Aerobic	0	0	0	2
GSE13589_planktonic_exponential	GEO	affymetrix	Aerobic	0	0	0	2
GSE13589_planktonic_stationairy	GEO	affymetrix	Aerobic	0.141671	3.26884	2.58229	2
GSE13589_planktonic_stationairy	GEO	affymetrix	Aerobic	0.150609	3.70381	2.74916	1
GSE13589_planktonic_stationairy	GEO	affymetrix	Aerobic	0.145337	3.50636	2.29714	3
ref_GSE17420_WT_STAT	GEO	affymetrix	Aerobic	0.218993	1.36215e-09	-4.43519e-10	2
GSE11052_exp	GEO	UNKNOWN	Aerobic	0.081338	0.540746	0.000217661	2
GSE11052_exp	GEO	UNKNOWN	Aerobic	0.123608	0.94808	-7.66165e-10	2
GSE11052_exp_MAJ	GEO	UNKNOWN	Aerobic	0.218394	1.25182	-1.04074e-10	2
GSE11052_exp	GEO	UNKNOWN	Aerobic	0	0	0	2
GSE11052_exp_MAJ	GEO	UNKNOWN	Aerobic	0	0	0	2
GSE11052_exp_MAJ	GEO	UNKNOWN	Aerobic	0.252684	6.10138	-1.15718e-10	2
GSE11052_exp_MAJ	GEO	UNKNOWN	Aerobic	0.263523	4.08115	-1.06964e-10	2
GSE11052_stat_MAJ	GEO	UNKNOWN	Aerobic	0.835128	2.16063	9.10504e-11	3
GSE11052_stat_MAJ	GEO	UNKNOWN	Aerobic	0.255139	2.90141	1.9128e-09	3
GSE11052_stat_MAJ	GEO	UNKNOWN	Aerobic	0.829105	2.94259e-11	1.07327e-10	2
GSE11052_stat_MAJ	GEO	UNKNOWN	Aerobic	0.549358	4.08864	6.21594	1
GSE11052_exp_MAJ	GEO	UNKNOWN	Aerobic	0.178214	2.35944	3.46542e-11	1
GSE11052_stat_MAJ	GEO	UNKNOWN	Aerobic	0.198528	9.52536	1.5331	3
GSE11052_exp	GEO	UNKNOWN	Aerobic	0	0	0	2
GSE13361_ph7_BW	GEO	1Channel	Aerobic	0.356362	5.89255	1.49058	3
GSE13361_ph7_BW	GEO	1Channel	Aerobic	0.266677	3.55281	1.30064e-09	2
GSE13361_ph7_BW_crp	GEO	1Channel	Aerobic	0.18851	2.85749	1.0713	1
GSE13361_ph7_BW_sucA	GEO	1Channel	Aerobic	0.26385	2.87245	0.000706062	1
GSE13361_ph7_BW_sucB	GEO	1Channel	Aerobic	0.227828	1.98482	6.98543e-10	1
GSE13361_ph7_BW_GcvP	GEO	1Channel	Aerobic	0.162821	1.31393	0.000435711	1
GSE13361_ph7_BW_phoP	GEO	1Channel	Aerobic	0.379259	1.30882	-6.71133e-10	1
GSE13361_ph7_BW_phoQ	GEO	1Channel	Aerobic	0.482378	1.37842	-5.95996e-10	1
GSE13361_ph7_BW_phoH	GEO	1Channel	Aerobic	0.182135	2.45804	-1.88978e-11	3
GSE13361_ph7_BW_hdeA	GEO	1Channel	Aerobic	0.121718	1.9894	-4.69214e-11	2
GSE13361_ph7_BW_hdeB	GEO	1Channel	Aerobic	0.151097	0.0687271	2.48298e-09	2
GSE13361_ph7_BW_gadB	GEO	1Channel	Aerobic	0.0949927	1.91323	9.84411e-10	2
GSE13361_ph7_BW_cadB	GEO	1Channel	Aerobic	0.104044	1.56788	0.511083	2
GSE13361_ph7_BW_narX	GEO	1Channel	Aerobic	0.2031	4.74786	-1.266e-09	1
GSE13361_ph7_BW_fis	GEO	1Channel	Aerobic	0.136428	1.423	1.73367e-10	2
GSE13361_ph7_BW_rpoS	GEO	1Channel	Aerobic	0.0829177	0.650389	-7.23738e-10	2
GSE13361_ph7_BW_aceE	GEO	1Channel	Aerobic	0.117802	0.712171	1.1144e-09	2
GSE13361_ph7_BW_hslJ	GEO	1Channel	Aerobic	0.362893	5.26045	-1.45224e-08	1
GSE13361_ph7_BW_ihfB	GEO	1Channel	Aerobic	0.24542	3.88497	1.2054	1
GSE13361_ph7_BW_ycaD	GEO	1Channel	Aerobic	0.173025	1.65819	0.457328	2
GSE13361_ph7_BW_spy	GEO	1Channel	Aerobic	0.224562	2.34145	0.000600929	1
GSE13361_ph7_BW_yjbJ	GEO	1Channel	Aerobic	0.197658	3.6523	2.08979	1
GSE13361_ph7_BW_cadA	GEO	1Channel	Aerobic	0.309784	1.54354	-8.13904e-12	2
GSE13361_ph7_BW_grxA	GEO	1Channel	Aerobic	0.233983	2.01692	1.13985	2
GSE13361_ph7_BW_gadX	GEO	1Channel	Aerobic	0.233713	1.71248	0.000625415	1
GSE13361_ph7_BW_gadW	GEO	1Channel	Aerobic	0.295629	2.93225	2.72874e-10	1
GSE13361_ph7_BW_adiA	GEO	1Channel	Aerobic	0.803072	7.52978	7.31274e-12	1
GSE13361_ph7_BW_trmE	GEO	1Channel	Aerobic	0.161409	1.59884	1.73253e-10	1
ref_GSE13361_ph7_BW	GEO	1Channel	Aerobic	0.229013	9.81798	-1.65313e-09	1
ref_GSE13361_ph5.5_MG	GEO	1Channel	Aerobic	0.376703	7.95237	4.8089	1
GSE13361_ph7_MG_hns	GEO	1Channel	Aerobic	0.1159	1.18992	0.000310121	2
GSE13361_ph5.5_BW_crp	GEO	1Channel	Aerobic	0.358783	6.13445	0.000960103	2
GSE13361_ph5.5_BW_sucA	GEO	1Channel	Aerobic	0.345391	1.50899	6.63798	1
GSE13361_ph5.5_BW_sucB	GEO	1Channel	Aerobic	0.275084	2.37391	2.66153	1
GSE13361_ph5.5_BW_GcvP	GEO	1Channel	Aerobic	0.477141	3.52318	4.60837e-12	1
GSE13361_ph5.5_BW_phoP	GEO	1Channel	Aerobic	0.381305	1.59654	11.2093	1
GSE13361_ph5.5_BW_phoQ	GEO	1Channel	Aerobic	0.478209	14.1147	1.4373	2
GSE13361_ph5.5_BW_phoH	GEO	1Channel	Aerobic	0.300297	1.66606	9.23193	1
GSE13361_ph5.5_BW_hdeA	GEO	1Channel	Aerobic	0.310008	3.28394	10.3974	1
GSE13361_ph5.5_BW_hdeB	GEO	1Channel	Aerobic	0.277382	6.35965	5.00496	1
GSE13361_ph5.5_BW_gadB	GEO	1Channel	Aerobic	0.407359	7.63713	7.10464e-11	1
GSE13361_ph5.5_BW_cadB	GEO	1Channel	Aerobic	0.420093	4.07846	3.38268	1
GSE13361_ph5.5_BW_narX	GEO	1Channel	Aerobic	0.526611	4.52376	-9.51456e-11	1
GSE13361_ph5.5_BW_fis	GEO	1Channel	Aerobic	0.287334	2.53253	5.03918	1
GSE13361_ph5.5_BW_rpoS	GEO	1Channel	Aerobic	0.440322	3.57525e-11	-4.60291e-11	1
GSE13361_ph5.5_BW_aceE	GEO	1Channel	Aerobic	0.482248	-2.74557e-10	-5.85098e-11	1
GSE13361_ph5.5_BW_hslJ	GEO	1Channel	Aerobic	0.347812	6.77013e-09	2.16119e-10	1
GSE13361_ph5.5_BW_ihfB	GEO	1Channel	Aerobic	0.343697	18.022	-5.24926e-09	1
GSE13361_ph5.5_BW_ycaD	GEO	1Channel	Aerobic	0.538996	14.0881	-3.07241e-10	1
GSE13361_ph5.5_BW_spy	GEO	1Channel	Aerobic	0.374204	5.27972	4.17681e-11	1
GSE13361_ph5.5_BW_yjbJ	GEO	1Channel	Aerobic	0.331504	17.5607	2.41049	1
GSE13361_ph5.5_BW_cadA	GEO	1Channel	Aerobic	0.347707	4.28321	3.91211	1
GSE13361_ph5.5_BW_grxA	GEO	1Channel	Aerobic	0.387731	7.50036	-1.03267e-09	3
GSE13361_ph5.5_BW_gadX	GEO	1Channel	Aerobic	0.359171	18.8258	1.56029e-10	3
GSE13361_ph5.5_BW_gadW	GEO	1Channel	Aerobic	0.400825	17.1535	1.63766e-09	2
GSE13361_ph5.5_BW_adiA	GEO	1Channel	Aerobic	0.314657	2.27283	1.55839	1
GSE13361_ph5.5_BW_trmE	GEO	1Channel	Aerobic	0.640711	11.872	2.49893e-10	3
ref_GSE13361_ph5.5_BW	GEO	1Channel	Aerobic	0.213848	3.94068	1.93871	2
GSE13361_ph5.5_MG_hns	GEO	1Channel	Aerobic	0.169358	16.2379	2.17049	3
GSE29440_control_Âµ=0.3/h_time=2h	GEO	affymetrix	Aerobic	0.356238	8.24372	2.65847	1
GSE29440_control_Âµ=0.3/h_time=4h	GEO	affymetrix	Aerobic	0.485148	4.58388	4.51693	1
ref_GSE29440_CG2strain_Âµ=0.6/h_time=0h	GEO	affymetrix	Aerobic	0.268033	6.47837	9.54684	3
GSE17465_t0	GEO	affymetrix	Aerobic	0.306063	2.09815	22.5663	3
GSE17465_t0	GEO	affymetrix	Aerobic	0.446353	3.86994	33.5346	3
GSE17465_t1	GEO	affymetrix	Aerobic	0.392711	5.78925	7.81791e-09	1
GSE17465_t1	GEO	affymetrix	Aerobic	0.977125	-7.95639e-12	3.29652e-13	2
GSE17465_t1	GEO	affymetrix	Aerobic	0.238752	3.50294	2.05293	1
GSE17465_t2	GEO	affymetrix	Aerobic	0.141781	0.208935	1.70064e-10	2
GSE17465_t2	GEO	affymetrix	Aerobic	0.115015	0.91416	-2.60401e-09	1
GSE17465_t2	GEO	affymetrix	Aerobic	0.140894	1.76487	0.147328	3
GSE17465_IrrE_t0	GEO	affymetrix	Aerobic	0.264481	3.74511	3.62738	3
GSE17465_IrrE_t0	GEO	affymetrix	Aerobic	0	0	0	2
GSE17465_IrrE_t0	GEO	affymetrix	Aerobic	0	0	0	2
GSE17465_IrrE_t1	GEO	affymetrix	Aerobic	0	0	0	2
GSE17465_IrrE_t1	GEO	affymetrix	Aerobic	0	0	0	2
GSE17465_IrrE_t1	GEO	affymetrix	Aerobic	0	0	0	2
GSE17465_IrrE_t2	GEO	affymetrix	Aerobic	0.294814	1.44599	-5.60987e-09	1
GSE17465_IrrE_t2	GEO	affymetrix	Aerobic	0.281266	1.2452	-6.68562e-10	1
GSE17465_IrrE_t2	GEO	affymetrix	Aerobic	0.405453	1.41411	-4.92721e-10	1
_GSE14238_Hep_2	GEO	affymetrix	Aerobic	0	0	0	2
_GSE14238_Pen	GEO	affymetrix	Aerobic	0	0	0	2
_GSE14238_Hep_2	GEO	affymetrix	Aerobic	0	0	0	2
_GSE14238_Pen	GEO	affymetrix	Aerobic	0	0	0	2
_GSE14238_Hep_2	GEO	affymetrix	Aerobic	0	0	0	2
_GSE14238_MinMedia	GEO	affymetrix	Aerobic	0	0	0	2
_GSE14238_Pen	GEO	affymetrix	Aerobic	0	0	0	2
_GSE14238_Pen	GEO	affymetrix	Aerobic	0	0	0	2
_GSE14238_MinMedia	GEO	affymetrix	Aerobic	0.176363	1.18641	2.42026	3
_GSE14238_Pen	GEO	affymetrix	Aerobic	0.120331	1.24409	6.18517	2
_GSE14238_Hep_2	GEO	affymetrix	Aerobic	0.122596	1.77781	2.5016	2
_GSE14238_MinMedia	GEO	affymetrix	Aerobic	0	0	0	2
_GSE14238_Hep_2	GEO	affymetrix	Aerobic	0	0	0	2
_GSE14238_MinMedia_5%CO2	GEO	affymetrix	Aerobic	0	0	0	2
_GSE14238_MinMedia_5%CO2	GEO	affymetrix	Aerobic	0	0	0	2
_GSE14238_MinMedia_5%CO2	GEO	affymetrix	Aerobic	0	0	0	2
_GSE14238_MinMedia_5%CO2	GEO	affymetrix	Aerobic	0	0	0	2
GSE21869_PaeR7IR+M+_rep1	GEO	affymetrix	Aerobic	0	0	0	2
GSE21869_PaeR7IR+M+_rep2	GEO	affymetrix	Aerobic	0.716834	6.8576	3.37759e-11	2
GSE21869_PaeR7IR+M+_rep3	GEO	affymetrix	Aerobic	0.232948	5.11184	2.3293	1
GSE21869_PaeR7IR+M-_rep1	GEO	affymetrix	Aerobic	0.734503	3.5119	2.7362e-10	3
GSE21869_PaeR7IR+M-_rep2	GEO	affymetrix	Aerobic	0.4368	2.05926	-8.34054e-11	3
GSE21869_PaeR7IR+M-_rep3	GEO	affymetrix	Aerobic	0.368672	9.4401	6.40988	1
GSE21869_PaeR7IR-M-_rep2	GEO	affymetrix	Aerobic	0.436569	1.21578	3.05568e-10	3
GSE21869_PaeR7IR-M-_rep3	GEO	affymetrix	Aerobic	0.371662	5.603	2.9735e-11	3
GSE21869_PaeR7IR+M+_GEN70_3-11-2_rep1	GEO	affymetrix	Aerobic	0.3822	-1.38456e-09	-4.12681e-10	2
GSE21869_PaeR7IR+M+_GEN70_3-11-2_rep2	GEO	affymetrix	Aerobic	0.381616	2.15942e-09	-5.9174e-09	2
GSE21869_PaeR7IR+M+_GEN70_3-11-4_rep1	GEO	affymetrix	Aerobic	0.212938	1.60789	3.56939e-09	2
GSE21869_PaeR7IR+M+_GEN70_3-11-4_rep2	GEO	affymetrix	Aerobic	0.21004	2.71133	1.36677	2
GSE21869_PaeR7IR+M+_GEN70_3-11-9_rep1	GEO	affymetrix	Aerobic	0	0	0	2
GSE21869_PaeR7IR+M+_GEN70_3-11-9_rep2	GEO	affymetrix	Aerobic	0	0	0	2
GSE21869_PaeR7IR+M+_GEN70_3-11-10_rep1	GEO	affymetrix	Aerobic	0	0	0	2
GSE21869_PaeR7IR+M+_GEN70_3-11-10_rep2	GEO	affymetrix	Aerobic	0	0	0	2
GSE21869_PaeR7IR+M+_GEN500_3-84-2_rep1	GEO	affymetrix	Aerobic	0	0	0	2
GSE21869_PaeR7IR+M+_GEN500_3-84-2_rep2	GEO	affymetrix	Aerobic	0	0	0	2
GSE21869_PaeR7IR+M+_GEN500_3-84-4_rep1	GEO	affymetrix	Aerobic	0.301963	8.50438e-11	-5.11954e-09	2
GSE21869_PaeR7IR+M+_GEN500_3-84-4_rep2	GEO	affymetrix	Aerobic	0	0	0	2
GSE21869_PaeR7IR+M+_GEN500_3-84-4_rep3	GEO	affymetrix	Aerobic	0	0	0	2
GSE21869_PaeR7IR+M+_GEN500_3-84-6_rep1	GEO	affymetrix	Aerobic	0	0	0	2
GSE21869_PaeR7IR+M+_GEN500_3-84-6_rep2	GEO	affymetrix	Aerobic	0	0	0	2
GSE21869_PaeR7IR+M+_GEN500_3-84-10_rep1	GEO	affymetrix	Aerobic	0	0	0	2
GSE21869_PaeR7IR+M+_GEN500_3-84-10_rep2	GEO	affymetrix	Aerobic	0	0	0	2
GSE21869_PaeR7IR+M+_GEN1000_3-172-1_rep1	GEO	affymetrix	Aerobic	0	0	0	2
GSE21869_PaeR7IR+M+_GEN1000_3-172-1_rep2	GEO	affymetrix	Aerobic	0	0	0	2
GSE21869_PaeR7IR+M+_GEN1000_3-172-1_rep3	GEO	affymetrix	Aerobic	0	0	0	2
GSE21869_PaeR7IR+M+_GEN1000_3-172-9_rep1	GEO	affymetrix	Aerobic	0	0	0	2
GSE21869_PaeR7IR+M+_GEN1000_3-172-9_rep2	GEO	affymetrix	Aerobic	0.637409	10.4957	9.98043	2
GSE21869_PaeR7IR+M+_GEN1000_3-172-10_rep1	GEO	affymetrix	Aerobic	0	0	0	2
GSE21869_PaeR7IR+M+_GEN1000_3-172-10_rep2	GEO	affymetrix	Aerobic	0	0	0	2
GSE29440_CG2strain_Âµ=0.6/h_time=2h	GEO	affymetrix	Aerobic	0.66199	-4.00951e-10	-1.19841e-10	1
GSE29440_CG2strain_Âµ=0.6/h_time=4h	GEO	affymetrix	Aerobic	0.930433	1.11485e-11	3.36452e-11	1
GSE29440_CG2strain_Âµ=0.6/h_time=6h	GEO	affymetrix	Aerobic	0.884418	3.66425e-11	-8.33453e-11	1
GSE29440_CG2strain_Âµ=0.3/h_time=2h	GEO	affymetrix	Aerobic	0.612259	6.6408	2.44592e-10	1
GSE29440_CG2strain_Âµ=0.3/h_time=4h	GEO	affymetrix	Aerobic	0.691681	5.80335	-2.49514e-10	1
GSE29440_CG2strain_Âµ=0.3/h_time=6h	GEO	affymetrix	Aerobic	0.570896	12.1783	1.77881e-10	1
ref_GSE29440_CG2strain_Âµ=0.3/h_time=0	GEO	affymetrix	Aerobic	0.368394	3.91292	1.86676	1
GSE17584_WT_+glu	GEO	affymetrix	Aerobic	0.520576	-4.4719e-10	-9.37385e-11	1
GSE17584_WT_+glu	GEO	affymetrix	Aerobic	0.597068	1.25892	-1.24773e-09	2
GSE17584_WT_+glu	GEO	affymetrix	Aerobic	0.642536	1.29852	1.09126e-09	2
GSE17584_WT_-glu	GEO	affymetrix	Aerobic	1.01029	-1.70912e-10	-2.63939e-10	2
GSE17584_WT_-glu	GEO	affymetrix	Aerobic	0.284617	1.81138	0.000761618	2
GSE17584_mt_+glu	GEO	affymetrix	Aerobic	0.593618	0.530603	4.31551e-11	1
GSE17584_mt_+glu	GEO	affymetrix	Aerobic	0.777379	-3.88902e-11	-1.1943e-10	3
GSE17584_mt_+glu	GEO	affymetrix	Aerobic	0.263528	1.11535e-11	1.84936e-11	3
GSE17584_mt_+glu	GEO	affymetrix	Aerobic	0.290417	1.57655e-10	4.89731e-10	2
GSE17584_mt_+glu	GEO	affymetrix	Aerobic	0.314964	1.55595e-10	-5.797e-10	3
GSE17584_mt_-glu	GEO	affymetrix	Aerobic	0.347408	1.16508	3.25085e-10	1
GSE17584_mt_-glu	GEO	affymetrix	Aerobic	0.287269	6.09646e-11	-2.00277e-10	1
GSE17584_mt_-glu	GEO	affymetrix	Aerobic	0.375595	5.93479e-11	-1.93375e-11	1
GSE29440_control_Âµ=0.3/h_time=6h	GEO	affymetrix	Aerobic	0.337509	17.9715	5.93672e-10	1
GSE13698_BW25113_H2O2	GEO	affymetrix	Aerobic	0.638021	3.75338	1.37195	1
GSE13698_BW25113_water_ygiW	GEO	affymetrix	Aerobic	0.623984	-1.19072e-10	2.28037e-10	3
GSE13698_BW25113_water_ychH	GEO	affymetrix	Aerobic	0.831981	-5.43896e-11	3.73046e-11	1
GSE13698_BW25113_H2O2_ygiW	GEO	affymetrix	Aerobic	0.391393	0.977868	-8.84545e-10	1
GSE13698_BW25113_H2O2_ychH	GEO	affymetrix	Aerobic	0.299419	1.23008	-4.9417e-11	2
GSE13698_TG1_pBS(kan)-TOM-Green_pMMB277-IsoILR1-GSHI_cis-DCE	GEO	affymetrix	Aerobic	0.335841	20.0835	-3.55477e-11	1
GSE13698_TG1_pBS(kan)_pMMB277_cis-DCE	GEO	affymetrix	Aerobic	0.515408	15.1828	1.03515e-11	3
GSE13698_TG1_pBS(kan)-TOM-Green_pMMB277-IsoILR1-GSHI	GEO	affymetrix	Aerobic	0.55036	13.9369	8.82365e-11	3
ref_GSE13698_BW25113_water	GEO	affymetrix	Aerobic	0	0	0	2
GSE13698_TG1_pMMB206-TOM-Green_pBS(kan)_cis-DCE_EchA_F108L_I219L_C248I	GEO	affymetrix	Aerobic	0.198945	4.41488	21.0654	3
_GSE7885_rpoS_biofilm	GEO	affymetrix	Aerobic	0.633618	4.87815	2.57152e-11	3
_GSE7885_rpoS_biofilm	GEO	affymetrix	Aerobic	0.495054	1.94678e-10	-9.34552e-12	2
_GSE7885_rpoS_biofilm	GEO	affymetrix	Aerobic	0.56323	3.66633	-1.76156e-09	2
_GSE7885_WT_biofilm	GEO	affymetrix	Aerobic	0.364871	-3.01753e-11	-1.84453e-10	2
_GSE7885_WT_biofilm	GEO	affymetrix	Aerobic	0.869632	2.3145	-4.05534e-11	2
_GSE7885_rpoS_exp	GEO	affymetrix	Aerobic	0	0	0	2
_GSE7885_rpoS_exp	GEO	affymetrix	Aerobic	0.988472	-1.40266e-10	-7.37891e-10	3
_GSE7885_rpoS_exp	GEO	affymetrix	Aerobic	0.546564	5.6222	1.38485	2
_GSE7885_WT_exp	GEO	affymetrix	Aerobic	0.508979	5.06674	0.718573	3
_GSE7885_WT_exp	GEO	affymetrix	Aerobic	0.532704	6.63104	1.68617	2
_GSE7885_WT_exp	GEO	affymetrix	Aerobic	0.506112	5.35908	1.60196	3
_GSE7885_WT_stat	GEO	affymetrix	Aerobic	0.730662	7.64444	5.80502e-11	1
_GSE7885_WT_stat	GEO	affymetrix	Aerobic	0.800409	6.55432	-6.04452e-12	3
_GSE7885_WT_stat	GEO	affymetrix	Aerobic	0.81061	3.93371	4.24591e-11	3
_GSE7885_rpoS_stat	GEO	affymetrix	Aerobic	0	0	0	2
_GSE7885_rpoS_stat	GEO	affymetrix	Aerobic	0	0	0	2
_GSE7885_rpoS_stat	GEO	affymetrix	Aerobic	0.488568	6.76722	2.06963	2
GSE35371_tr_sin_con_8min_rep1	GEO	affymetrix	Aerobic	0.944155	-1.96149e-11	9.09291e-12	3
GSE35371_tr_sin_con_8min_rep2	GEO	affymetrix	Aerobic	1.00981	-6.48429e-11	-2.95956e-11	2
GSE35371_tr_sin_con_8min_rep3	GEO	affymetrix	Aerobic	0.904576	0.31988	0.00242065	2
GSE35371_sham_sin_con_rep2	GEO	affymetrix	Aerobic	1.00487	-9.94373e-13	5.646e-13	2
GSE35371_sham_sin_con_rep3	GEO	affymetrix	Aerobic	0.918942	1.11765	1.20095e-10	3
GSE35371_tr_sin_con_2.5h_rep1	GEO	affymetrix	Aerobic	0.943931	2.82155e-10	-8.29146e-10	3
GSE35371_tr_sin_con_2.5h_rep2	GEO	affymetrix	Aerobic	0.985555	-2.49145e-11	5.51708e-11	2
GSE35371_tr_sin_con_2.5h_rep3	GEO	affymetrix	Aerobic	0.979347	-3.02385e-10	3.56369e-10	2
GSE35371_sham_sin_con_2.5h_rep2	GEO	affymetrix	Aerobic	1.00986	-3.63875e-12	8.56784e-11	2
GSE35371_sham_sin_con_2.5h_rep3	GEO	affymetrix	Aerobic	0.933701	-2.34626e-10	-6.59417e-10	3
GSE35371_tr_sin_con_15h_rep1	GEO	affymetrix	Aerobic	0.944373	-2.35799e-10	-1.94134e-10	2
GSE35371_tr_sin_con_15h_rep2	GEO	affymetrix	Aerobic	1.01041	-6.96677e-11	-3.92524e-10	3
GSE35371_tr_sin_con_15h_rep3	GEO	affymetrix	Aerobic	0.778601	7.45806	-5.75676e-11	3
GSE35371_sham_sin_con_15h_rep2	GEO	affymetrix	Aerobic	0.89052	4.46278	9.64511e-11	3
GSE35371_sham_sin_con_15h_rep3	GEO	affymetrix	Aerobic	1.00288	-1.58691e-10	-7.25494e-11	3
GSE35371_tr_sin_int_2.5h_rep1	GEO	affymetrix	Aerobic	0.830552	3.82383	-4.43312e-12	2
GSE35371_tr_sin_int_2.5h_rep2	GEO	affymetrix	Aerobic	0.889542	6.43715e-12	1.60481e-09	3
GSE35371_tr_sin_int_2.5h_rep3	GEO	affymetrix	Aerobic	0.801538	7.02206	0.00214492	2
GSE35371_sham_sin_int_2.5h_rep2	GEO	affymetrix	Aerobic	0.898761	3.45052e-11	1.91117e-11	2
GSE35371_sham_sin_int_2.5h_rep3	GEO	affymetrix	Aerobic	0.71198	9.22624	0.00190525	2
GSE35371_tr_sin_int_15h_rep1	GEO	affymetrix	Aerobic	1.00851	5.44674e-11	2.06298e-11	3
GSE35371_tr_sin_int_15h_rep2	GEO	affymetrix	Aerobic	0.873791	-6.07251e-10	1.95418e-10	3
GSE35371_tr_sin_int_15h_rep3	GEO	affymetrix	Aerobic	0.981016	-2.07951e-11	-3.73032e-11	2
GSE35371_sham_sin_int_15h_rep2	GEO	affymetrix	Aerobic	0.960545	2.64408e-10	-8.6304e-10	2
GSE35371_sham_sin_int_15h_rep3	GEO	affymetrix	Aerobic	0.977914	-9.4116e-11	6.95815e-10	2
GSE35371_tr_pwl_int_8min_rep1	GEO	affymetrix	Aerobic	0.912724	3.36666	-1.50462e-11	2
GSE35371_tr_pwl_int_8min_rep2	GEO	affymetrix	Aerobic	0.729483	9.97151	-1.22597e-12	3
GSE35371_tr_pwl_int_8min_rep3	GEO	affymetrix	Aerobic	0.945559	2.40676e-10	-7.62808e-12	3
GSE35371_sham_pwl_int_8min_rep2	GEO	affymetrix	Aerobic	0.868791	3.30566	-7.22752e-10	3
GSE35371_sham_pwl_int_8min_rep3	GEO	affymetrix	Aerobic	1.00734	6.16769e-11	-1.01335e-10	2
GSE28412_t1_0.2h-1	GEO	affymetrix	Aerobic	0.434432	15.5465	10.5705	1
GSE28412_t2_0.2h-1	GEO	affymetrix	Aerobic	0.313537	18.6335	13.4259	1
GSE28412_t3_0.2h-1	GEO	affymetrix	Aerobic	0.755608	9.1601	-1.43629e-11	1
GSE35371_tr_pwl_int_2.5h_rep1	GEO	affymetrix	Aerobic	0.990061	2.52419e-11	3.10532e-11	3
GSE35371_tr_pwl_int_2.5h_rep2	GEO	affymetrix	Aerobic	1.01031	3.32933e-11	8.19105e-12	3
GSE35371_tr_pwl_int_2.5h_rep3	GEO	affymetrix	Aerobic	0.98822	1.00229e-11	4.12899e-11	2
GSE35371_sham_pwl_int_2.5h_rep2	GEO	affymetrix	Aerobic	1.00489	1.99903e-10	-4.50153e-11	3
GSE35371_sham_pwl_int_2.5h_rep3	GEO	affymetrix	Aerobic	1.00996	1.59626e-11	1.73719e-11	3
GSE28412_t1_0.3h-1	GEO	affymetrix	Aerobic	0.504955	2.28368	6.3928e-11	1
GSE28412_t2_0.3h-1	GEO	affymetrix	Aerobic	0.52381	13.248	-2.20314e-11	1
GSE28412_t3_0.3h-1	GEO	affymetrix	Aerobic	0.533113	7.60222	4.79928e-10	1
GSE28412_t1_0.4h-1	GEO	affymetrix	Aerobic	0.932872	2.39567e-11	-6.44989e-13	1
GSE28412_t2_0.4h-1	GEO	affymetrix	Aerobic	0.539986	5.77451	3.80781e-10	3
GSE28412_t3_0.4h-1	GEO	affymetrix	Aerobic	0.719062	6.69331	4.50077	3
GSE35371_tr_pwl_int_15h_rep1	GEO	affymetrix	Aerobic	0.87341	2.80833	-3.37902e-11	2
GSE35371_tr_pwl_int_15h_rep2	GEO	affymetrix	Aerobic	1.00981	-5.17782e-11	2.2791e-11	2
GSE35371_tr_pwl_int_15h_rep3	GEO	affymetrix	Aerobic	0.941312	6.44296e-12	-6.25505e-11	2
GSE35371_sham_pwl_int_15h_rep2	GEO	affymetrix	Aerobic	0.98834	-2.5108e-11	-3.92624e-11	2
GSE35371_sham_pwl_int_15h_rep3	GEO	affymetrix	Aerobic	0.899772	3.55178	-1.45067e-10	2
ref_GSE28412_t0_0.3h-1	GEO	affymetrix	Aerobic	0.63131	6.29711	4.77717e-09	3
ref_GSE28412_t0_0.4h-1	GEO	affymetrix	Aerobic	0.473742	15.123	-2.47658e-11	3
GSE35371_neg_leftch_rep2	GEO	affymetrix	Aerobic	1.00614	-1.18237e-11	9.82755e-11	2
GSE35371_neg_leftch_rep3	GEO	affymetrix	Aerobic	1.00946	-2.48601e-10	8.17277e-10	2
GSE35371_neg_rightch_rep1	GEO	affymetrix	Aerobic	0.971866	-1.87001e-11	6.0244e-13	2
GSE35371_neg_rightch_rep2	GEO	affymetrix	Aerobic	0.943925	-1.18911e-10	2.48055e-11	3
GSE35371_neg_rightch_rep3	GEO	affymetrix	Aerobic	0.981948	-4.85101e-10	-1.53466e-10	2
GSE35371_control_water_rep1	GEO	affymetrix	Aerobic	0.93601	4.00168e-10	-1.26363e-09	3
GSE35371_control_water_rep2	GEO	affymetrix	Aerobic	0.956284	5.86152e-10	-1.42194e-10	3
GSE35371_control_water_rep3	GEO	affymetrix	Aerobic	0.960085	4.55285e-10	-1.04577e-09	1
GSE35371_control_H2O2_rep1	GEO	affymetrix	Aerobic	0.923	8.54496e-12	-3.70532e-10	3
GSE35371_control_H2O2_rep2	GEO	affymetrix	Aerobic	0.781675	2.0156	5.22524e-10	1
GSE35371_control_H2O2_rep3	GEO	affymetrix	Aerobic	0.60161	11.2778	-4.18721e-11	1
GSE13361_ph5.5_BW	GEO	1Channel	Aerobic	0.207639	1.41832	0.164529	2
GSE13361_ph5.5_BW	GEO	1Channel	Aerobic	0.219084	3.10382	7.53296e-10	2
ref_GSE35371_sham_sin_con_rep1	GEO	affymetrix	Aerobic	0.953103	7.5179e-10	-2.95074e-09	3
ref_GSE35371_sham_sin_con_2.5h_rep1	GEO	affymetrix	Aerobic	0.977565	-1.89385e-11	-7.11345e-11	2
ref_GSE35371_sham_sin_con_15h_rep1	GEO	affymetrix	Aerobic	0.913846	3.55893	7.54935e-12	2
ref_GSE35371_sham_sin_int_2.5h_rep1	GEO	affymetrix	Aerobic	0.994121	-6.23465e-11	-7.63367e-12	3
ref_GSE35371_sham_sin_int_15h_rep1	GEO	affymetrix	Aerobic	0.988513	-1.20853e-11	-5.35329e-11	2
ref_GSE35371_sham_pwl_int_8min_rep1	GEO	affymetrix	Aerobic	1.00798	8.27845e-11	-2.68521e-10	2
ref_GSE35371_sham_pwl_int_2.5h_rep1	GEO	affymetrix	Aerobic	0.975567	7.1671e-11	4.27745e-11	2
ref_GSE35371_sham_pwl_int_15h_rep1	GEO	affymetrix	Aerobic	0.964071	1.23704e-11	-3.45309e-11	3
GSE17526_rpoS_Log	GEO	affymetrix	Aerobic	0.912702	4.4036e-11	-7.87708e-11	3
GSE17526_rpoS_Stat	GEO	affymetrix	Aerobic	0.103444	22.6938	-9.69236e-11	2
GSE17526_rpoS_Stat	GEO	affymetrix	Aerobic	0.637698	2.7528	9.27434e-11	1
GSE17526_rpoS_Stat	GEO	affymetrix	Aerobic	0.265005	18.1324	-1.4827e-10	1
GSE17526_rpoS_Log	GEO	affymetrix	Aerobic	0.914801	4.33299e-10	-2.356e-10	3
GSE17526_rpoS_Log	GEO	affymetrix	Aerobic	0.26926	4.49785	22.9811	3
GSE17526_Log	GEO	affymetrix	Aerobic	0.945056	1.33515	4.57754e-09	3
GSE17526_Log	GEO	affymetrix	Aerobic	0.733306	7.13992	1.67379e-10	1
GSE17526_Stat	GEO	affymetrix	Aerobic	0.151173	6.44148	1.30145e-09	2
GSE17526_Stat	GEO	affymetrix	Aerobic	0.0985267	10.0051	2.71389	2
GSE17526_Stat	GEO	affymetrix	Aerobic	0.0801033	5.01971	1.07567e-10	2
GSE17526_rpoS_Log_Ethanol	GEO	affymetrix	Aerobic	0.368243	16.1575	1.94344e-10	1
GSE17526_rpoS_Log_Ethanol	GEO	affymetrix	Aerobic	0.2162	19.9087	1.9851	1
GSE17526_rpoS_Log_Ethanol	GEO	affymetrix	Aerobic	0.194685	5.51293	32.7664	1
GSE17526_rpoS_Stat_Ethanol	GEO	affymetrix	Aerobic	0.0874494	2.94718	2.24998	2
GSE17526_rpoS_Stat_Ethanol	GEO	affymetrix	Aerobic	0.0970943	2.72813	1.87668	2
GSE17526_rpoS_Stat_Ethanol	GEO	affymetrix	Aerobic	0.127072	7.09127	2.01191	2
GSE17526_Log_Ethanol	GEO	affymetrix	Aerobic	0.148854	19.5041	2.32562	2
GSE17526_Log_Ethanol	GEO	affymetrix	Aerobic	0.132608	8.93523	22.6733	2
GSE17526_Log_Ethanol	GEO	affymetrix	Aerobic	0.456401	3.98641	8.7805e-10	3
GSE17526_Stat_Ethanol	GEO	affymetrix	Aerobic	0.224405	2.06459	-2.15534e-10	2
GSE17526_Stat_Ethanol	GEO	affymetrix	Aerobic	0.230114	4.48568	7.95234	2
GSE17526_Stat_Ethanol	GEO	affymetrix	Aerobic	0.238067	2.54279	3.85902	2
GSE20095_WT	GEO	affymetrix	Aerobic	0.959391	-4.83775e-11	2.14985e-11	3
GSE20095_WT	GEO	affymetrix	Aerobic	0.949177	-2.9953e-11	-2.80894e-11	3
GSE20095_rpoS_mt	GEO	affymetrix	Aerobic	0.628041	10.6354	9.57088	2
GSE20095_rpoS_mt	GEO	affymetrix	Aerobic	0.979831	3.19557e-11	-3.91637e-10	1
GSE20095_rpoS_mt	GEO	affymetrix	Aerobic	0.970965	1.20397	1.21098e-10	2
GSE20095_rpoN_mt	GEO	affymetrix	Aerobic	0.748026	5.13432	-5.79626e-11	1
GSE20095_rpoN_mt	GEO	affymetrix	Aerobic	0.65631	9.21742	1.25974e-09	1
GSE20095_rpoN_mt	GEO	affymetrix	Aerobic	0.544227	12.2906	3.34311e-11	3
GSE7326_controlpHSG415_0h	GEO	affymetrix	Aerobic	1.01024	-1.97851e-10	7.49348e-10	2
ref_GSE7326_controlpHSG415_1h	GEO	affymetrix	Aerobic	0.469635	3.77047e-11	-6.73311e-11	3
ref_GSE7326_controlpHSG415_1h50m	GEO	affymetrix	Aerobic	0.917037	0.665655	-2.71105e-09	2
ref_GSE7326_controlpHSG415_3h	GEO	affymetrix	Aerobic	0.585486	-1.97602e-11	1.25496e-10	1
[truncated: 370 more rows]

## Sheet: Biomass-succinate-ethanol
Condition	Column1	Column2	Data source	Platform	Oxygen (0 = anaerobic, 1 = aerobic)	Column3	Biomass	Succinate exchange	Ethanol exchange
GSE1121_anaerobic_wt			GEO	affymetrix	0		0.889064	0.499743	1.87286e-11
GSE1121_anaerobic_soxS			GEO	affymetrix	0		0.969773	-9.3395e-12	1.18882e-11
GSE3250_ppsA_acetateShift_15min			GEO	cDNA	1		0.273094	-1.40838e-11	1.89031e-11
GSE3591_anaerobic_fnr_NO3			GEO	cDNA	0		0.354579	4.54263e-10	2.04269
GSE1780_075mMCopper			GEO	cDNA	1		0.362331	2.73685	2.59904e-10
GSE3591_anaerobic_wt			GEO	cDNA	0		0.624164	6.1713e-10	-1.11444e-09
GSE1780_2mMCopper			GEO	cDNA	1		0.105157	6.26442	7.69939e-10
GSE3591_anaerobic_fnr_NO3			GEO	cDNA	0		0.319138	3.77968	5.21531
GSE3437_rpoE_30min			GEO	cDNA	1		0.195675	-5.41725e-12	-7.06528e-12
GSE3437_rpoE_0min			GEO	cDNA	1		0.550083	8.58724e-11	-2.14481e-10
GSE3591_anaerobic_fnr_NO2			GEO	cDNA	0		0.236769	7.91553	1.28654e-11
GSE3591_anaerobic_wt_NO2			GEO	cDNA	0		0	0	0
GSE3591_aerobic_fnr			GEO	cDNA	0		0.442395	4.8797e-10	3.33471
GSE3591_anaerobic_wt_NO3			GEO	cDNA	0		0.65426	4.87851	3.07471e-10
GSE3437_rpoE_5min			GEO	cDNA	1		0.671196	0.812553	-3.08807e-13
GSE3250_ppsA_acetateShift_6h			GEO	cDNA	1		0.0821764	-2.37621e-10	0.311
GSE3591_anaerobic_wt_NO2			GEO	cDNA	0		0.412316	8.6304e-10	0.800541
GSE3591_anaerobic_fnr			GEO	cDNA	0		0	0	0
GSE3250_ppsA_acetateShift_2h			GEO	cDNA	1		0.28947	2.83738e-11	3.64086e-11
GSE3437_rpoE_60min			GEO	cDNA	1		0.2515	-1.07084e-11	6.7977
GSE3437_rpoE_5min			GEO	cDNA	1		0.133782	2.68137e-12	-3.09516e-11
GSE4511_aerobic_pH5.0			GEO	affymetrix	1		0.519252	-5.48908e-10	2.77255e-10
GSE5239_BL21_mu0.46			GEO	affymetrix	1		0.69531	-5.14549e-10	2.789e-10
GSE3591_anaerobic_fnr_NO2			GEO	cDNA	0		0.33348	4.48009	5.34623e-10
GSE3105_fur1_arabinose			GEO	affymetrix	1		0.143471	3.25888	1.90297e-11
GSE3250_ppsA_acetateShift_5h			GEO	cDNA	1		0.154825	-6.78605e-13	1.08053
GSE3250_ppsA_acetateShift_4h			GEO	cDNA	1		0.198245	-1.48804e-10	-2.36471e-09
GSE3591_anaerobic_wt_NO3			GEO	cDNA	0		0.899567	-1.53231e-10	9.06708e-11
GSE4112_dpiADouble_MidLogPhase			GEO	cDNA	1		0.944969	-3.33415e-11	-2.23641e-10
GSE3591_aerobic_fnr			GEO	cDNA	1		0.549228	7.77572	3.42093e-11
GSE3905_suspension_15h			GEO	affymetrix	1		0.253258	-8.04051e-11	-7.28754e-11
GSE3437_rpoE_15min			GEO	cDNA	1		0.861368	-5.97826e-11	-6.00731e-12
GSE3105_wt2_arabinose			GEO	affymetrix	1		0.444701	8.47446	-9.30405e-12
GSE4511_aerobic_pH5.0			GEO	affymetrix	1		0.590283	2.19295e-10	-1.51324e-08
GSE3250_ppsA_acetateShift_6h			GEO	cDNA	1		0.195649	5.39695e-11	3.93038e-09
GSE3250_ppsA_acetateShift_5h			GEO	cDNA	1		0.133877	-5.73048e-11	9.73975e-09
GSE3250_ppsA_acetateShift_5h			GEO	cDNA	1		0.133807	-1.36261e-11	-1.44077e-11
GSE3250_wt_acetateShift_5min			GEO	cDNA	1		0.186835	4.30201e-11	-7.16016e-11
GSE3591_anaerobic_narXLP_NO2			GEO	cDNA	0		0.395985	3.56775	5.89899e-11
E-MEXP-222_Zn_1			ArrayExpress	cDNA	1		0.0753963	3.08948	-2.63034e-10
GSE3437_rpoE_10min			GEO	cDNA	1		0.199451	8.22408	4.25273e-12
GSE3437_rpoE_2.5min			GEO	cDNA	1		0.355781	1.52151	-2.48527e-12
GSE3437_rpoE_60min			GEO	cDNA	1		0.191666	1.4559e-11	-2.8409e-12
GSE3105_wt2_arabinose_FeSO4			GEO	affymetrix	1		0.0674244	-1.09605e-11	1.28041e-11
GSE4706_500hours			GEO	cDNA	1		0.340494	2.12862	6.22282e-09
GSE3250_ppsA_acetateShift_1h			GEO	cDNA	1		0.184698	-2.77173e-11	-8.71104e-11
E-MEXP-267_hda			ArrayExpress	cDNA	1		0	0	0
GSE4511_aerobic_pH5.0			GEO	affymetrix	1		0.742538	5.59914e-10	0.00808972
GSE3250_ppsA_acetateShift_4h			GEO	cDNA	1		0.558179	4.75904e-11	-9.9101e-11
GSE3250_ppsA_acetateShift_3h			GEO	cDNA	1		0.292355	1.13698e-10	1.01419e-10
GSE5239_BL21_mu0.46			GEO	affymetrix	1		0.60357	-2.05764e-10	0.710146
GSE3591_anaerobic_wt			GEO	cDNA	0		0.523092	7.67411	5.19526e-11
GSE2129_anaeroob_GSNO			GEO	cDNA	0		0.691051	4.74731	8.1024e-11
GSE3591_aerobic_fnr			GEO	cDNA	1		0	0	0
GSE3250_wt_acetateShift_3h			GEO	cDNA	1		0.338321	3.77944e-11	3.63633
GSE3905_suspension_4h			GEO	affymetrix	1		0.830572	2.95346e-11	-2.44999e-11
GSE3250_ppsA_acetateShift_4h			GEO	cDNA	1		0.230652	-1.05001e-10	-9.10736e-10
GSE3250_ppsA_acetateShift_4h			GEO	cDNA	1		0.110193	-3.15745e-11	1.16327e-10
GSE3250_wt_acetateShift_6h			GEO	cDNA	1		0.675793	2.75011	-1.05505e-10
GSE3591_anaerobic_narXL_NO2			GEO	cDNA	0		0.405204	3.57304e-12	3.33926e-11
GSE3250_wt_acetateShift_5min			GEO	cDNA	1		0.152838	-1.37063e-10	-3.64941e-10
GSE4321_rpoH_5min			GEO	cDNA	1		0.449295	-2.46335e-12	3.8902e-11
GSE4511_aerobic_pH5.0			GEO	affymetrix	1		0.366038	-2.3445e-10	5.47047
GSE3591_anaerobic_fnr_NO3			GEO	cDNA	0		0.279444	8.53067	2.31188e-10
GSE3250_ppsA_acetateShift_1h			GEO	cDNA	1		0.182995	7.7832e-11	4.03311e-09
GSE3250_wt_acetateShift_6h			GEO	cDNA	1		0.340017	7.51227	-3.35231e-11
GSE5239_BL21pOri2_mu0.29			GEO	affymetrix	1		0.76404	3.59382	3.72617e-11
GSE3105_wt1_arabinose_FeSO4			GEO	affymetrix	1		0.316357	2.24991	-7.88403e-11
GSE3250_ppsA_acetateShift_3h			GEO	cDNA	1		0.223182	8.60243e-11	5.79081e-11
GSE4706_40hours			GEO	cDNA	1		0.151882	7.93845	4.32755
GSE533_temperatureEvolved_line3			GEO	p33	1		0.297721	0.854422	3.84713
GSE3250_wt_acetateShift_3h			GEO	cDNA	1		0.406091	4.2577	9.92914e-12
GSE3437_rpoE_5min			GEO	cDNA	1		0.26661	-3.24202e-13	-8.94181e-12
GSE3250_ppsA_acetateShift_4h			GEO	cDNA	1		0.117724	-9.19971e-12	-5.36197e-11
GSE3250_wt_acetateShift_2h			GEO	cDNA	1		0.475502	0.868032	4.98189e-10
GSE3591_anaerobic_fnr			GEO	cDNA	0		0.44488	6.47503e-10	0.615951
GSE4321_rpoH_5min			GEO	cDNA	1		0.656152	6.09662e-11	-1.86537e-10
GSE4321_rpoH_2.5min			GEO	cDNA	1		1.00419	1.05118e-11	-5.96602e-12
GSE3250_wt_acetateShift_3h			GEO	cDNA	1		0.334891	7.16049	3.27509e-11
GSE2928_dam_mutS			GEO	affymetrix	1		0.903137	-3.18952e-11	-4.90341e-11
GSE3250_wt_acetateShift_6h			GEO	cDNA	1		0.109682	4.43917e-12	3.89161
GSE533_temperatureEvolved_line3			GEO	p33	1		0.0739956	-1.50381e-10	-2.91831e-09
E-MEXP-245_qor			ArrayExpress	cDNA	1		0.269835	9.16682	6.1701e-11
GSE1121_anaerobic_soxS			GEO	affymetrix	0		0.956275	-1.2733e-11	-6.56567e-12
GSE4321_rpoH_10min			GEO	cDNA	1		0.755418	2.00225e-11	2.00049e-11
GSE3250_wt_acetateShift_4h			GEO	cDNA	1		0.259617	2.9751	5.01565
E-MEXP-267_datA			ArrayExpress	cDNA	1		0.195511	2.23683	-1.09378e-11
GSE1121_aerobic_fnr			GEO	affymetrix	1		0.548159	3.18453e-11	-6.12845e-11
GSE3250_wt_acetateShift_2h			GEO	cDNA	1		0.275226	4.16693	2.28921e-10
GSE3250_wt_acetateShift_15min			GEO	cDNA	1		0.0539888	-5.56511e-11	1.65363
GSE3250_wt_acetateShift_30min			GEO	cDNA	1		0.0553963	0.99937	-2.00102e-09
GSE1121_aerobic_arcAfnr			GEO	affymetrix	1		0.285015	1.66615e-11	2.47194
GSE3250_wt_acetateShift_1h			GEO	cDNA	1		0.269183	2.73472	3.26897
GSE4941_IAA			GEO	p33	1		0	0	0
GSE3250_ppsA_acetateShift_2h			GEO	cDNA	1		0.118006	-6.79686e-10	-2.86845e-12
GSE1121_anaerobic_appY			GEO	affymetrix	0		0.955647	1.13353e-12	-6.55661e-12
GSE3250_ppsA_acetateShift_6h			GEO	cDNA	1		0.111839	3.15635	-4.54444e-10
GSE2037_ala			GEO	affymetrix	1		0.171183	5.19621	1.32784e-10
GSE2037_gly			GEO	affymetrix	1		0.381213	-3.02287e-10	-9.36737e-10
GSE4321_rpoH_20min			GEO	cDNA	1		0.585104	-1.58916e-10	-2.28434e-10
GSE3250_wt_acetateShift_5h			GEO	cDNA	1		0.219606	-6.63925e-11	-6.6886e-10
E-MEXP-267_wt			ArrayExpress	cDNA	1		0.447228	2.30705e-11	3.24976e-12
GSE1121_aerobic_soxS			GEO	affymetrix	1		1.00088	1.4328e-12	-1.1964e-12
GSE3250_wt_acetateShift_30min			GEO	cDNA	1		0.0458921	1.10014e-11	-1.4193e-11
GSE3250_wt_acetateShift_4h			GEO	cDNA	1		0.713851	-1.24715e-11	-3.15078e-11
GSE3250_wt_acetateShift_15min			GEO	cDNA	1		0.0624742	0.148123	0.418477
GSE4321_rpoH_5min			GEO	cDNA	1		0.520486	-5.91526e-11	0.768656
GSE3250_wt_acetateShift_15min			GEO	cDNA	1		0.0554312	4.8101e-11	8.73616e-10
GSE1121_anaerobic_arcAfnr			GEO	affymetrix	0		0.84126	5.37981e-13	-5.05253e-12
GSE1121_aerobic_arcA			GEO	affymetrix	1		0.703186	2.87331e-11	1.33981e-11
GSE3250_wt_acetateShift_1h			GEO	cDNA	1		0.264016	5.01057	-7.79274e-11
GSE3250_wt_acetateShift_1h			GEO	cDNA	1		0.318292	2.35781	-1.16531e-09
E-MEXP-267_datA			ArrayExpress	cDNA	1		0.228189	13.2461	3.42272e-12
GSE1421			GEO	cDNA	1		0	0	0
GSE3250_wt_acetateShift_1h			GEO	cDNA	1		0.268538	-3.00208e-12	-3.11426e-12
GSE2037_glu			GEO	affymetrix	1		0.1826	12.9794	-6.3588e-12
GSE3250_ppsA_acetateShift_1h			GEO	cDNA	1		0	0	0
E-MEXP-222_Zn_1			ArrayExpress	cDNA	1		0.294884	2.8804	-1.63406e-11
E-MEXP-245_qor			ArrayExpress	cDNA	1		0.606986	-3.23641e-11	5.13596
GSE1121_anaerobic_soxS			GEO	affymetrix	0		0.828293	-3.00792e-12	-3.18021e-12
GSE1121_aerobic_soxS			GEO	affymetrix	1		0.960877	-9.20511e-13	6.66592e-12
GSE4321_rpoH_2.5min			GEO	cDNA	1		0.814117	3.7648e-11	1.04062e-11
GSE3250_wt_acetateShift_4h			GEO	cDNA	1		0.254206	2.81195	1.50634e-11
GSE2095_aeroob_GSNO			GEO	cDNA	1		0.858308	2.43735e-12	-1.65659e-11
GSE3250_wt_acetateShift_4h			GEO	cDNA	1		0	0	0
GSE2129_anaeroob_GSNO			GEO	cDNA	0		0.497176	2.163e-11	1.05628e-10
GSE2095_aeroob_GSNO			GEO	cDNA	1		0.524361	-8.64827e-11	1.63853e-10
E-MEXP-244_HOCl			ArrayExpress	cDNA	1		0.334708	8.38981e-12	-4.54486e-11
E-MEXP-245_qor			ArrayExpress	cDNA	1		0.25474	4.0695	1.14791e-10
GSE1121_anaerobic_oxyR			GEO	affymetrix	0		0.835204	-2.72432e-12	1.4045e-11
GSE2037_proline			GEO	affymetrix	1		0.0903303	3.29912	2.53418e-11
GSE5239_BL21pOri1_mu0.39			GEO	affymetrix	1		1.00499	-2.85921e-10	8.66255e-11
GSE3250_wt_acetateShift_1h			GEO	cDNA	1		0.123408	-2.46006e-12	1.05125e-11
GSE3591_anaerobic_fnr_NO2			GEO	cDNA	0		0.169523	4.08506	-2.04659e-10
GSE4112_dpiADouble_MidLogPhase			GEO	cDNA	1		0.0943654	13.1556	-3.33387e-11
GSE1121_anaerobic_fnr			GEO	affymetrix	0		0.952629	-5.90635e-11	1.463e-10
GSE5239_BL21pOri1_mu0.39			GEO	affymetrix	1		0.987726	-4.97608e-10	-1.69564e-10
GSE3591_anaerobic_narXLP_NO2			GEO	cDNA	0		0.220471	4.90331	4.97861e-09
GSE3591_anaerobic_narXL_NO2			GEO	cDNA	0		0.267266	3.91797e-10	1.14054e-09
GSE3250_wt_acetateShift_3h			GEO	cDNA	1		0.860741	5.15872e-12	-3.56149e-12
GSE3437_rpoE_0min			GEO	cDNA	1		0.64931	-3.16981e-11	-5.72139e-12
GSE4321_rpoH_0min			GEO	cDNA	1		0.427461	-6.39026e-11	9.8032
GSE1121_anaerobic_wt			GEO	affymetrix	0		0.95037	2.19836e-11	-1.53946e-11
GSE3105_wt2_arabinose_FeSO4			GEO	affymetrix	1		0.0979056	12.9162	1.9665e-11
GSE3591_anaerobic_fnr			GEO	cDNA	0		0.386012	6.12241e-11	1.45745
GSE4112_dpiA			GEO	cDNA	1		0.976289	-1.71806e-11	-1.26678e-12
GSE3591_aerobic_fnr			GEO	cDNA	1		0	0	0
GSE3937_jliH_24h			GEO	affymetrix	1		0.38696	6.62298	3.17495e-10
GSE5239_BL21pOri1_mu0.39			GEO	affymetrix	1		0.598484	-3.18838e-10	-9.12986e-10
E-MEXP-245_qor			ArrayExpress	cDNA	1		0.668664	1.87077	-2.30414e-11
GSE3591_anaerobic_narXL_NO2			GEO	cDNA	0		0.404428	2.10437	0.106648
GSE3591_anaerobic_wt_NO3			GEO	cDNA	0		0.310817	5.02395	2.81955
GSE4511_aerobic_pH7.0			GEO	affymetrix	1		0.217058	-7.16312e-11	2.2264e-11
GSE5239_BL21pOri2_mu0.29			GEO	affymetrix	1		0.94318	0.503822	1.0734e-12
GSE5239_BL21pOri1_mu0.39			GEO	affymetrix	1		0.41656	3.35512e-12	6.83226e-12
GSE3905_biofilm_24h			GEO	affymetrix	1		0.220023	1.06544e-10	5.54667e-11
GSE3105_wt1_arabinose			GEO	affymetrix	1		0.507471	-2.82992e-10	-6.62743e-11
GSE3937_wt_biofilm_24h			GEO	affymetrix	1		0.0738183	4.00901	5.64575e-10
GSE3591_aerobic_wt			GEO	cDNA	0		0.14714	-7.7215e-10	4.14897e-10
GSE3591_anaerobic_fnr			GEO	cDNA	0		0.384666	-9.51488e-11	-1.8115e-10
E-MEXP-267_datA			ArrayExpress	cDNA	1		0.559558	6.88553e-11	4.51973
GSE3105_fur2_arabinose			GEO	affymetrix	1		0.0946705	3.82873	5.40797e-10
GSE4511_aerobic_pH7.0			GEO	affymetrix	1		0.236978	-8.31991e-12	3.09851e-10
GSE3591_aerobic_wt			GEO	cDNA	0		0	0	0
GSE5239_BL21pOri2_mu0.29			GEO	affymetrix	1		0.49086	7.55043e-10	-2.53902e-09
GSE3591_anaerobic_wt_NO3			GEO	cDNA	0		0.270125	2.83904	10.7128
GSE5239_BL21_mu0.20			GEO	affymetrix	1		0.63001	5.06182	-5.03408e-11
E-MEXP-267_seqA			ArrayExpress	cDNA	1		0.527356	6.2498	-3.2045e-10
GSE3591_anaerobic_wt_NO2			GEO	cDNA	0		0.400035	9.45864	1.77337e-10
GSE3591_anaerobic_fnr			GEO	cDNA	0		0.372331	5.9488	-2.0481e-11
GSE3591_anaerobic_wt_NO2			GEO	cDNA	0		0.287855	4.41514	-6.07044e-11
GSE533_temperatureEvolved_line1			GEO	p33	1		0.326947	6.43663e-11	2.85188e-10
GSE1121_aerobic_arcA			GEO	affymetrix	1		0.808574	-1.23489e-11	-2.09581e-11
GSE4511_aerobic_pH8.7			GEO	affymetrix	1		0	0	0
GSE4511_aerobic_pH7.0			GEO	affymetrix	1		0.250794	-9.26882e-12	3.75694e-11
GSE3250_ppsA_acetateShift_30min			GEO	cDNA	1		0.24585	3.93941e-11	-5.46468e-10
GSE3591_aerobic_wt			GEO	cDNA	0		0	0	0
GSE5239_BL21pOri2_mu0.29			GEO	affymetrix	1		0.644686	5.88777	1.45122e-12
GSE5239_BL21_mu0.20			GEO	affymetrix	1		1.01059	1.51038e-11	-2.43301e-11
GSE4706_500hours			GEO	cDNA	1		0.12701	4.15031	1.53719e-09
GSE1780_2mMCopper			GEO	cDNA	1		0.111276	11.8131	2.00911
GSE3437_rpoE_30min			GEO	cDNA	1		0.12429	0.838559	-7.55341e-11
GSE3437_rpoE_5min			GEO	cDNA	1		0.619733	2.52956e-12	-3.66511e-11
GSE533_temperatureEvolved_line1			GEO	p33	1		0.0740721	6.30808e-10	-3.23709e-09
GSE533_ancestor			GEO	p33	1		0.223592	1.00553e-09	1.71051
GSE5239_BL21pOri2_mu0.20			GEO	affymetrix	1		1.0071	1.03778e-10	-1.35261e-10
GSE2037_glu			GEO	affymetrix	1		0.496331	-6.2348e-10	-4.53379e-10
GSE2928_dam			GEO	affymetrix	1		0.640124	-8.10888e-12	-9.94784e-12
GSE3905_suspension_24h			GEO	affymetrix	1		0.252794	4.59565	-3.95564e-12
GSE1121_aerobic_oxyR			GEO	affymetrix	1		0.32899	-1.62487e-11	-1.07637e-10
GSE1121_aerobic_fnr			GEO	affymetrix	1		0.441494	1.06928e-11	-5.09208e-11
GSE4511_aerobic_pH7.0			GEO	affymetrix	1		0.249378	-4.47776e-11	-1.00841e-10
GSE3591_anaerobic_wt_NO2			GEO	cDNA	0		0.912067	7.88762e-10	-2.31242e-10
GSE5239_BL21pOri2_mu0.20			GEO	affymetrix	1		1.00437	4.09513e-10	8.83443e-12
GSE5239_BL21_mu0.20			GEO	affymetrix	1		1.01062	-7.36334e-12	6.99999e-11
GSE3591_anaerobic_wt			GEO	cDNA	0		0.273421	12.1627	-1.51262e-10
E-MEXP-267_hda			ArrayExpress	cDNA	1		0.899528	6.86175e-12	4.68987e-12
GSE4724_P4Xwildtype			GEO	affymetrix	1		0.990474	7.62128e-11	4.49053e-11
GSE3250_ppsA_acetateShift_5h			GEO	cDNA	1		0.159248	-1.68281e-11	1.68221e-10
GSE3250_ppsA_acetateShift_5h			GEO	cDNA	1		0.0469136	-7.34879e-12	1.08511
GSE4321_rpoH_10min			GEO	cDNA	1		0.928632	-8.1489e-12	-8.71868e-12
GSE1780_2mMCopper			GEO	cDNA	1		0.162451	4.7416	4.06649e-11
GSE2037_succ			GEO	affymetrix	1		0.35635	-7.7409e-11	1.4188e-11
GSE3591_anaerobic_fnr_NO2			GEO	cDNA	0		0.732692	3.24641	6.57747e-12
GSE2037_acetate			GEO	affymetrix	1		0.390676	0.135562	2.79737e-11
GSE3591_anaerobic_wt_NO2			GEO	cDNA	0		0.268453	6.78003	3.28323
GSE3591_aerobic_wt			GEO	cDNA	1		0.692663	3.91325	2.50106e-12
GSE2928_mutS			GEO	affymetrix	1		0.833281	-1.30854e-10	1.5027
GSE1121_anaerobic_appY			GEO	affymetrix	0		0.950887	4.09649e-12	4.23818e-12
GSE1121_aerobic_wt			GEO	affymetrix	1		0.938173	3.82935e-11	5.87103e-12
GSE3437_rpoE_15min			GEO	cDNA	1		0.518429	1.28964e-11	-4.90636e-11
GSE3437_rpoE_60min			GEO	cDNA	1		0.358319	-1.34328e-11	1.63781e-11
GSE4511_aerobic_pH7.0			GEO	affymetrix	1		0.197202	3.11099e-10	5.645e-10
GSE3250_ppsA_acetateShift_6h			GEO	cDNA	1		0.147235	1.85971e-10	0.111153
GSE5239_BL21pOri2_mu0.20			GEO	affymetrix	1		0.91937	-2.73441e-10	2.25782e-10
GSE5239_BL21_mu0.20			GEO	affymetrix	1		0.910569	2.68878e-11	-2.5399e-11
GSE4706_40hours			GEO	cDNA	1		0.151298	2.63089	-3.43594e-10
GSE3250_wt_acetateShift_15min			GEO	cDNA	1		0.0791734	5.14983e-11	-1.71877e-10
GSE533_temperatureEvolved_line2			GEO	p33	1		0.173627	2.84807	-4.99008e-11
GSE2928_wt			GEO	affymetrix	1		0.901621	2.87073e-12	-4.85231e-12
GSE1121_anaerobic_arcAfnr			GEO	affymetrix	0		0.92117	7.86286e-12	-1.03729e-11
GSE1121_aerobic_appY			GEO	affymetrix	1		0.957478	-1.53226e-11	-1.02663e-11
GSE4724_P4Xwildtype			GEO	affymetrix	1		0.997317	-4.36496e-10	5.52073e-11
GSE3437_rpoE_20min			GEO	cDNA	1		0.429601	1.70012e-10	3.02678e-10
GSE3250_ppsA_acetateShift_1h			GEO	cDNA	1		0.444318	8.94935e-11	9.28857e-11
GSE3250_ppsA_acetateShift_1h			GEO	cDNA	1		0	0	0
E-MEXP-244_HOCl			ArrayExpress	cDNA	1		0.243152	-1.48807e-11	-5.16042e-11
GSE2928_mutS			GEO	affymetrix	1		0.955936	-2.16277e-11	7.2427e-11
GSE1121_anaerobic_arcA			GEO	affymetrix	0		0.455747	-8.06144e-11	-6.02373e-11
GSE3250_ppsA_acetateShift_5h			GEO	cDNA	1		0.184915	1.78203e-11	7.8101e-10
GSE3591_anaerobic_fnr			GEO	cDNA	0		0.621921	2.0704	1.02385e-11
GSE5239_BL21pOri1_mu0.20			GEO	affymetrix	1		1.01058	2.2405e-10	-4.35855e-11
GSE3250_ppsA_acetateShift_2h			GEO	cDNA	1		0.232047	-2.08363e-12	-7.4473e-10
GSE3591_anaerobic_fnr_NO2			GEO	cDNA	0		0.255207	-1.23621e-10	1.2817e-09
GSE3591_aerobic_wt			GEO	cDNA	1		0.294587	-1.50331e-10	5.73814e-11
GSE4941_IAA			GEO	p33	1		0.113305	-1.55519e-10	4.85082e-11
GSE3591_anaerobic_wt			GEO	cDNA	0		0.298005	6.80018	-1.50197e-10
GSE3250_wt_acetateShift_4h			GEO	cDNA	1		0.394454	6.36211	-1.06765e-12
GSE533_temperatureEvolved_line2			GEO	p33	1		0.229555	-9.45788e-11	0.52373
GSE3591_anaerobic_fnr_NO2			GEO	cDNA	0		0.329363	3.3615e-12	-4.27749e-11
GSE5239_BL21pOri2_mu0.20			GEO	affymetrix	1		0.522192	-6.79099e-10	2.22569e-09
GSE2928_dam_mutS			GEO	affymetrix	1		0.484438	9.32469e-12	4.84461e-12
GSE1121_anaerobic_wt			GEO	affymetrix	0		0.702795	-8.93314e-12	3.38544e-11
GSE1121_aerobic_arcA			GEO	affymetrix	1		0.774286	-5.18025e-11	-1.25908e-12
GSE4724_P4Xwildtype_arg			GEO	affymetrix	1		0.835072	2.80544e-10	-3.02941e-10
GSE4321_rpoH_0min			GEO	cDNA	1		0.38854	0.0747803	3.02414e-11
GSE4112_dpiA			GEO	cDNA	1		1.00878	2.34493e-10	-2.84482e-11
E-MEXP-222_Zn_3			ArrayExpress	cDNA	1		0.0815292	13.8357	-6.6869e-12
GSE1121_anaerobic_oxyR			GEO	affymetrix	0		0.935635	-3.30755e-12	-2.98153e-12
GSE2095_aeroob_GSNO			GEO	cDNA	1		0.455174	4.39573e-10	2.77343e-09
GSE533_temperatureEvolved_line3			GEO	p33	1		0.162507	1.13317e-09	1.31486
GSE3591_anaerobic_fnr_NO3			GEO	cDNA	0		0.298561	11.2583	-1.0195e-10
GSE3250_ppsA_acetateShift_1h			GEO	cDNA	1		0.478714	1.59656	1.7559e-11
GSE4941_IAA			GEO	p33	1		0.568011	5.72528	2.82202e-11
GSE2129_anaeroob_GSNO			GEO	cDNA	0		0.415602	5.73446	6.39701e-10
GSE2095_aeroob_GSNO			GEO	cDNA	1		0.424028	-5.68162e-10	2.55098e-10
GSE2037_glu			GEO	affymetrix	1		0.604656	1.37557	2.86416e-10
GSE5239_BL21pOri1_mu0.20			GEO	affymetrix	1		0.893551	-5.62457e-11	-1.49257e-10
E-MEXP-245_qor			ArrayExpress	cDNA	1		0.437291	2.315e-10	6.15382e-11
GSE1121_aerobic_oxyR			GEO	affymetrix	1		0.35834	-3.3158e-12	-5.77649e-11
GSE1121_aerobic_fnr			GEO	affymetrix	1		0.457048	3.89122e-11	-1.8406e-10
GSE3250_ppsA_acetateShift_3h			GEO	cDNA	1		0.216116	1.01676	2.35828
GSE4941_IAA			GEO	p33	1		0.584977	4.95442	-2.90172e-11
E-MEXP-267_wt			ArrayExpress	cDNA	1		0.788451	-1.35084e-11	4.27804
GSE4724_P4Xwildtype_arg			GEO	affymetrix	1		1.01041	8.38006e-12	4.89733e-11
GSE3437_rpoE_30min			GEO	cDNA	1		0.591046	-6.07103e-11	0.503812
GSE2037_ala			GEO	affymetrix	1		0.159267	8.7927	-9.29811e-11
GSE2037_proline			GEO	affymetrix	1		0.190977	-4.13047e-11	-6.70444e-11
GSE5239_BL21pOri1_mu0.20			GEO	affymetrix	1		0.910441	-4.8755e-11	-4.04466e-10
GSE1121_aerobic_wt			GEO	affymetrix	1		0.679659	4.37406	-1.1092e-10
GSE4941_IAA			GEO	p33	1		0.308011	-2.52498e-11	-1.97913e-10
GSE4321_rpoH_20min			GEO	cDNA	1		0.288149	-4.82069e-14	1.30939e-11
GSE3250_ppsA_acetateShift_3h			GEO	cDNA	1		0.0787922	-4.29236e-11	3.90869e-11
GSE4724_P4Xwildtype_arg			GEO	affymetrix	1		0.545128	7.4622	-2.56087e-12
GSE3250_ppsA_acetateShift_4h			GEO	cDNA	1		0.231651	2.80403	1.07401e-09
GSE3250_ppsA_acetateShift_3h			GEO	cDNA	1		0.237191	1.65926	2.99064
GSE3250_wt_acetateShift_5h			GEO	cDNA	1		0.917358	8.87744e-12	1.97952e-12
GSE5239_BL21pOri1_mu0.20			GEO	affymetrix	1		0.470156	-6.94509e-11	-3.38572e-10
GSE3250_wt_acetateShift_6h			GEO	cDNA	1		0.195791	-4.85055e-10	-4.96302e-10
GSE1121_anaerobic_fnr			GEO	affymetrix	0		0.950942	5.02258e-11	-2.37731e-11
GSE1121_anaerobic_arcA			GEO	affymetrix	0		0.922109	-1.56758e-11	6.93799e-12
GSE3105_wt2_arabinose			GEO	affymetrix	1		0.226654	12.0178	1.1735e-11
GSE4941_IAA			GEO	p33	1		0	0	0
GSE4724_P4XB2mutant_arg			GEO	affymetrix	1		0.370638	7.04013	7.24401e-10
GSE3250_ppsA_acetateShift_2h			GEO	cDNA	1		0.157017	-1.01643e-10	-2.50871e-09
GSE3250_ppsA_acetateShift_3h			GEO	cDNA	1		0.102269	-1.45408e-11	2.38001e-11
GSE3250_wt_acetateShift_2h			GEO	cDNA	1		0.219199	3.46652	-2.41304e-11
GSE3250_ppsA_acetateShift_2h			GEO	cDNA	1		0	0	0
GSE3250_wt_acetateShift_30min			GEO	cDNA	1		0.0607956	0.0876793	2.36051e-11
GSE4321_rpoH_10min			GEO	cDNA	1		0.501777	-2.05955e-11	-1.18088e-09
E-MEXP-267_wt			ArrayExpress	cDNA	1		0.548669	-1.4147e-10	2.33351e-10
GSE1421			GEO	cDNA	1		0.325086	11.7855	-1.57985e-11
GSE1421			GEO	cDNA	1		0	0	0
GSE3250_wt_acetateShift_5h			GEO	cDNA	1		0.388133	-2.86833e-12	3.19563
GSE4321_rpoH_2.5min			GEO	cDNA	1		0.81001	3.22152	-5.65511e-12
GSE3250_wt_acetateShift_5h			GEO	cDNA	1		0.309727	8.36089e-12	-2.38315e-10
GSE3250_wt_acetateShift_2h			GEO	cDNA	1		0.348952	7.24028e-12	5.66976e-12
GSE3905_suspension_7h			GEO	affymetrix	1		0.651143	4.21999e-11	2.72823
GSE4724_P4XB2mutant_arg			GEO	affymetrix	1		0.274398	11.9867	-2.10414e-10
GSE3250_ppsA_acetateShift_15min			GEO	cDNA	1		0.115518	-1.21959e-10	6.29736e-10
GSE3905_biofilm_7h			GEO	affymetrix	1		0.368615	1.24488e-11	1.74894
GSE3250_wt_acetateShift_2h			GEO	cDNA	1		0.168305	3.61587	-6.16373e-12
GSE3250_wt_acetateShift_30min			GEO	cDNA	1		0.0501989	-3.37551e-11	0.633589
GSE4724_P4XB2mutant_arg			GEO	affymetrix	1		0.934898	0.801716	-5.86491e-10
GSE3105_wt1_arabinose_FeSO4			GEO	affymetrix	1		0.352807	-9.75813e-11	1.48906e-10
GSE3105_fur1_arabinose			GEO	affymetrix	1		0.0834314	3.49343	5.76951e-12
GSE4321_rpoH_0min			GEO	cDNA	1		0.591729	7.1982	3.31555e-12
GSE3250_wt_acetateShift_2h			GEO	cDNA	1		0.425806	0.290009	1.89542e-11
E-MEXP-244_HOCl			ArrayExpress	cDNA	1		0.169439	3.70159	5.8133e-12
GSE3250_wt_acetateShift_4h			GEO	cDNA	1		0	0	0
E-MEXP-244_HOCl			ArrayExpress	cDNA	1		0.598759	1.17815e-10	2.48715e-11
GSE3250_wt_acetateShift_3h			GEO	cDNA	1		0.168685	-8.87408e-10	0.816314
E-MEXP-267_hda			ArrayExpress	cDNA	1		0	0	0
GSE2928_dam			GEO	affymetrix	1		0	0	0
GSE3937_yceP_24h			GEO	affymetrix	1		0.359016	4.34548	-3.37369e-09
GSE3250_wt_acetateShift_5min			GEO	cDNA	1		0.0774566	2.00946e-12	0.993628
GSE4321_rpoH_20min			GEO	cDNA	1		0.318997	1.17404e-11	-9.25748e-11
E-MEXP-222_Zn_3			ArrayExpress	cDNA	1		0.166615	4.56356	8.48655
GSE2129_anaeroob_GSNO			GEO	cDNA	0		0.527818	2.89365e-11	2.31624e-10
GSE5239_BL21_mu0.46			GEO	affymetrix	1		0.474312	-4.94244e-10	5.75066
GSE1121_aerobic_arcAfnr			GEO	affymetrix	1		0.417215	-7.71121e-12	7.5435e-12
GSE3591_anaerobic_narXLP_NO2			GEO	cDNA	0		0.366935	9.90038	-9.99221e-12
GSE3250_wt_acetateShift_3h			GEO	cDNA	1		0	0	0
GSE4941_untreated			GEO	p33	1		0.332349	-3.52908e-11	1.24826e-10
E-MEXP-222_Zn_2			ArrayExpress	cDNA	1		0.374715	1.9272	5.18013
GSE3905_biofilm_15h			GEO	affymetrix	1		0.42947	-2.82639e-12	-1.65618e-09
GSE4321_rpoH_10min			GEO	cDNA	1		0.31996	1.12674e-11	5.82794e-12
GSE2037_succ			GEO	affymetrix	1		0.433007	3.56621	-7.23928e-11
E-MEXP-245_qor			ArrayExpress	cDNA	1		0.433142	1.45032e-10	1.87943e-11
GSE1121_aerobic_appY			GEO	affymetrix	1		0.529401	4.33267e-11	1.54118e-10
GSE3105_fur2_arabinose			GEO	affymetrix	1		0.133236	3.32169	-4.59771e-11
GSE3591_anaerobic_wt			GEO	cDNA	0		0.259144	-5.09766e-11	1.77665
GSE533_temperatureEvolved_line1			GEO	p33	1		0.143319	-5.36468e-10	0.900338
GSE3591_aerobic_wt			GEO	cDNA	1		0.240063	11.0528	9.36813e-12
GSE3250_wt_acetateShift_5min			GEO	cDNA	1		0.282637	-2.4942e-11	9.13034e-10
GSE4941_untreated			GEO	p33	1		0.441293	-8.79193e-13	0.465498
E-MEXP-267_seqA			ArrayExpress	cDNA	1		0.298862	1.83135	1.69798e-12
GSE1121_aerobic_arcAfnr			GEO	affymetrix	1		0.316719	1.97392e-11	2.44725e-11
GSE4511_aerobic_pH8.7			GEO	affymetrix	1		0	0	0
GSE4706_500hours			GEO	cDNA	1		0.149229	2.66651e-10	-2.58987e-09
E-MEXP-267_seqA			ArrayExpress	cDNA	1		0.319089	8.41471	5.1358e-11
GSE1121_anaerobic_arcA			GEO	affymetrix	0		0.94322	-1.20641e-11	-2.71284e-12
GSE533_ancestor			GEO	p33	1		0.167924	6.00289e-10	-2.40841e-10
GSE2037_gly			GEO	affymetrix	1		0.109886	10.9591	3.2707e-11
GSE4941_untreated			GEO	p33	1		0.74954	4.3418	-8.46853e-11
GSE2928_dam_mutS			GEO	affymetrix	1		0.19614	3.42966e-11	-1.64716e-10
GSE1121_aerobic_soxS			GEO	affymetrix	1		0.629269	-1.5049e-11	-4.85625e-11
GSE4511_aerobic_pH8.7			GEO	affymetrix	1		0.258345	5.53056e-11	4.82006
GSE1780_0mMCopper			GEO	cDNA	1		0.12478	13.7023	0.699325
GSE1780_0mMCopper			GEO	cDNA	1		0.125822	8.11941	1.06884e-10
GSE2037_glu			GEO	affymetrix	1		0.921945	-1.04029e-10	7.2872e-12
GSE2928_wt			GEO	affymetrix	1		1.00888	2.23123e-11	1.2883e-11
GSE1121_anaerobic_oxyR			GEO	affymetrix	0		0.818093	-2.04954e-11	1.82733e-11
GSE1121_aerobic_oxyR			GEO	affymetrix	1		0.333727	8.70309e-11	7.25724e-11
GSE3437_rpoE_20min			GEO	cDNA	1		0.288298	-7.36068e-12	2.27392
GSE4941_untreated			GEO	p33	1		0.288729	1.60938e-10	-2.79149e-10
GSE3591_anaerobic_narXL_NO2			GEO	cDNA	0		0.386252	3.62791	9.78285e-11
GSE1121_anaerobic_appY			GEO	affymetrix	0		0.944206	1.06064e-11	4.93349e-12
GSE4511_aerobic_pH8.7			GEO	affymetrix	1		0.282206	1.94455e-12	0.683442
GSE533_temperatureEvolved_line2			GEO	p33	1		0.126528	-5.6535e-10	-1.819e-09
GSE4706_40hours			GEO	cDNA	1		0.308912	4.94065e-10	-6.46639e-08
GSE2037_acetate			GEO	affymetrix	1		0.181916	2.50212	-1.56574e-10
GSE2928_dam			GEO	affymetrix	1		0.226	-1.4591e-11	-6.20083e-13
GSE1121_anaerobic_wt			GEO	affymetrix	0		0.743003	-3.59323e-11	1.30107e-11
GSE3250_ppsA_acetateShift_30min			GEO	cDNA	1		0.0894029	-2.74614e-12	-5.83467e-10
GSE4941_untreated			GEO	p33	1		0.21582	-5.59261e-10	-1.69568e-08
GSE3591_anaerobic_fnr_NO3			GEO	cDNA	0		0.333052	3.76242e-10	4.93433
GSE1780_075mMCopper			GEO	cDNA	1		0.144715	13.7257	3.90459e-11
GSE3591_anaerobic_wt			GEO	cDNA	0		0.923224	1.45844e-10	-1.92699e-11
GSE1780_075mMCopper			GEO	cDNA	1		0.525866	7.91079	-1.12172e-12
GSE3591_anaerobic_wt_NO3			GEO	cDNA	0		0.35582	-7.53442e-10	-8.29165e-11
GSE1780_0mMCopper			GEO	cDNA	1		0.234203	12.1325	-1.6745e-10
E-MEXP-222_Zn_2			ArrayExpress	cDNA	1		0.082789	7.48804	-1.03296e-10
GSE1121_anaerobic_fnr			GEO	affymetrix	0		0.916813	-3.20681e-11	-1.42757e-10
GSE1121_anaerobic_arcAfnr			GEO	affymetrix	0		0.876376	-2.81284e-11	7.31275e-12
GSE1121_aerobic_appY			GEO	affymetrix	1		0.789435	2.56895e-11	-1.69265e-11
GSE3437_rpoE_10min			GEO	cDNA	1		0.374713	1.99046e-11	7.61603e-11
GSE3437_rpoE_60min			GEO	cDNA	1		0.293999	6.70212	-1.71786e-11
GSE4511_aerobic_pH8.7			GEO	affymetrix	1		0	0	0
GSE2928_mutS			GEO	affymetrix	1		0.75353	-3.72947e-11	2.70732
GSE3437_rpoE_2.5min			GEO	cDNA	1		0.954975	2.12327e-11	-7.96433e-11
GSE3591_anaerobic_fnr_NO3			GEO	cDNA	0		0.602641	-6.72701e-11	9.20165e-11
GSE3591_aerobic_fnr			GEO	cDNA	0		0.414664	-1.64365e-10	6.01845
GSE3591_anaerobic_wt_NO3			GEO	cDNA	0		0.602825	1.54213	3.94182e-10
GSE3250_ppsA_acetateShift_2h			GEO	cDNA	1		0	0	0
GSE3591_aerobic_fnr			GEO	cDNA	0		0.388303	-1.16938e-09	4.32478
E-MEXP-584_pat1			ArrayExpress	affymetrix	1		0.627958	3.36117	-7.85663e-10
GSE6444_rseA			GEO	cDNA	1		0.175368	-8.58481e-12	7.98159
GSE8540_cysB_GSNO500_5min			GEO	cDNA	1		1.00002	-1.69045e-10	-3.17078e-11
GSE4394_RNaseE_N_rif_1.5min			GEO	cDNA	1		0.478247	8.1912	2.32647e-12
GSE7573_norR_MOPS_DeaNO_5min			GEO	cDNA	1		0.419637	9.29969	-9.96438e-11
GSE9203_isrR			GEO	affymetrix	1		0.161196	-9.43783e-10	0.613011
E-MEXP-732_p5_g21			ArrayExpress	affymetrix	1		0.964574	-3.64181e-11	-2.57294e-12
GSE9_lexA_UV_40			GEO	cDNA	1		0.529693	-1.37118e-10	1.40062e-10
GSE4556_ph8.5			GEO	affymetrix	1		0.308117	1.66335	2.72032
GSE6781_pGIT8_NO2			GEO	cDNA	1		0.372443	9.01977	1.66176e-11
GSE5981_rsd_overexpr_OD0.9			GEO	cDNA	1		0.529461	7.27666	2.20034e-12
GSE4778_t5_ph5.5			GEO	affymetrix	1		0.939044	8.0115e-11	-2.01094e-11
GSE7573_arcA_MOPS_DeaNO_5min			GEO	cDNA	1		0.915066	-4.34126e-12	2.79252e-12
GSE6992_soxR_paraquat_t8			GEO	affymetrix	1		0.186761	2.72189	0.452944
GSE4394_wt_rif_6min			GEO	cDNA	1		0.652338	1.40064	-3.43618e-11
GSE7398_wt_240			GEO	affymetrix	1		0.116413	-1.3695e-10	1.00934
GSE9388_4h			GEO	affymetrix	1		0.467902	8.8082	1.37236e-11
GSE8540_flhDC_GSNO500_5min			GEO	cDNA	1		0.380417	-3.55616e-12	-5.54624e-11
E-MEXP-732_empty			ArrayExpress	affymetrix	1		0.484929	5.45849	-8.2088e-12
GSE7243_wt			GEO	affymetrix	1		0.297681	-3.52648e-11	-2.96624e-11
GSE6425_MG1655_aerobic_8			GEO	affymetrix	1		0.12817	4.44768e-11	1.12045e-10
GSE4778_t10_ph5.5			GEO	affymetrix	1		0.94599	-3.93806e-12	-2.92619e-12
GSE6609_D3_aerobic_lon			GEO	cDNA	1		0.303737	2.91586	2.29168e-10
GSE6425_UTI89_aerobic_19.5			GEO	affymetrix	1		0.096463	-7.94138e-11	3.41128e-11
GSE8540_flhDC_GSNO500_5min			GEO	cDNA	1		0.716639	0.179009	1.00844e-12
GSE4556_ph5.7			GEO	affymetrix	1		0.774318	6.45534e-11	-5.91847e-13
GSE7265_WT_tp15			GEO	cDNA	1		0.325586	9.53272	4.16815e-12
GSE8965_SA_tp4			GEO	cDNA	1		0.301732	6.8974	0.665543
GSE3665_mut2_0g/l_etOH			GEO	affymetrix	1		0.317834	-9.70381e-12	-1.36916e-10
GSE3123_rne_pBADRNE_noIPTG			GEO	cDNA	1		0.361143	8.70353e-11	-6.47273e-11
GSE7265_WT_tp4			GEO	cDNA	1		0.945623	-4.99108e-14	7.99079e-12
E-MEXP-926_urine_83972			ArrayExpress	affymetrix	1		0.337016	5.80139	2.14248
GSE6425_UTI89_aerobic_12			GEO	affymetrix	1		0.114718	1.1175e-10	-2.21489e-11
GSE8540_metJ_GSNO500_5min			GEO	cDNA	1		0.964028	2.54795e-11	-6.66686e-12
GSE8965_FA_tp4			GEO	cDNA	1		0.223439	-5.86491e-12	-1.67065e-11
E-MEXP-1166_MGAdp_glu1000g			ArrayExpress	cDNA	1		0.969278	1.65569e-13	-4.44206e-11
GSE6425_UTI89_anaerobic_2.5			GEO	affymetrix	0		0.498034	-5.58972e-10	-1.46578e-09
E-MEXP-1166_MGAdp_glu1000g			ArrayExpress	cDNA	1		0.756146	-2.65495e-10	9.31226e-11
E-MEXP-953_T20_K12_Stationary_planktonic_F+Lampda+			ArrayExpress	affymetrix	1		0.742706	-1.13433e-10	-5.54129e-12
E-MEXP-953_T48_MG1655+pBR322_Biofilm_biofilm_F_lambda_ilvG_rfb_50_rph_1			ArrayExpress	affymetrix	1		0.247683	1.03027e-09	-5.30077e-10
GSE6712_benzalkonium_chloride			GEO	p33	1		0.281612	-7.36681e-12	-3.09915e-12
GSE11087_wt_ile			GEO	affymetrix	1		1.00984	3.60848e-12	-1.58468e-11
GSE7_10ug/ml_indaa_15min			GEO	cDNA	1		0.167422	7.2787	0.0551417
E-MEXP-953_T10_K12_Exponiential_planktonic_F+Lampda+			ArrayExpress	affymetrix	1		0	0	0
GSE1154_DH5alpha_F_plasmid			GEO	affymetrix	1		0.0639047	-2.75118e-10	-1.67204e-10
GSE6425_UTI89_anaerobic_4			GEO	affymetrix	0		0.129332	-2.50492e-10	-2.23602e-11
GSE7_10ug/ml_indaa_30min			GEO	cDNA	1		0.375914	-7.79422e-11	11.9743
GSE6426_MG1655			GEO	affymetrix	1		0	0	0
GSE3283_Irp_leucine			GEO	cDNA	1		0.405645	9.2616	2.15261e-11
GSE8965_FA_tp2			GEO	cDNA	1		0.431424	-1.29442e-11	-9.28729e-12
E-MEXP-1166_MGStat_prolonged_stat_phase_37d			ArrayExpress	cDNA	1		0.440119	5.28192e-12	-2.19336e-10
GSE9814_wt			GEO	affymetrix	1		1.00976	3.47323e-11	8.03126e-12
GSE7265_WT_tp1			GEO	cDNA	1		1.01069	-5.0745e-11	5.37516e-11
E-MEXP-1166_DHStat_prolonged_stat_phase_37d			ArrayExpress	cDNA	1		0.196682	13.0129	1.7641e-12
E-MEXP-953_T10_MG1655_Exponiential_planktonic_F_lambda_ilvG_rfb_50_rph_1			ArrayExpress	affymetrix	1		0	0	0
GSE6923_BW25113_wt_24_LB			GEO	affymetrix	1		0.952514	5.57814e-12	1.40722e-11
GSE5098_anaeroob_NOC5/7			GEO	cDNA	0		0.261041	-2.18322e-11	-7.90763e-11
GSE4394_rhlB_rif_4.5min			GEO	cDNA	1		0.510878	7.4444	5.40443e-11
GSE7573_argR_MOPS_DeaNO_5min			GEO	cDNA	1		0.68135	-6.9058e-11	1.44194e-10
GSE8540_wt_DPTA_5min			GEO	cDNA	1		1.01024	4.36029e-12	9.14816e-12
GSE4778_t0_ph7.6			GEO	affymetrix	1		0.989629	-1.97523e-11	1.15516e-11
GSE6923_ATCC25404_wt_24_LB			GEO	affymetrix	1		0.808043	2.40767	2.92731e-11
GSE4394_eno_rif_6min			GEO	cDNA	1		0.69454	8.90172e-12	-3.97429e-13
GSE4394_wt_rif_6min			GEO	cDNA	1		0.862817	-1.18726e-11	1.47543e-11
GSE8965_FA_tp3			GEO	cDNA	1		0.182349	-2.70782e-11	4.14456e-12
E-MEXP-584_pat2			ArrayExpress	affymetrix	1		0.604201	3.56233	2.39243e-10
GSE4556_ph7.0			GEO	affymetrix	1		1.01033	1.16681e-10	-3.20454e-11
GSE7265_WT_tp3			GEO	cDNA	1		0.993069	2.00788e-13	-7.06751e-12
GSE7398_fis_240			GEO	affymetrix	1		0.165538	3.88011e-10	2.77168
GSE8540_metJ_GSNO500_5min			GEO	cDNA	1		0.649379	-8.97094e-12	7.21547e-12
GSE4394_RNaseE_N			GEO	cDNA	1		0.181521	-1.37782e-11	5.94705e-11
GSE6992_wt_paraquat_t0			GEO	affymetrix	1		0.885433	-5.33903e-11	-6.58539e-11
GSE8965_SA_tp2			GEO	cDNA	1		0.258473	-4.30525e-10	1.4782
GSE6712_benzalkonium_chloride			GEO	p33	1		0.316747	8.60105	2.9363e-11
E-MEXP-1166_MGAdp_glu1000g			ArrayExpress	cDNA	1		0.475109	-2.5063e-10	-1.27627e-09
E-MEXP-910_MG_kan_tos_N15			ArrayExpress	affymetrix	1		0.714578	3.13892	1.35836e-11
GSE6425_UTI89_aerobic_2.5			GEO	affymetrix	1		0.472333	1.00785e-11	-1.44925e-10
GSE5098_norR_anaeroob_NOC5/7			GEO	cDNA	0		0.277047	7.4882	-4.15605e-11
GSE4394_RNaseE_N_rif_6min			GEO	cDNA	1		0.941724	6.84233e-12	-6.31933e-11
GSE4556_ph8.5			GEO	affymetrix	1		0.404194	-9.40513e-11	2.65039e-10
GSE7398_wt_90			GEO	affymetrix	1		0.189645	-5.23275e-11	2.89649
GSE6444_hfq_rpoEinduced_IPTG			GEO	cDNA	1		0.838946	-3.49611e-12	-1.28551e-11
GSE7265_WT_tp11			GEO	cDNA	1		0.464728	8.05622	-4.29591e-12
GSE3665_mut3_0g/l_etOH			GEO	affymetrix	1		0	0	0
GSE7573_nsrR_hmpA_MOPS_DeaNO_5min			GEO	cDNA	1		0	0	0
GSE4394_rhlB			GEO	cDNA	1		0.812176	0.273605	-9.64146e-11
GSE3123_rne_pNRNE5			GEO	cDNA	1		0.291988	-4.821e-11	-6.01432e-11
GSE6444_hfq			GEO	cDNA	1		0.975792	-1.4583e-11	1.27726e-11
E-MEXP-732_p5			ArrayExpress	affymetrix	1		0.91452	3.36322e-11	-4.26035e-11
GSE6426_UTI89			GEO	affymetrix	1		0	0	0
GSE4394_eno_rif_1.5min			GEO	cDNA	1		0.0926979	-4.9962e-10	-1.51796e-10
GSE8540_wt_GSNO500_5min			GEO	cDNA	1		0.603482	-1.08452e-11	-2.24034e-12
GSE7_30min			GEO	cDNA	1		0.415922	2.30784	1.89244e-10
GSE6444_rpoEinduced_IPTG			GEO	cDNA	1		0.406175	4.60233e-12	1.41865e-11
GSE7_trpA46PR9_tnaA2			GEO	cDNA	1		0.19965	-9.46338e-10	3.0365
GSE9_UV_5			GEO	cDNA	1		0.664745	-2.79349e-11	5.29403e-11
GSE6609_D1_anaerobic			GEO	cDNA	0		0.91839	1.79259e-12	1.49759e-11
E-MEXP-732_p5			ArrayExpress	affymetrix	1		0.951105	-1.69316e-11	-2.51392e-13
GSE4394_pnp_rif_6min			GEO	cDNA	1		0.94358	5.57327e-12	2.38184e-12
GSE4569_1h_UV			GEO	cDNA	1		0.052364	1.12663	-4.60584e-10
GSE8965_FA_tp4			GEO	cDNA	1		0.236968	5.28429e-11	0.753239
GSE8540_met_suppl_GSNO500_5min			GEO	cDNA	1		0.957915	9.89259e-12	5.61726e-13
GSM532_60min			GEO	cDNA	1		0.0566123	10.8343	6.55204e-10
GSE6609_D1_aerobic_lon			GEO	cDNA	1		0.237375	-1.7534e-10	3.89219e-10
GSE7265_WT_tp7			GEO	cDNA	1		0.985812	-6.35961e-12	-6.41981e-13
GSE2140_tet_inducible_sig32_t5			GEO	affymetrix	1		0.10736	3.37222	1.05e-11
GSE8965_FA_tp2			GEO	cDNA	1		0.585624	3.60783e-11	1.87793e-11
GSE7265_WT_tp17			GEO	cDNA	1		0.270335	11.7193	-5.73878e-12
E-MEXP-1166_MGStat_prolonged_stat_phase_37d			ArrayExpress	cDNA	1		0.195953	-1.98708e-10	2.28764e-08
GSE7265_WT_tp7			GEO	cDNA	1		0.451338	9.63309	-1.34294e-12
GSE7_15ug/ml_indaa_5min			GEO	cDNA	1		0.105029	6.14119	-7.0319e-11
GSE9203_isrK			GEO	affymetrix	1		0.272674	3.24975e-11	-2.35753e-11
GSE7265_WT_tp10			GEO	cDNA	1		0.39426	10.5919	4.64523e-12
GSE6444_rseA			GEO	cDNA	1		0.196216	-5.54095e-11	-1.03142e-11
GSE8540_wt_DPTA_5min			GEO	cDNA	1		0.712434	-3.98167e-11	-1.84523e-11
GSE7573_metJ_MOPS_DeaNO_5min			GEO	cDNA	1		0.080958	12.4719	2.55954e-10
E-MEXP-926_urine_biofilm_83972			ArrayExpress	affymetrix	1		0.20484	1.2843	1.55876e-10
GSE7573_wt_MOPS_DeaNO_5min			GEO	cDNA	1		0.993709	-1.71321e-12	-1.28799e-11
GSE4383_ara_KSL2009			GEO	cDNA	1		0.36148	-5.40083e-10	-1.69851e-09
GSE6712_benzalkonium_chloride+50ppm			GEO	p33	1		0.349256	5.74806	6.72352e-10
GSE4778_t10_ph5.5			GEO	affymetrix	1		0.947546	7.47212e-11	-1.72318e-11
GSE6781_pGIT8_NO2			GEO	cDNA	1		0.284095	-6.88356e-11	-3.7061e-10
E-MEXP-1166_DHAdp_glu1000g			ArrayExpress	cDNA	1		0.91349	-1.78209e-11	1.89706e-11
E-MEXP-953_T48_MG1655+pBR322_Biofilm_biofilm_F_lambda_ilvG_rfb_50_rph_1			ArrayExpress	affymetrix	1		1.01056	4.6592e-12	-5.33246e-12
E-MEXP-953_T20_K12_Stationary_planktonic_F+Lampda+			ArrayExpress	affymetrix	1		0	0	0
GSE9388_4.5h			GEO	affymetrix	1		0.35497	10.9066	7.24504e-12
GSE8540_dpp_GSNO100_5min			GEO	cDNA	1		0.92069	1.965e-12	-2.33243e-12
GSE5981_rsd_overexpr_OD0.4			GEO	cDNA	1		0.445543	8.95384	-4.16719e-12
GSE8540_cys_suppl_GSNO500_5min			GEO	cDNA	1		0.275203	-3.19506e-11	-1.76716e-10
GSE3665_mut3_20g/l_etOH			GEO	affymetrix	1		0.40278	4.53309e-11	3.97396e-11
GSE7243_phoU			GEO	affymetrix	1		0	0	0
GSE6425_MG1655_aerobic_12			GEO	affymetrix	1		0.120728	1.42825e-11	4.18483e-11
GSE6444_rseA			GEO	cDNA	1		0.341172	-2.91262e-11	6.9682
GSE8540_nsrR_GSNO500_5min			GEO	cDNA	1		1.01046	-2.26557e-12	4.90015e-12
E-MEXP-926_urine_VR50			ArrayExpress	affymetrix	1		0.953646	-1.16313e-10	8.19899e-12
GSE4394_pnp			GEO	cDNA	1		0.373112	-4.85566e-10	-1.46089e-10
GSE8965_FA_tp1			GEO	cDNA	1		0.135589	5.2921	-9.31079e-11
GSE7265_WT_tp14			GEO	cDNA	1		0.258092	-8.77757e-11	-2.83681e-10
E-MEXP-1001_suspension_stat			ArrayExpress	affymetrix	1		0.376605	-3.56343e-12	-3.54386e-11
GSE6425_UTI89_anaerobic_3			GEO	affymetrix	0		0.314913	-2.30336e-09	1.58468e-09
GSE4394_rhlB			GEO	cDNA	1		0.488746	-3.36522e-11	1.48674e-11
GSE4394_RNaseE_N_rif_1.5min			GEO	cDNA	1		0.844709	-3.09734e-11	-2.4968e-11
GSE7265_WT_tp4			GEO	cDNA	1		0.971671	-1.14947e-11	5.65236e-14
GSE6425_MG1655_anaerobic_3.75			GEO	affymetrix	0		0.103344	1.5941e-11	-5.16595e-11
GSE6712_benzalkonium_chloride			GEO	p33	1		0.295263	7.94593	-2.93365e-10
GSE11087_relA_spoT_ile_starvation			GEO	affymetrix	1		0.142095	-7.18353e-11	1.71333e-10
GSE9_lexA			GEO	cDNA	1		0.749652	1.56654e-10	-2.10854e-10
GSE8965_FA_tp4			GEO	cDNA	1		0.421007	-5.61379e-10	3.29069e-09
GSE7573_wt_MOPS_DeaNO_5min			GEO	cDNA	1		0.918586	-2.43535e-11	1.3307e-13
GSE4569_1h_UV			GEO	cDNA	1		0.0880947	6.12389	6.63683e-10
GSE6426_MG1655			GEO	affymetrix	1		0.602987	6.9965	-6.75585e-11
GSE4394_eno_rif_4.5min			GEO	cDNA	1		0.234628	-2.69737e-11	-1.84209e-10
GSE7265_WT_tp6			GEO	cDNA	1		0.313922	3.01132	1.51779e-11
E-MEXP-584_pat2			ArrayExpress	affymetrix	1		0.773716	9.79423e-12	0.716152
E-MEXP-1177_glucose			ArrayExpress	affymetrix	1		0.782073	-2.60741e-12	-9.39412e-14
GSE7573_iscR_MOPS_DeaNO_5min			GEO	cDNA	1		1.00409	-1.83808e-11	-8.96311e-12
GSE6425_UTI89_anaerobic_6			GEO	affymetrix	0		0.120373	8.48505e-11	1.79431e-10
GSE3665_wt			GEO	affymetrix	1		0.913606	-2.15487e-11	4.2321e-11
GSE4778_t1_ph5.5			GEO	affymetrix	1		0.809028	-2.8583e-10	-8.4966e-09
GSE4394_RNaseE_N			GEO	cDNA	1		0.170926	5.83299e-11	-3.86124e-10
GSE7265_WT_tp16			GEO	cDNA	1		0.418688	9.02179	4.33051e-13
GSE9814_rpoS			GEO	affymetrix	1		0.634489	6.42491	2.53425e-10
GSE7265_WT_tp6			GEO	cDNA	1		0.312133	9.75408	-2.05333e-12
GSE8706_yncC_colony			GEO	affymetrix	1		0.754553	1.80029	3.49796e-11
GSE7573_wt_MOPS_methionine_DeaNO_5min			GEO	cDNA	1		0.985904	-7.73625e-11	-5.29025e-11
GSE4778_t1_ph5.5			GEO	affymetrix	1		0.644144	6.43268e-11	-1.48197e-10
GSE5098_anaeroob_NOC5/7			GEO	cDNA	0		0.285791	4.51515e-11	-3.33133e-09
E-MEXP-732_p5_g21			ArrayExpress	affymetrix	1		1.01054	1.85613e-10	1.42304e-10
GSE8540_wt_DPTA_5min			GEO	cDNA	1		0.542883	7.76849	-6.00869e-12
GSE6923_MG1655_wt_24_M9			GEO	affymetrix	1		0.940583	-3.10776e-12	1.64858e-11
GSE4394_wt_rif_1.5min			GEO	cDNA	1		0.900713	-1.08345e-11	2.16026e-12
GSE3665_mut2_0g/l_etOH			GEO	affymetrix	1		0	0	0
GSE6992_wt_paraquat_t4			GEO	affymetrix	1		0.539238	-1.25597e-11	5.3579e-11
GSE4394_wt_rif_4.5min			GEO	cDNA	1		0.73167	9.75402e-13	8.79005e-12
GSE7398_fis_90			GEO	affymetrix	1		0.343649	8.74584e-11	1.96966
GSE7_trpEA2_trpR2_50ug/ml			GEO	cDNA	1		0.192469	1.62946	8.33404e-11
GSE5177_cueO			GEO	cDNA	1		0.466121	-8.49419e-12	1.58195e-11
GSE8965_SA_tp3			GEO	cDNA	1		0.354512	0.974604	1.36756
GSE6712_benzalkonium_chloride+50ppm			GEO	p33	1		0.258872	6.75809e-12	-8.33439e-12
GSE7265_WT_tp2			GEO	cDNA	1		0.999201	-4.83653e-12	-8.95835e-14
GSE6425_UTI89_aerobic_5			GEO	affymetrix	1		0.154186	1.25027e-10	1.6409e-10
GSE8540_metJ_GSNO500_5min			GEO	cDNA	1		0.97642	9.86924e-12	-6.87677e-13
GSE6712_control			GEO	p33	1		0.442044	5.85251	2.81382e-11
GSE4556_ph8.5			GEO	affymetrix	1		0	0	0
GSE7398_wt_240			GEO	affymetrix	1		0.150748	5.81096e-11	1.16371
GSE9755_1perc_tannine			GEO	affymetrix	1		0.384508	9.41284e-11	-1.8714e-10
GSE5098_norR_anaeroob_NOC5/7			GEO	cDNA	0		0.0421135	4.91772	4.3723
GSE6426_UTI89			GEO	affymetrix	1		0.656943	4.0909e-11	4.08674e-10
GSE7398_fis_240			GEO	affymetrix	1		0.165004	-4.26891e-11	3.98007
GSE7265_WT_tp10			GEO	cDNA	1		0.53391	8.1725	2.15274e-12
GSE7573_nsrR_hmpA_MOPS_DeaNO_5min			GEO	cDNA	1		0.965368	-5.2927e-12	1.04367e-11
E-MEXP-926_urine_VR50			ArrayExpress	affymetrix	1		0.950826	-5.32232e-12	7.37758e-12
GSE8706_wt_biofilm			GEO	affymetrix	1		0.390414	3.66948e-10	-9.7992e-09
GSE6609_D1_anaerobic_lon			GEO	cDNA	0		0.634519	4.4954	-4.15815e-11
GSE8540_wt_GSNO500_5min			GEO	cDNA	1		0.805552	5.06311e-11	-5.54055e-12
GSE6444_hfq			GEO	cDNA	1		0.398458	-7.96975e-11	11.0351
GSE7573_wt_MOPS_DeaNO_5min			GEO	cDNA	1		0.973022	-2.14128e-11	6.98372e-12
E-MEXP-926_MOPS_glucose_83972			ArrayExpress	affymetrix	1		0.170049	8.53227	3.74377e-11
GSE3665_mut1_0g/l_etOH			GEO	affymetrix	1		0.284691	-9.18569e-11	-1.43756e-10
GSE6609_D1_aerobic_lon			GEO	cDNA	1		0.300922	-1.25928e-10	-4.41432e-10
GSE7265_WT_tp13			GEO	cDNA	1		0.553183	7.87818	-4.75865e-12
GSE6444_hfq			GEO	cDNA	1		0.943344	-5.80466e-10	-4.18647e-10
GSE6609_D1_anaerobic_lon			GEO	cDNA	0		0.17628	13.5049	-4.56713e-11
E-MEXP-1001_biofilm			ArrayExpress	affymetrix	1		0.303859	5.79181	1.1678e-11
GSE7439_luxS			GEO	affymetrix	1		0.167618	-7.50136e-11	3.37536e-10
GSE8540_wt_GSNO100_5min			GEO	cDNA	1		1.0018	-3.3828e-10	-8.74385e-11
GSE4394_rhlB_rif_1.5min			GEO	cDNA	1		0.962173	1.46779e-11	2.88757e-11
GSE8965_SA_tp2			GEO	cDNA	1		0.184003	1.35783e-10	8.98305e-10
E-MEXP-1166_DHAdp_glu1000g			ArrayExpress	cDNA	1		0.545727	6.66505	1.45202e-11
GSE4562_yceB_glucose_indole			GEO	affymetrix	1		0.572083	-4.80894e-11	-4.09769e-11
GSE4394_wt_rif_1.5min			GEO	cDNA	1		0.97514	4.16964e-11	-3.95951e-11
GSE6296_HEPES			GEO	cDNA	1		0.40959	9.08638	1.84621e-10
E-MEXP-1166_MGAdp_glu1000g			ArrayExpress	cDNA	1		0.540758	-2.24935e-10	4.40877
E-MEXP-1001_art_mating_F_phenocopy			ArrayExpress	affymetrix	1		0.175783	-2.10853e-11	-3.74802e-11
GSE7265_WT_tp9			GEO	cDNA	1		1.01067	3.94097e-11	-8.70637e-12
GSE7573_MOPS_SeOh_5min			GEO	cDNA	1		0.974886	-1.19624e-12	-9.52808e-12
GSE6992_wt_paraquat_t4			GEO	affymetrix	1		1.01021	-2.00565e-11	6.12444e-12
GSE7573_metJ_MOPS_DeaNO_5min			GEO	cDNA	1		0.432947	2.24693e-10	4.74146e-10
GSE4394_pnp_rif_3min			GEO	cDNA	1		0.933328	-1.24421e-11	6.13169e-12
E-MEXP-720_crl			ArrayExpress	cDNA	1		0.548841	7.87071	3.79739e-10
GSE9388_5.5h			GEO	affymetrix	1		0.95284	-1.71664e-12	-2.47397e-13
GSE6781_pGIT1			GEO	cDNA	1		0.3152	5.30088	1.82656
GSE4394_wt_rif_6min			GEO	cDNA	1		0.806872	6.03046e-12	7.31443e-11
GSE6425_MG1655_anaerobic_2.5			GEO	affymetrix	0		0.21549	-9.41694e-11	1.5226
GSE6781_pGIT1_NO2			GEO	cDNA	1		0.438631	5.94086e-11	10.6654
GSE4394_wt_rif_6min			GEO	cDNA	1		0.571262	-1.66198e-11	-2.04575e-11
GSE6444_rseA			GEO	cDNA	1		0.644202	-1.19345e-11	2.23262e-11
GSE8540_nsrR_GSNO500_5min			GEO	cDNA	1		0.111899	2.26621e-12	1.03715e-11
GSE7573_norR_MOPS_DeaNO_5min			GEO	cDNA	1		0.495628	8.60091	-1.12983e-11
GSE7398_fis_90			GEO	affymetrix	1		0.334538	-1.21683e-09	4.43238
GSE6609_D1_aerobic			GEO	cDNA	1		0.795736	2.71367	-1.20399e-11
GSE4394_pnp_rif_1.5min			GEO	cDNA	1		0.975486	-1.87416e-11	-8.40007e-12
GSE7_15ug/ml_indaa_30min			GEO	cDNA	1		0.117331	2.4037	9.5611e-12
GSE1154_MG1655			GEO	affymetrix	1		0.142515	4.54785	-1.20887e-08
GSE4394_wt_rif_6min			GEO	cDNA	1		0.932888	-1.04974e-10	5.38048e-11
E-MEXP-732_p23_g9			ArrayExpress	affymetrix	1		0.834429	4.7518e-12	-2.52897e-11
E-TABM-103_t3.1			ArrayExpress	affymetrix	1		0.415659	10.2443	4.08314e-11
GSE5177_cueO			GEO	cDNA	1		0.596373	-5.6423e-11	0.677136
GSE5981_rsd_overexpr_OD1.1			GEO	cDNA	1		0.70456	8.57388e-10	-2.10241e-11
GSE11087_relA_ile_starvation			GEO	affymetrix	1		0.403046	5.85187e-11	-4.54342e-11
E-MEXP-584_pat3			ArrayExpress	affymetrix	1		0.43475	2.36302e-11	-3.20525e-11
GSE4394_wt_rif_6min			GEO	cDNA	1		0.84133	-4.10721e-11	-2.62288e-10
GSE7_50ug/mltrp_30min			GEO	cDNA	1		0.530206	1.99202e-10	4.50225e-10
E-MEXP-1166_MGStat_prolonged_stat_phase_37d			ArrayExpress	cDNA	1		0.55044	7.33585e-12	2.40352e-11
GSE8965_FA_tp1			GEO	cDNA	1		0	0	0
GSE8965_SA_tp4			GEO	cDNA	1		0.225713	7.04844e-11	1.72001e-11
GSE4394_pnp			GEO	cDNA	1		0.260299	3.83723e-10	4.47417
GSE4778_t5_ph5.5			GEO	affymetrix	1		0.598561	-1.13682e-10	4.89422
GSE4569_1h_UV			GEO	cDNA	1		0.17407	7.05391	5.7988
GSE7439_luxS_epinephrine			GEO	affymetrix	1		0.936755	2.6333e-12	1.25265e-11
GSE7573_iscR_MOPS_DeaNO_5min			GEO	cDNA	1		0.490279	1.04716e-11	0.888938
GSE5552_indole			GEO	affymetrix	1		0.835076	-2.4769e-11	-3.67988e-11
GSE6992_soxR_paraquat_t2			GEO	affymetrix	1		0.265691	-4.15352e-12	-2.46096e-11
GSE7265_WT_tp16			GEO	cDNA	1		0.312958	11.3245	-7.42006e-12
GSE7265_WT_tp5			GEO	cDNA	1		0.377055	8.6892	-3.81054e-12
E-MEXP-953_T48_MG1655_Biofilm_biofilm_F_lambda_ilvG_rfb_50_rph_1			ArrayExpress	affymetrix	1		0.37302	-1.82145e-10	4.22013
GSE6425_MG1655_aerobic_2.5			GEO	affymetrix	1		0.60112	1.10119e-11	-1.10964e-11
E-MEXP-1166_DHAdp_glu1000g			ArrayExpress	cDNA	1		0.69542	1.71819e-11	-5.38427e-12
GSE7573_wt_MOPS_methionine_DeaNO_5min			GEO	cDNA	1		0.870918	2.26002e-09	-3.44385e-10
GSE6992_wt_paraquat_t8			GEO	affymetrix	1		0.523388	-6.00963e-12	-2.48093e-11
GSE4394_RNaseE_N			GEO	cDNA	1		0.237228	-8.03248e-11	1.97998e-10
E-MEXP-926_MOPS_glucose_83972			ArrayExpress	affymetrix	1		0.140979	9.77259	-7.15475e-11
E-MEXP-926_urine_VR50			ArrayExpress	affymetrix	1		0.94387	4.89689e-12	-9.43849e-12
E-MEXP-720_crl			ArrayExpress	cDNA	1		0.422248	-6.87137e-11	5.46648
GSE6425_UTI89_aerobic_5			GEO	affymetrix	1		0.168709	-4.84549e-12	5.76225e-11
GSE4556_ph5.7			GEO	affymetrix	1		0.688385	7.76143e-12	2.22094e-11
GSE6425_MG1655_anaerobic_6.75			GEO	affymetrix	0		0.126462	2.69273e-11	2.12242e-11
GSE6712_benzalkonium_chloride+50ppm			GEO	p33	1		0.295584	5.32012	-3.68291e-11
GSE4394_RNaseE_N_rif_4.5min			GEO	cDNA	1		0.938382	3.60127e-11	1.72228e-11
E-MEXP-953_T20_MG1655_Stationary_planktonic_F_lambda_ilvG_rfb_50_rph_1			ArrayExpress	affymetrix	1		0.306877	1.44704e-11	-4.2337e-11
GSE9_lexA_UV_5			GEO	cDNA	1		0.708851	3.58287e-10	-1.38898e-10
GSE4383_ara_KSL2000			GEO	cDNA	1		0.248886	2.65969e-09	3.30549e-08
GSE9582_luxS			GEO	affymetrix	1		1.01047	6.71607e-12	7.72196e-12
GSE6712_control			GEO	p33	1		0.58755	-2.74249e-10	2.22531
GSE8965_SA_tp3			GEO	cDNA	1		0.199155	2.48953	1.28441e-12
E-MEXP-926_MOPS_glucose_83972			ArrayExpress	affymetrix	1		0.265194	7.18538	-3.48485e-11
GSE7398_wt_90			GEO	affymetrix	1		0.142225	-1.72187e-10	0.231677
GSE7265_WT_tp2			GEO	cDNA	1		1.01068	-1.86494e-11	2.05355e-11
GSE7398_fis_90			GEO	affymetrix	1		0.21057	-1.74502e-09	3.91349
GSE8540_met_suppl_GSNO500_5min			GEO	cDNA	1		0.960069	-2.25116e-12	-4.39466e-12
GSE9_lexA_UV_10			GEO	cDNA	1		1.01033	-1.91883e-11	-6.65899e-10
GSE6712_benzalkonium_chloride+50ppm			GEO	p33	1		0.439327	-6.24885e-10	-2.34011e-10
GSE4394_eno			GEO	cDNA	1		0.353503	-5.66742e-11	0.635166
GSE9582_luxS			GEO	affymetrix	1		1.0105	-5.01963e-12	1.79921e-13
GSE1154_DH5alpha			GEO	affymetrix	1		0.055981	5.51977e-12	8.48379e-11
GSE4394_eno_rif_1.5min			GEO	cDNA	1		0.272806	-8.37788e-10	4.33506e-10
GSE6923_BW25113_wt_R1drd19_24_LB			GEO	affymetrix	1		0.96912	-2.93583e-11	-5.11756e-11
GSE4778_t0_ph7.6			GEO	affymetrix	1		0.922518	1.22477e-10	2.82586e-11
GSE3665_wt_20g/l_etOH			GEO	affymetrix	1		0.296452	7.42397e-12	2.49711e-11
E-MEXP-1166_DHStat_prolonged_stat_phase_37d			ArrayExpress	cDNA	1		0.472597	8.02894	1.6506e-11
GSE3123_pRNG3			GEO	cDNA	1		0.848052	5.98561e-11	7.52806e-10
GSE7243_phoU			GEO	affymetrix	1		0	0	0
GSE6609_D1_aerobic_lon			GEO	cDNA	1		0.902325	2.46491e-11	-1.10109e-11
E-MEXP-584_urine			ArrayExpress	affymetrix	1		0.333617	8.51309e-11	8.00155e-11
GSE4569_50h_UV			GEO	cDNA	1		0.137758	5.38002	0.154417
GSE6609_D1_anaerobic_lon			GEO	cDNA	0		0.265586	-8.40182e-11	-2.85324e-10
E-MEXP-584_MOPS			ArrayExpress	affymetrix	1		1.0102	-1.55209e-11	-4.92935e-11
GSE6992_wt_paraquat_t6			GEO	affymetrix	1		1.01026	1.94966e-11	-1.92514e-12
GSM570_50ug/mltrp_60min			GEO	cDNA	1		0.0437017	7.82473	1.62641
GSE7265_WT_tp12			GEO	cDNA	1		1.01056	-1.77151e-11	-3.67574e-12
GSE6444_hfq			GEO	cDNA	1		0.97554	1.09467e-11	1.72687e-11
GSE4562_trpE_glucose			GEO	affymetrix	1		0.478981	3.6058e-11	-4.73228e-11
E-TABM-103_t4.6			ArrayExpress	affymetrix	1		0	0	0
GSE6425_MG1655_aerobic_18			GEO	affymetrix	1		0.102387	1.68986e-10	-3.66646e-10
GSE8540_wt_GSNO100_5min			GEO	cDNA	1		0.44814	-7.31762e-12	6.76276e-12
GSE4394_RNaseE_N_rif_3min			GEO	cDNA	1		0.944639	-3.84219e-11	3.00308e-11
GSE8965_SA_tp2			GEO	cDNA	1		0.46259	5.5958	-1.46312e-10
GSE7_50ug/mltrp_60min			GEO	cDNA	1		0.0439191	7.84833	1.72662
E-MEXP-732_p23_g9			ArrayExpress	affymetrix	1		0.909326	6.66511e-11	-9.48519e-12
GSE6195_biofilm_istatin			GEO	affymetrix	1		0	0	0
E-MEXP-732_p5_g21			ArrayExpress	affymetrix	1		0.532731	4.65453	-5.62008e-12
GSE3665_mut2_0g/l_etOH			GEO	affymetrix	1		0.247379	2.77113e-10	-1.03177e-10
GSE6712_benzalkonium_chloride+50ppm			GEO	p33	1		0.0325617	-1.47655e-09	-1.38269e-09
GSE4394_wt_rif_3min			GEO	cDNA	1		0.945602	1.46817e-10	-2.27901e-10
GSE4394_rhlB			GEO	cDNA	1		0.928551	-1.63994e-11	2.2706e-12
GSE7265_WT_tp8			GEO	cDNA	1		0.720791	3.64829e-13	1.83825e-11
GSE8965_SA_tp1			GEO	cDNA	1		0.742955	2.24601e-12	6.51691e-13
E-MEXP-732_p23_g9			ArrayExpress	affymetrix	1		0.959519	-1.49934e-10	-7.83923e-11
E-MEXP-1166_DHAdp_glu1000g			ArrayExpress	cDNA	1		0.952966	1.45948e-10	-3.47746e-11
E-MEXP-584_pat3			ArrayExpress	affymetrix	1		0.381923	2.2904e-11	1.32597e-10
GSE6425_MG1655_anaerobic_3			GEO	affymetrix	0		0.212765	1.11527e-09	3.66211e-10
GSE4394_wt_rif_1.5min			GEO	cDNA	1		0.948933	1.63998e-11	6.17934e-11
GSE4394_RNaseE_N_rif_1.5min			GEO	cDNA	1		0.973576	-3.12937e-12	5.33012e-11
GSE5098_anaeroob_NOC5/7			GEO	cDNA	0		0.681739	1.13866e-11	3.55518e-11
GSE6609_D3_anaerobic_lon			GEO	cDNA	0		0.967761	2.22685e-11	2.34782e-12
GSE6781_pGIT1_NO2			GEO	cDNA	1		0.389636	7.25311e-11	1.87161
GSE6296_HEPES			GEO	cDNA	1		0.666403	4.85267e-10	-8.02064e-10
GSE1154_DH5alpha_F_plasmid			GEO	affymetrix	1		0.0726448	6.68561e-12	-3.41336e-12
GSE9587_luxS			GEO	affymetrix	1		1.00971	-9.85584e-12	8.01508e-12
GSE9_UV_20			GEO	cDNA	1		0.892873	-5.28936e-12	7.452e-13
E-MEXP-1001_biofilm			ArrayExpress	affymetrix	1		0.333056	4.13751	-1.99305e-10
GSE4394_pnp			GEO	cDNA	1		0.240164	-4.89496e-10	0.363132
GSE8540_cysB_GSNO500_5min			GEO	cDNA	1		0.550684	7.92119	1.07289e-10
GSE7573_norR_MOPS_DeaNO_5min			GEO	cDNA	1		0.583702	7.32543	3.95121e-11
GSE6781_pGIT8_NO2			GEO	cDNA	1		0.268313	-7.64166e-12	1.26103
GSE9203_wt			GEO	affymetrix	1		0.601729	1.42139	2.59294e-10
E-MEXP-1166_DHStat_prolonged_stat_phase_37d			ArrayExpress	cDNA	1		0.143984	12.0891	1.37315e-10
GSE5098_norR_anaeroob_NOC5/7			GEO	cDNA	0		0.150219	3.83513	-3.38469e-11
GSE5981_rsd_overexpr_OD0.9			GEO	cDNA	1		0.652265	1.35652e-11	3.40652e-11
GSE7439_luxS_AI3			GEO	affymetrix	1		0.457325	3.83926e-11	-3.59527e-10
GSE4778_t5_ph5.5			GEO	affymetrix	1		0.93981	-1.12537e-12	7.11006e-12
GSE7573_arcA_MOPS_DeaNO_5min			GEO	cDNA	1		0.954869	1.40627e-10	2.52832e-12
GSE10974_hsp60pv98Iinducible			GEO	affymetrix	1		0.621405	-2.61067e-10	7.41066e-09
GSE4394_rhlB_rif_3min			GEO	cDNA	1		0.785901	2.68888	2.15809e-11
GSE8965_SA_tp1			GEO	cDNA	1		0.680823	1.3574e-10	2.39392
GSE8965_SA_tp4			GEO	cDNA	1		0.550782	1.05421e-10	8.35042e-11
GSE6992_soxR_paraquat_t6			GEO	affymetrix	1		0.20506	4.05225	0.584305
GSE9388_3.5h_AI_2			GEO	affymetrix	1		0.503246	8.26865	9.32225e-12
GSE4394_rhlB_rif_6min			GEO	cDNA	1		0.941155	-1.15413e-11	-3.73959e-11
E-MEXP-720_crl			ArrayExpress	cDNA	1		0.417878	1.42484e-10	1.03881
GSE7_5min			GEO	cDNA	1		0.356484	1.48987e-09	7.13012e-10
GSE7573_wt_MOPS_DeaNO_5min			GEO	cDNA	1		1.01056	4.23441e-11	-2.43768e-11
E-MEXP-953_T10_MG1655_Exponiential_planktonic_F_lambda_ilvG_rfb_50_rph_1			ArrayExpress	affymetrix	1		0	0	0
E-TABM-103_t9			ArrayExpress	affymetrix	1		0.310341	-4.4427e-11	-1.20519e-11
GSE6425_MG1655_aerobic_5			GEO	affymetrix	1		0.147948	1.94791e-11	1.22824e-10
GSE4778_t10_ph5.5			GEO	affymetrix	1		0.947107	-6.49536e-11	9.61094e-12
GSE7265_WT_tp15			GEO	cDNA	1		0.316259	8.72353	5.54598e-12
GSE8965_SA_tp4			GEO	cDNA	1		0.288553	3.32408e-10	5.81343e-10
GSE6425_UTI89_aerobic_19.5			GEO	affymetrix	1		0.0926053	8.39468e-11	-2.44076e-11
GSE3665_mut3_20g/l_etOH			GEO	affymetrix	1		0.403022	1.13359e-11	-3.69506e-12
GSE4556_ph5.7			GEO	affymetrix	1		0.79637	-4.56505e-11	2.08931e-11
GSE7265_WT_tp5			GEO	cDNA	1		0.33894	7.30619	-9.81272e-14
GSE7573_MOPS_SeOh_5min			GEO	cDNA	1		0.752491	1.8865e-11	-1.77912e-11
GSE6425_UTI89_aerobic_8			GEO	affymetrix	1		0.152071	-1.61073e-11	5.71048e-11
E-TABM-103_t6.7			ArrayExpress	affymetrix	1		0.392274	3.43402e-11	2.37362e-12
GSE6425_UTI89_anaerobic_2.5			GEO	affymetrix	0		0.469699	1.94801e-09	-4.31498e-09
GSE4394_wt_rif_1.5min			GEO	cDNA	1		0.955859	7.60576e-12	-1.81985e-11
GSE4394_wt_rif_1.5min			GEO	cDNA	1		1.01058	5.82158e-11	1.89315e-10
GSE6712_benzalkonium_chloride			GEO	p33	1		0.17494	6.57466e-12	4.82508
GSE4394_rhlB_rif_4.5min			GEO	cDNA	1		0.908239	-4.08082e-10	3.18158e-10
GSE7398_fis_240			GEO	affymetrix	1		0.108104	8.23223e-12	0.744673
GSE8965_SA_tp3			GEO	cDNA	1		0.281873	-2.12881e-11	-3.1716e-11
E-MEXP-584_urine			ArrayExpress	affymetrix	1		0.367919	-4.61425e-11	-1.89502e-11
GSE6425_UTI89_anaerobic_4			GEO	affymetrix	0		0.161895	8.95253e-11	7.60569e-11
GSE6426_MG1655			GEO	affymetrix	1		0.444575	8.27625	1.22294e-09
GSE2140_tet_inducible_sig32_t10			GEO	affymetrix	1		0.106199	1.86327	3.34728e-09
GSE7265_WT_tp1			GEO	cDNA	1		0.99691	1.82115e-11	4.47788e-11
E-MEXP-1166_MG1655			ArrayExpress	cDNA	1		0.590846	-5.13725e-10	-2.71036e-10
E-TABM-103_t4.6			ArrayExpress	affymetrix	1		0	0	0
GSE7_trpR2_15ug/ml_inda			GEO	cDNA	1		0.294567	5.63097	7.0994e-10
GSE9814_wt			GEO	affymetrix	1		0.796472	-3.20117e-13	-3.36534e-12
GSE3283_wt_leucine			GEO	cDNA	1		0.48465	7.95684	-8.56891e-12
GSE8965_FA_tp3			GEO	cDNA	1		0.875449	3.06463e-11	-5.20436e-11
GSE6923_BW25113_wt_R1drd19_7_LB			GEO	affymetrix	1		0.100808	2.1321e-11	-6.64665e-11
E-MEXP-1166_MGAdp_glu1000g			ArrayExpress	cDNA	1		0.330168	2.90102	1.05613e-10
GSE4394_rhlB			GEO	cDNA	1		0.636509	-1.85917e-12	2.97394e-11
GSE4394_rhlB_rif_1.5min			GEO	cDNA	1		0.957613	2.64489e-11	4.0917e-12
GSE4778_t0_ph7.6			GEO	affymetrix	1		0.988291	2.42504e-11	9.68628e-12
GSE8965_FA_tp3			GEO	cDNA	1		0.4636	-3.29519e-11	4.59946
GSE7265_WT_tp3			GEO	cDNA	1		0.987957	4.26702e-11	-3.52149e-11
GSE4556_ph7.0			GEO	affymetrix	1		0.57467	3.39432e-10	-8.60473e-10
GSE6609_D1_aerobic			GEO	cDNA	1		0.386353	8.79157e-12	3.0642e-12
E-MEXP-1166_MGAdp_glu1000g			ArrayExpress	cDNA	1		0.622751	-1.30785e-11	-3.43065e-11
GSE7573_wt_MOPS_DeaNO_5min			GEO	cDNA	1		0.552985	7.022e-10	4.12378e-10
GSE7439_luxS_dpd			GEO	affymetrix	1		0	0	0
GSE4394_RNaseE_N			GEO	cDNA	1		0.148399	3.10739e-11	-1.33504e-11
GSE6992_wt_paraquat_t10			GEO	affymetrix	1		0.51132	-5.86016e-11	-2.06445e-10
GSE7398_fis_150			GEO	affymetrix	1		0.239226	3.21335e-10	4.25996
GSE9_UV_40			GEO	cDNA	1		0.361528	3.65851e-12	3.67964e-11
E-MEXP-1166_MGAdp_glu1000g			ArrayExpress	cDNA	1		0.961361	3.38486e-11	-2.70648e-11
GSE4562_tnaA			GEO	affymetrix	1		0.638987	-1.87304e-11	6.20143e-12
GSE9_lexA_UV_20			GEO	cDNA	1		0.99978	4.80077e-11	-1.67391e-11
GSE6425_MG1655_aerobic_26			GEO	affymetrix	1		0.104704	6.16173e-11	-6.64104e-11
GSE6444_hfq_rpoEinduced_IPTG			GEO	cDNA	1		0.613323	1.41292e-11	-4.54463e-11
GSE4394_eno_rif_3min			GEO	cDNA	1		0.228738	-8.40741e-12	9.27404e-11
GSE4394_rhlB_rif_1.5min			GEO	cDNA	1		0.940436	7.33989e-11	4.67723e-11
GSE7265_WT_tp11			GEO	cDNA	1		0.631207	5.89773	-9.22677e-12
GSE7398_wt_360			GEO	affymetrix	1		0.160827	-8.42634e-11	-7.4116e-09
GSE6444_hfq			GEO	cDNA	1		0.984186	-8.37999e-11	-2.70773e-11
GSE3665_mut3_40g/l_etOH			GEO	affymetrix	1		0.401685	2.58877e-11	1.23209e-11
GSE7573_wt_MOPS_DeaNO_5min			GEO	cDNA	1		0.923991	2.79606e-12	1.07884e-11
GSE4556_ph7.0			GEO	affymetrix	1		0.715552	1.43344	3.24955e-12
GSE3123_rne_pRNG3			GEO	cDNA	1		0.25674	-2.25299e-11	7.22765
GSE8540_wt_GSNO500_5min			GEO	cDNA	1		0.730707	1.51585e-11	-4.33705e-12
GSE6426_UTI89			GEO	affymetrix	1		0	0	0
GSE9755_1perc_tannine			GEO	affymetrix	1		0.239347	-9.59033e-11	1.89868e-09
GSE7_trpR2_10ug/ml			GEO	cDNA	1		0.235826	5.26031e-10	4.59157e-09
E-MEXP-926_MOPS_glucose_VR50			ArrayExpress	affymetrix	1		1.01056	3.52515e-12	4.50851e-12
GSE6609_D3_aerobic_lon			GEO	cDNA	1		0.455697	1.33652e-10	3.81274e-11
E-TABM-103_t16			ArrayExpress	affymetrix	1		0.384893	-2.39666e-11	-1.49759e-10
E-MEXP-1177_mucus			ArrayExpress	affymetrix	1		0.319494	-3.37923e-10	-1.29856e-09
GSE6425_MG1655_anaerobic_3.75			GEO	affymetrix	0		0.109939	3.72872e-11	-1.82044e-10
GSE7265_WT_tp8			GEO	cDNA	1		1.01056	-1.6198e-10	3.13182e-11
GSE8965_SA_tp1			GEO	cDNA	1		0.208433	1.4929e-10	5.00145
GSE3123_pRNG3			GEO	cDNA	1		0.805409	4.84945e-10	3.23403e-10
GSE4344_M9_abundance			GEO	cDNA	1		0.215055	9.06168e-11	-1.55692e-10
GSE6609_D3_anaerobic_lon			GEO	cDNA	0		0.606788	-1.20218e-11	-8.94466e-14
GSE8965_FA_tp2			GEO	cDNA	1		0.20215	3.41333	-1.70032e-11
E-MEXP-1166_MGStat_prolonged_stat_phase_37d			ArrayExpress	cDNA	1		0.582321	-8.12622e-10	-5.15237e-10
E-MEXP-1166_MGStat_prolonged_stat_phase_37d			ArrayExpress	cDNA	1		0.415683	-7.42484e-11	3.43614e-11
GSE7_10ug/ml_indaa_5min			GEO	cDNA	1		0.143233	4.51876	-2.66641e-11
GSE9587_wt			GEO	affymetrix	1		0.977837	1.98435e-12	1.57758e-12
GSE4394_rhlB			GEO	cDNA	1		0.484386	-5.22499e-11	-2.59425e-11
GSE7265_WT_tp10			GEO	cDNA	1		0.31479	11.9624	1.34972e-11
E-MEXP-953_T20_MG1655_Stationary_planktonic_F_lambda_ilvG_rfb_50_rph_1			ArrayExpress	affymetrix	1		0.328339	-6.84331e-12	-1.64657e-11
GSE4394_eno_rif_6min			GEO	cDNA	1		0.40137	3.04672e-11	-2.49258e-11
GSE9203_isrR			GEO	affymetrix	1		0.124338	11.2175	7.71246e-11
E-MEXP-910_MG_kan_N15+			ArrayExpress	affymetrix	1		0.748066	4.17229e-11	4.28411e-11
GSE7573_metJ_MOPS_DeaNO_5min			GEO	cDNA	1		0.0729703	14.5092	-7.78427e-10
GSE7398_wt_150			GEO	affymetrix	1		0.207698	-4.92889e-10	0.73114
GSE3283_Irp_leucine			GEO	cDNA	1		0.572264	6.67597	-5.94618e-12
E-MEXP-1166_DHAdp_glu1000g			ArrayExpress	cDNA	1		0.309726	4.41679	7.99382e-11
GSE9_lexA_UV_60			GEO	cDNA	1		0.733464	6.37553e-12	-6.79851e-12
GSE6781_pGIT8_NO2			GEO	cDNA	1		0.48295	-3.94162e-11	5.09643
GSE4778_t5_ph5.5			GEO	affymetrix	1		0.939633	-2.9619e-10	7.22108e-11
GSE6781_pGIT1			GEO	cDNA	1		0.529706	-6.98446e-11	6.1514e-10
GSE5098_norR_anaeroob_NOC5/7			GEO	cDNA	0		0.0475735	9.60757	3.87959e-10
GSE5981_rsd_overexpr_OD0.4			GEO	cDNA	1		0.571506	7.55524	-5.73931e-13
GSE9203_isrK			GEO	affymetrix	1		0.309629	8.04155	0.210211
GSE8540_dpp_GSNO100_5min			GEO	cDNA	1		0.997197	6.8594e-12	-8.38613e-12
GSE6992_soxR_paraquat_t10			GEO	affymetrix	1		0.20571	6.18342	4.31338e-11
GSE7573_arcA_MOPS_DeaNO_5min			GEO	cDNA	1		0.210301	1.81034e-10	1.70517e-09
GSE7398_wt_360			GEO	affymetrix	1		0.121304	-1.29015e-11	1.67906
GSE4383_ptrc99A_rraA_KSL2000			GEO	cDNA	1		0.135886	4.05074	1.2565e-09
GSE9388_4h_AI_2			GEO	affymetrix	1		0.372196	6.89997	4.0816e-11
GSE8540_flhDC_GSNO500_5min			GEO	cDNA	1		0.928619	-1.69518e-13	1.53684e-11
GSE3665_mut1_0g/l_etOH			GEO	affymetrix	1		0.340119	-8.0208e-11	-4.71626e-13
GSE7243_wt			GEO	affymetrix	1		0.306943	9.95704	1.77011e-11
GSE6444_rseA			GEO	cDNA	1		0.759872	-1.56653e-11	4.79952e-11
GSE2140_tet_inducible_sig32_t10			GEO	affymetrix	1		0.105089	2.18836	2.58838
E-MEXP-732_p5			ArrayExpress	affymetrix	1		0.973667	-6.73666e-11	-4.9646e-11
GSE6425_MG1655_aerobic_8			GEO	affymetrix	1		0.115006	-6.72292e-12	-8.1079e-12
GSE4394_wt_rif_6min			GEO	cDNA	1		0.666834	1.00572e-10	1.96652e-10
GSE5098_aeroob_NOC5/7			GEO	cDNA	1		0.188142	4.70953e-10	-2.50715e-10
GSE6609_D1_anaerobic			GEO	cDNA	0		0.702825	-1.06083e-10	-4.24983e-11
E-MEXP-584_urine			ArrayExpress	affymetrix	1		0.324746	1.13847e-10	-7.08905e-11
GSE6425_UTI89_aerobic_26			GEO	affymetrix	1		0.106573	-1.60232e-10	-3.20856e-10
GSE7_60min			GEO	cDNA	1		0.761027	1.31295	5.79799e-10
GSE4383_rraA_OD:1			GEO	cDNA	1		0.331295	-5.42589e-09	1.27091e-08
GSE4556_ph5.7			GEO	affymetrix	1		0.819949	3.54628e-12	-1.91216e-11
GSE6609_D3_anaerobic			GEO	cDNA	0		0.36449	-8.80245e-12	-1.63834e-11
GSE8965_FA_tp1			GEO	cDNA	1		0.539246	5.85916	-1.89138e-11
GSE3665_wt_20g/l_etOH			GEO	affymetrix	1		0.313976	-1.99555e-11	-1.85187e-11
GSE9_UV_60			GEO	cDNA	1		0.927739	-2.03974e-11	-4.17652e-12
GSE8540_flhDC_GSNO500_5min			GEO	cDNA	1		0.968498	9.34958e-12	-8.07103e-12
GSE7265_WT_tp14			GEO	cDNA	1		0.342463	-1.29562e-11	-7.10435e-11
GSE8965_FA_tp3			GEO	cDNA	1		0.286668	2.60153e-10	-2.40577e-10
GSE7265_WT_tp4			GEO	cDNA	1		0.751552	-2.66992e-11	6.56515e-11
GSE6425_UTI89_anaerobic_3			GEO	affymetrix	0		0.292637	-3.14951e-09	4.52514e-10
GSE6425_MG1655_aerobic_12			GEO	affymetrix	1		0.111415	-6.40084e-12	-2.89956e-11
GSE8540_metJ_GSNO500_5min			GEO	cDNA	1		0.947587	4.34183e-12	-2.83418e-13
GSE8965_FA_tp4			GEO	cDNA	1		0.845354	2.16987	3.39303e-11
GSE6712_benzalkonium_chloride			GEO	p33	1		0.18088	2.67391	4.81004e-10
GSE11087_relA_spoT_ile_starvation			GEO	affymetrix	1		0.285239	-1.29225e-11	3.08596e-12
GSE7265_WT_tp7			GEO	cDNA	1		0.602317	5.40621	-8.61976e-12
E-TABM-103_t6.7			ArrayExpress	affymetrix	1		0.508856	-3.65218e-11	3.69448e-11
GSE7265_WT_tp17			GEO	cDNA	1		0.18581	7.54451	1.18484e-10
GSE6425_UTI89_anaerobic_6			GEO	affymetrix	0		0.111058	-3.94637e-11	6.61382e-11
GSE7_trpR2_50ug/ml			GEO	cDNA	1		0.39599	-8.86448e-10	-1.52209e-08
GSE6425_MG1655_anaerobic_4.5			GEO	affymetrix	0		0.113342	-1.09732e-10	-1.73908e-10
GSE9814_rpoS			GEO	affymetrix	1		0.800612	-1.61822e-10	3.23704e-10
E-MEXP-1166_MGStat_prolonged_stat_phase_37d			ArrayExpress	cDNA	1		0.505717	5.49327	-7.88313e-11
GSE4394_wt_rif_3min			GEO	cDNA	1		0.558096	3.93728	-8.32511e-11
GSE6923_BW25113_wt_15_LB			GEO	affymetrix	1		0.872289	1.89747	-4.54408e-12
GSE2140_tet_inducible_sig32_t5			GEO	affymetrix	1		0.200736	7.13484	-6.4368e-11
E-MEXP-1001_suspension_exp			ArrayExpress	affymetrix	1		0.17616	1.19744e-11	-1.30714e-11
GSE5552_epinephrine			GEO	affymetrix	1		0.917101	-1.31162e-10	-1.98655e-09
GSE4778_t1_ph5.5			GEO	affymetrix	1		0.98561	-4.5768e-11	-6.62919e-11
GSE7573_argR_MOPS_DeaNO_5min			GEO	cDNA	1		0.526896	6.89046	1.66815
GSE8540_wt_DPTA_5min			GEO	cDNA	1		0.830008	-8.98001e-12	-5.87595e-12
GSE4394_rhlB_rif_6min			GEO	cDNA	1		0.907623	-1.54055e-10	-1.35366e-10
GSE6923_ATCC25404_wt_R1drd19_24_LB			GEO	affymetrix	1		0.943246	-6.37866e-12	2.52087e-11
GSE8965_FA_tp3			GEO	cDNA	1		0.409168	0.200857	-1.58251e-11
GSE4394_rhlB_rif_3min			GEO	cDNA	1		0.948367	-5.22899e-11	-4.73222e-11
GSE7_10ug/ml_indaa_60min			GEO	cDNA	1		0.0603269	7.64848	-1.12365e-09
GSE7398_fis_360			GEO	affymetrix	1		0.160396	3.18041e-10	5.63359
GSE6992_wt_paraquat_t2			GEO	affymetrix	1		0.452047	-1.44621e-10	2.39522e-10
GSE7265_WT_tp3			GEO	cDNA	1		0.997396	-5.28089e-12	4.13956e-12
E-MEXP-926_urine_biofilm_83972			ArrayExpress	affymetrix	1		0.200002	1.37724e-10	1.71725e-10
GSE8540_wt_GSNO100_5min			GEO	cDNA	1		0.392493	1.21825e-11	1.3295e-11
GSE8540_metJ_GSNO500_5min			GEO	cDNA	1		0.832779	-2.94629e-10	6.75839e-11
GSE6712_benzalkonium_chloride			GEO	p33	1		0.440605	2.2278	-1.08409e-10
E-MEXP-953_T48_K12_Biofilm_biofilm_F+Lampda+			ArrayExpress	affymetrix	1		0	0	0
GSE1154_DH5alpha			GEO	affymetrix	1		0.0647401	-4.71397e-13	4.76307e-11
GSE6425_UTI89_aerobic_2.5			GEO	affymetrix	1		0.517901	-3.32633e-11	0.480216
GSE4344_M9_abundance			GEO	cDNA	1		0.33809	-1.99557e-10	-5.99621e-11
GSE6712_control			GEO	p33	1		0.374266	4.5119	6.72567e-10
GSE11087_wt_ile_starvation			GEO	affymetrix	1		0.563186	3.39741e-10	-2.4056e-09
GSE4394_wt_rif_3min			GEO	cDNA	1		0.82194	-4.67328e-11	1.54991e-11
GSE4556_ph8.5			GEO	affymetrix	1		0	0	0
GSE5098_aeroob_NOC5/7			GEO	cDNA	1		0.143032	-8.9087e-10	-7.04879e-09
GSE7398_wt_150			GEO	affymetrix	1		0.193236	-2.93623e-10	5.57529
E-MEXP-926_urine_biofilm_83972			ArrayExpress	affymetrix	1		0.213376	1.26046	2.026e-10
GSE6444_rpoEinduced_IPTG			GEO	cDNA	1		0.991731	-1.56641e-12	1.48042e-11
GSE4394_RNaseE_N_rif_4.5min			GEO	cDNA	1		0.947925	-1.26152e-10	6.30694e-12
GSE7265_WT_tp11			GEO	cDNA	1		0.957399	5.03293e-13	9.94463e-12
GSE6444_hfq			GEO	cDNA	1		1.00354	-9.92808e-12	7.61016e-12
GSE6426_UTI89			GEO	affymetrix	1		0	0	0
GSE7573_nsrR_hmpA_MOPS_DeaNO_5min			GEO	cDNA	1		0.277108	-1.13756e-12	8.97008
E-MEXP-953_T48_MG1655_Biofilm_biofilm_F_lambda_ilvG_rfb_50_rph_1			ArrayExpress	affymetrix	1		0.31656	4.34481	3.5702e-10
GSE7_50ug/mltrp_5min			GEO	cDNA	1		0.349779	6.53517e-10	-2.18551e-10
GSE6444_rpoEinduced_IPTG			GEO	cDNA	1		0.822345	3.8755e-12	1.09019e-11
GSE8540_wt_GSNO500_5min			GEO	cDNA	1		0.470979	1.63066e-12	0.0523295
GSE6609_D3_aerobic_lon			GEO	cDNA	1		0.253478	3.45357	-3.57862e-10
GSE4394_pnp_rif_1.5min			GEO	cDNA	1		0.964011	-1.66593e-11	9.22113e-12
GSE7265_WT_tp13			GEO	cDNA	1		1.01068	-1.48178e-12	-7.89213e-12
GSE6609_D3_anaerobic			GEO	cDNA	0		0.259286	5.48596e-10	6.12444e-12
GSE8540_met_suppl_GSNO500_5min			GEO	cDNA	1		0.62929	1.34726e-11	-8.32619e-11
GSE6609_D3_aerobic_lon			GEO	cDNA	1		0.288724	2.07175	3.46263
E-MEXP-584_pat2			ArrayExpress	affymetrix	1		0.642924	0.666797	4.21977e-10
GSE8540_wt_GSNO100_5min			GEO	cDNA	1		0.996415	6.93231e-11	1.41933e-11
GSE8965_FA_tp2			GEO	cDNA	1		0.95084	-4.11224e-12	-2.86621e-12
E-TABM-103_t9			ArrayExpress	affymetrix	1		0.51458	-9.54662e-11	-4.01975e-11
GSE7265_WT_tp17			GEO	cDNA	1		0.209673	10.8849	-1.36319e-10
GSE4562_yceB_glucose			GEO	affymetrix	1		0.716731	5.26406e-12	-1.46547e-11
E-TABM-103_t7.8			ArrayExpress	affymetrix	1		0.534863	1.7773e-11	6.14099e-11
E-MEXP-584_pat1			ArrayExpress	affymetrix	1		0.698625	1.95642e-10	2.85226e-10
GSE7265_WT_tp9			GEO	cDNA	1		0.469928	7.50768	7.1674e-12
GSE9_lexA_20			GEO	cDNA	1		0.977778	0.438465	4.7028e-12
GSE7398_fis_360			GEO	affymetrix	1		0.113557	-2.64529e-10	0.974191
GSE4394_eno			GEO	cDNA	1		0.279476	2.129e-10	1.37997
GSE9_UV_60			GEO	cDNA	1		0.560574	8.88349e-12	-2.96999e-11
E-TABM-103_t6.1			ArrayExpress	affymetrix	1		0.587308	2.1848e-11	3.68253e-11
GSE1154_MG1655_F_plasmid			GEO	affymetrix	1		0.150445	5.06594	-2.63944e-11
GSE7573_metJ_MOPS_DeaNO_5min			GEO	cDNA	1		1.00077	-3.30126e-11	1.01548e-11
GSE6712_benzalkonium_chloride+50ppm			GEO	p33	1		0.257693	9.43717	1.59891
GSE4778_t10_ph5.5			GEO	affymetrix	1		0.517135	-9.30875e-11	4.35132
GSE6992_wt_paraquat_t2			GEO	affymetrix	1		0.950227	-2.01896e-11	-5.97985e-12
GSE7573_wt_MOPS_DeaNO_5min			GEO	cDNA	1		0.965494	-1.27294e-11	1.20142e-11
GSE9388_4.5h_AI_2			GEO	affymetrix	1		0.339035	8.02097	1.28636e-11
E-MEXP-1166_DHAdp_glu1000g			ArrayExpress	cDNA	1		0.740007	-3.22686e-10	-2.98481e-09
E-MEXP-732_p5_g21			ArrayExpress	affymetrix	1		0.849385	0.635381	-2.00801e-11
GSE6425_UTI89_aerobic_26			GEO	affymetrix	1		0.107528	-4.81006e-11	1.49692e-10
GSE3123_rng_pM30			GEO	cDNA	1		0.97162	1.18232e-11	-3.5028e-11
GSE8540_dpp_GSNO100_5min			GEO	cDNA	1		0.953752	5.67396e-11	-1.6955e-11
GSE8540_cys_suppl_GSNO500_5min			GEO	cDNA	1		0.63157	6.52154	8.81637e-11
GSE8540_nsrR_GSNO500_5min			GEO	cDNA	1		1.00458	1.39081e-11	5.60619e-11
GSE7573_norR_MOPS_DeaNO_5min			GEO	cDNA	1		0.281589	12.5269	2.02189e-10
GSE5981_rsd_overexpr_stat_phase			GEO	cDNA	1		0.942357	7.49169e-12	5.5875e-12
E-MEXP-1166_MGAdp_glu1000g			ArrayExpress	cDNA	1		0.551862	-9.78796e-11	0.823437
GSE7_15ug/ml_indaa_15min			GEO	cDNA	1		0.233564	3.31236e-10	-1.29575e-11
GSE6195_biofilm			GEO	affymetrix	1		0.295787	6.3439e-11	-2.60211e-10
GSE6609_D3_anaerobic_lon			GEO	cDNA	0		0.293685	5.94156	-3.1496e-10
GSE8965_FA_tp1			GEO	cDNA	1		0	0	0
GSE6425_UTI89_anaerobic_3.5			GEO	affymetrix	0		0.327219	1.58615e-10	-9.77714e-10
GSE5981_rsd_overexpr_stat_phase			GEO	cDNA	1		0.525611	-2.01926e-11	6.87866
GSE7265_WT_tp14			GEO	cDNA	1		0.345677	4.02303e-11	3.52437e-11
GSE11087_relA_ile_starvation			GEO	affymetrix	1		0.31753	5.33489e-12	-1.15391e-11
GSE6426_MG1655			GEO	affymetrix	1		0.688409	4.86826e-11	1.60592e-10
GSE8965_FA_tp1			GEO	cDNA	1		0.672356	-7.13735e-10	4.0705e-08
GSE8965_FA_tp4			GEO	cDNA	1		0.133832	-1.08722e-11	-2.32585e-11
GSE4394_wt_rif_6min			GEO	cDNA	1		0.359886	4.45794e-12	-3.64888e-11
GSE7573_wt_MOPS_DeaNO_5min			GEO	cDNA	1		0.900284	-4.27801e-11	3.10757e-11
GSE4394_rhlB_rif_1.5min			GEO	cDNA	1		0.933735	0.822354	-1.23957e-11
GSE7573_iscR_MOPS_DeaNO_5min			GEO	cDNA	1		0.67013	5.08947e-11	3.74484
GSE4394_eno			GEO	cDNA	1		0.948236	7.36514e-11	-7.43394e-11
GSE3665_mut3_20g/l_etOH			GEO	affymetrix	1		0.257099	-2.56494e-10	-3.58011e-10
GSE4778_t1_ph5.5			GEO	affymetrix	1		0.965983	2.64077e-11	2.94989e-11
GSE6444_rseA			GEO	cDNA	1		0.425052	0.606147	8.60233e-11
E-MEXP-926_MOPS_glucose_VR50			ArrayExpress	affymetrix	1		1.0106	-1.52119e-11	5.23823e-12
GSE5552_norepinephrine			GEO	affymetrix	1		0	0	0
GSE9814_rpoS			GEO	affymetrix	1		0.681784	8.96472e-11	8.11274e-11
GSE7265_WT_tp16			GEO	cDNA	1		0.390835	6.44752	-2.0369e-10
E-MEXP-953_T48_K12_Biofilm_biofilm_F+Lampda+			ArrayExpress	affymetrix	1		1.00238	-8.3589e-12	3.97747e-12
GSE6992_soxR_paraquat_t0			GEO	affymetrix	1		0.230105	2.39316	-2.42748e-10
GSE4394_eno_rif_3min			GEO	cDNA	1		0.221029	1.11673e-10	-3.44831e-10
GSE7265_WT_tp6			GEO	cDNA	1		0.37301	10.9721	-7.95582e-12
E-MEXP-1166_MGAdp_glu1000g			ArrayExpress	cDNA	1		0.72188	1.74207e-11	1.22015e-11
GSE6425_MG1655_aerobic_18			GEO	affymetrix	1		0.106117	-1.41962e-11	-1.58888e-10
GSE4394_pnp_rif_6min			GEO	cDNA	1		0.933102	-1.78367e-11	-1.9102e-12
GSE4778_t1_ph5.5			GEO	affymetrix	1		0.713223	2.91841e-11	3.54815e-10
GSE7573_wt_MOPS_methionine_DeaNO_5min			GEO	cDNA	1		0.957795	9.49603e-11	2.88317e-11
GSE3123_rng_pM30			GEO	cDNA	1		0.494711	7.57669	-2.47806e-11
GSE6923_MG1655_wt_R1drd19_24_m9			GEO	affymetrix	1		0.948822	-1.47986e-11	1.86329e-11
GSE6992_wt_paraquat_t6			GEO	affymetrix	1		0.382253	3.30722e-11	9.56663e-12
GSE7573_argR_MOPS_DeaNO_5min			GEO	cDNA	1		0.0670286	10.3367	8.14389e-13
GSE3665_mut3_40g/l_etOH			GEO	affymetrix	1		0.271103	-3.73234e-11	-6.35744e-11
GSE5905_hoxEFUYH_pBSkan			GEO	affymetrix	1		0.202333	1.46529e-09	6.13637e-10
GSE2140_tet_inducible_sig32_t15			GEO	affymetrix	1		0.113502	1.11782	-2.2237e-08
GSE7398_fis_150			GEO	affymetrix	1		0.182664	-5.94441e-10	1.93147
GSE8965_SA_tp3			GEO	cDNA	1		0.112309	5.96008	1.07575e-11
GSE9582_wt			GEO	affymetrix	1		0.588927	-9.2851e-11	5.76377e-12
GSE6712_control			GEO	p33	1		0.187386	1.97205	2.95398
GSE7_15ug/ml_indaa_60min			GEO	cDNA	1		0.160607	1.6189	3.08045e-11
GSE7265_WT_tp2			GEO	cDNA	1		1.0073	-5.54569e-12	-3.01088e-11
GSE4556_ph8.5			GEO	affymetrix	1		0	0	0
GSE8540_met_suppl_GSNO500_5min			GEO	cDNA	1		0.985096	2.2122e-10	-3.34511e-11
GSE7398_wt_360			GEO	affymetrix	1		0.14921	2.7502e-10	0.73484
GSE7398_fis_360			GEO	affymetrix	1		0.195898	1.9844e-10	2.75149
E-MEXP-1001_suspension_stat			ArrayExpress	affymetrix	1		0.138512	-7.48533e-12	-1.5012e-10
E-MEXP-584_pat3			ArrayExpress	affymetrix	1		0.387609	9.53744e-12	-1.48e-10
GSE7_60min			GEO	cDNA	1		0.0573897	10.7742	2.92611e-10
GSE4394_wt_rif_4.5min			GEO	cDNA	1		0.945446	2.01105e-11	-3.83727e-11
GSE8706_yncC_biofilm			GEO	affymetrix	1		0.628874	4.60204e-12	-3.27832e-11
GSE7573_norR_MOPS_DeaNO_5min			GEO	cDNA	1		0.749501	4.42789	-4.62939e-11
GSE3665_mut3_0g/l_etOH			GEO	affymetrix	1		0.46418	-1.08069e-10	8.93746e-10
GSE7573_wt_MOPS_DeaNO_5min			GEO	cDNA	1		0.76765	7.54563e-11	-5.75098e-10
E-MEXP-1166_MGStat_prolonged_stat_phase_37d			ArrayExpress	cDNA	1		0.537262	0.056606	-8.78591e-10
GSE3665_mut3_40g/l_etOH			GEO	affymetrix	1		0.352432	1.24222e-11	2.6258e-11
GSE4569_50h_UV			GEO	cDNA	1		0.3585	1.34078e-10	1.79273e-11
GSE4383_ptrc99A_rraA_KSL2009			GEO	cDNA	1		0.369114	10.2738	-1.39436e-11
GSE6609_D3_anaerobic			GEO	cDNA	0		0.329009	9.28217e-11	3.21638e-10
GSE2140_tet_inducible_sig32_t0			GEO	affymetrix	1		0.10144	6.29768	-1.67105e-09
GSE4556_ph5.7			GEO	affymetrix	1		0.821222	-3.6268e-11	-2.36774e-11
GSE6609_D3_aerobic			GEO	cDNA	1		0.386703	-2.80469e-10	-5.43712e-11
GSE7265_WT_tp12			GEO	cDNA	1		0.995115	1.81872e-11	-3.75695e-11
E-MEXP-953_T48_K12_Biofilm_biofilm_F+Lampda+			ArrayExpress	affymetrix	1		0	0	0
GSE6444_hfq			GEO	cDNA	1		0.535935	-6.42683e-11	8.95714
GSE4394_wt_rif_1.5min			GEO	cDNA	1		0.935479	6.73856e-11	-1.49276e-12
GSE4562_wt_glucose			GEO	affymetrix	1		0.715081	-5.10617e-11	2.39924e-11
E-MEXP-732_p5_g21			ArrayExpress	affymetrix	1		0.649727	4.85294	-1.31065e-12
GSE5098_aeroob_NOC5/7			GEO	cDNA	1		0.520208	7.7933e-11	0.138795
GSE8540_wt_GSNO100_5min			GEO	cDNA	1		0.897114	4.27653e-12	1.63711e-12
GSE7_50ug/mltrp_15min			GEO	cDNA	1		0.703589	-5.37518e-11	1.52875e-10
GSE8965_SA_tp2			GEO	cDNA	1		0.219161	6.18887e-12	1.19234e-11
GSE4394_RNaseE_N_rif_6min			GEO	cDNA	1		0.904971	1.68806e-10	-2.72435e-12
GSE6781_pGIT1			GEO	cDNA	1		0.973625	1.90194e-11	-2.64905e-11
GSE4778_t10_ph5.5			GEO	affymetrix	1		0.948414	-1.81079e-11	2.38682e-12
GSE4383_rraA_OD:0.3			GEO	cDNA	1		0.904618	-2.33934e-11	-2.36942e-10
GSE4562_yceB_glucose_indole			GEO	affymetrix	1		0.553735	-1.97619e-10	2.76252e-11
E-MEXP-1166_DHAdp_glu1000g			ArrayExpress	cDNA	1		0.869724	1.87825	1.79037e-10
GSE6195_biofilm_7_hydroxy_indole			GEO	affymetrix	1		0.231209	-5.47333e-11	-2.16639e-11
GSE4344_LB_abundance			GEO	cDNA	1		0.885517	1.68284	5.06342e-12
GSE6296_HEPES			GEO	cDNA	1		0.335631	10.5656	2.14648e-10
GSE7_wt_15ug/ml_inda			GEO	cDNA	1		0.577221	1.09216	4.2801e-11
GSE7398_wt_150			GEO	affymetrix	1		0.647016	5.7628e-12	6.0381e-12
GSE6712_benzalkonium_chloride+50ppm			GEO	p33	1		0.429377	4.4856	2.51696e-10
GSE7265_WT_tp9			GEO	cDNA	1		1.0107	-5.72282e-12	-4.91784e-12
GSE7573_iscR_MOPS_DeaNO_5min			GEO	cDNA	1		0.872174	-3.70504e-11	0.528623
GSE9388_5.5h_AI_2			GEO	affymetrix	1		0.762907	4.26613	2.13797e-12
E-MEXP-953_T48_MG1655_Biofilm_biofilm_F_lambda_ilvG_rfb_50_rph_1			ArrayExpress	affymetrix	1		0.995953	1.77765e-11	-1.05662e-11
GSE6425_MG1655_anaerobic_2.5			GEO	affymetrix	0		0.239708	-5.35539e-10	3.19535e-09
GSE4394_RNaseE_N_rif_6min			GEO	cDNA	1		0.94213	-7.4002e-13	-1.11202e-10
E-TABM-103_t6.1			ArrayExpress	affymetrix	1		0.627337	-1.2961e-10	-8.83976e-11
GSE6781_pGIT1_NO2			GEO	cDNA	1		0	0	0
E-MEXP-926_urine_biofilm_VR50			ArrayExpress	affymetrix	1		0.168889	-9.76365e-11	3.96112e-11
E-MEXP-926_urine_83972			ArrayExpress	affymetrix	1		0.34201	4.31793	2.76992e-11
GSE4394_rhlB			GEO	cDNA	1		0.369047	9.2156e-11	-5.66538e-10
GSE9_UV_10			GEO	cDNA	1		0.476621	-4.47128e-11	-6.1932e-11
E-MEXP-953_T20_MG1655_Stationary_planktonic_F_lambda_ilvG_rfb_50_rph_1			ArrayExpress	affymetrix	1		0.296958	-3.4327e-11	-4.85564e-11
GSE9_lexA_60			GEO	cDNA	1		0.602228	2.61855e-11	-1.2094e-09
GSE8540_nsrR_GSNO500_5min			GEO	cDNA	1		0.806621	8.26782e-13	1.07876e-11
GSE7573_norR_MOPS_DeaNO_5min			GEO	cDNA	1		1.01058	3.11919e-11	-8.76938e-11
GSE4394_wt_rif_4.5min			GEO	cDNA	1		0.699895	-1.14093e-11	3.55639e-11
GSE6444_rseA			GEO	cDNA	1		1.00397	-5.06343e-11	1.771e-11
E-TABM-103_t16			ArrayExpress	affymetrix	1		0.533053	1.8647e-11	4.10573e-10
GSE11087_wt_ile_starvation			GEO	affymetrix	1		0.876731	2.12056e-10	-3.78078e-10
GSE3123_rne_pBADRNE_noIPTG			GEO	cDNA	1		0.444514	2.90374e-10	9.82494
GSE5177_cueO			GEO	cDNA	1		0.543365	1.91335e-12	3.07494
GSE5981_rsd_overexpr_OD1.1			GEO	cDNA	1		0.538925	-1.88926e-11	3.95447
GSE2140_tet_inducible_sig32_t15			GEO	affymetrix	1		0.141491	1.49101e-10	2.91044
GSE4394_rhlB_rif_6min			GEO	cDNA	1		0.91871	-1.60615e-11	2.7922e-11
GSE7573_arcA_MOPS_DeaNO_5min			GEO	cDNA	1		1.00395	1.27118e-10	-1.45084e-11
GSE7_50ug/mltrp_60min			GEO	cDNA	1		0.696373	1.70518e-10	6.96943e-10
GSE3283_Irp			GEO	cDNA	1		0.284928	11.0318	9.25755e-12
GSE4778_t5_ph5.5			GEO	affymetrix	1		0.911695	-1.65421e-11	1.98202e-11
GSE8965_SA_tp1			GEO	cDNA	1		0.914252	-2.07359e-11	-8.52051e-11
GSE8965_SA_tp4			GEO	cDNA	1		0.18673	1.50343	-5.58375e-11
E-MEXP-1177_mucus			ArrayExpress	affymetrix	1		0.251655	1.76021e-11	-6.3952e-11
GSE4569_1h_UV			GEO	cDNA	1		0.0838538	1.84658	-1.39176e-10
E-TABM-103_t5.1			ArrayExpress	affymetrix	1		0.574387	-2.95363e-11	4.02742
GSE7573_wt_MOPS_DeaNO_5min			GEO	cDNA	1		1.01059	1.07414e-12	-6.68776e-12
GSE6992_soxR_paraquat_t4			GEO	affymetrix	1		0.154205	13.8285	5.02207e-12
GSE6781_pGIT1			GEO	cDNA	1		0.422387	-1.70247e-10	-1.52012e-09
GSE3123_rne_pNRNE5			GEO	cDNA	1		0.196808	3.76898e-11	1.17337e-10
GSE7265_WT_tp15			GEO	cDNA	1		0.105819	-3.05941e-11	-1.23732e-10
E-MEXP-584_pat1			ArrayExpress	affymetrix	1		0.651616	2.39181	-3.3837e-10
GSE6425_MG1655_anaerobic_4.5			GEO	affymetrix	0		0.23078	-8.29127e-11	-1.21984e-11
GSE6425_MG1655_aerobic_5			GEO	affymetrix	1		0.146784	-8.00398e-13	3.02051e-11
GSE8540_dpp_GSNO100_5min			GEO	cDNA	1		0.913045	3.15187e-11	-7.19687e-11
GSE6781_pGIT1_NO2			GEO	cDNA	1		0.202049	1.11776e-11	4.77839e-11
GSE7265_WT_tp5			GEO	cDNA	1		0.343361	9.46143	-3.36081e-12
E-MEXP-732_p5_g21			ArrayExpress	affymetrix	1		0.580628	5.03612	9.1521e-11
GSE6425_UTI89_aerobic_12			GEO	affymetrix	1		0.121848	-4.31064e-11	-5.12938e-12
GSE3665_wt			GEO	affymetrix	1		0.91213	-1.98968e-12	-5.49198e-13
GSE7573_MOPS_SeOh_5min			GEO	cDNA	1		0.802958	1.50939e-11	-5.94763e-11
E-MEXP-1166_DHAdp_glu1000g			ArrayExpress	cDNA	1		0.622596	5.11435	-4.84698e-12
GSE4394_eno			GEO	cDNA	1		0.97354	1.37865e-10	6.42861e-11
GSE7573_wt_MOPS_methionine_DeaNO_5min			GEO	cDNA	1		1.00358	9.24156e-12	3.45632e-11
GSE6992_wt_paraquat_t10			GEO	affymetrix	1		0.457117	5.84384e-11	-4.31734e-11
GSE6425_UTI89_aerobic_8			GEO	affymetrix	1		0.155298	-3.651e-11	1.12889e-10
GSE6425_MG1655_anaerobic_6.75			GEO	affymetrix	0		0.112284	-6.57864e-11	-1.41138e-10
GSE7573_argR_MOPS_DeaNO_5min			GEO	cDNA	1		0.0586443	12.9556	4.81451e-12
GSE4394_RNaseE_N_rif_1.5min			GEO	cDNA	1		0.969005	-6.53994e-12	6.63083e-12
GSE9_UV_20			GEO	cDNA	1		0.464872	-4.11736e-11	-2.35891e-10
GSE6712_benzalkonium_chloride			GEO	p33	1		0.347348	1.18103	-5.47861e-10
E-MEXP-732_empty			ArrayExpress	affymetrix	1		1.01025	-6.67609e-12	-2.34386e-12
GSE8965_SA_tp3			GEO	cDNA	1		0.843994	9.14103e-12	-1.10669e-11
E-TABM-103_t7.8			ArrayExpress	affymetrix	1		0.475085	-1.01868e-11	1.44711e-11
GSE7398_fis_150			GEO	affymetrix	1		0.144054	1.54774e-10	2.91803
GSE4394_wt_rif_4.5min			GEO	cDNA	1		0.857617	-5.14326e-12	4.20062e-12
GSE7265_WT_tp1			GEO	cDNA	1		0.992564	7.7019e-12	1.49405e-11
GSE6425_UTI89_anaerobic_3.5			GEO	affymetrix	0		0.255843	2.86477e-10	-5.79343e-10
GSE6712_benzalkonium_chloride+50ppm			GEO	p33	1		0.521788	3.19931	-1.81717e-10
GSE4394_RNaseE_N_rif_6min			GEO	cDNA	1		0.905041	2.20636e-11	-1.1469e-11
GSE6923_BW25113_wt_R1drd19_15_LB			GEO	affymetrix	1		0.980212	-6.28108e-11	1.31674e-11
GSE4778_t0_ph7.6			GEO	affymetrix	1		0.861504	6.22781e-11	5.03093e-11
GSE7243_phoU			GEO	affymetrix	1		0.825527	3.24898e-11	9.09202e-12
GSE8540_metJ_GSNO500_5min			GEO	cDNA	1		1.00738	-4.68122e-11	6.96088e-12
GSE3123_rne_pRNG3			GEO	cDNA	1		0.271297	-4.54452e-11	9.03263
GSE7_15min			GEO	cDNA	1		0.240699	5.17323	4.49747e-10
GSE8965_SA_tp2			GEO	cDNA	1		0.812876	0.606705	6.52615e-12
GSE4556_ph7.0			GEO	affymetrix	1		0.760413	4.23352	1.20381e-10
GSE6609_D3_aerobic			GEO	cDNA	1		0.312794	3.43573e-10	6.02554e-10
GSE6992_wt_paraquat_t8			GEO	affymetrix	1		0.561755	4.89711	1.02963e-11
GSE4569_50h_UV			GEO	cDNA	1		0.172928	1.96653e-11	9.38004e-11
E-MEXP-926_urine_biofilm_VR50			ArrayExpress	affymetrix	1		0.177308	4.38382e-11	1.82648e-12
GSE6925_ymgB_biofilm			GEO	affymetrix	1		0.481385	8.57223	4.02085e-10
GSE6712_benzalkonium_chloride			GEO	p33	1		0.45152	0.881779	2.26792e-10
GSE6444_hfq_rpoEinduced_IPTG			GEO	cDNA	1		0.564931	-4.94371e-12	6.20035e-12
GSE7265_WT_tp12			GEO	cDNA	1		0.2999	12.2159	-9.68238e-11
E-MEXP-953_T10_MG1655_Exponiential_planktonic_F_lambda_ilvG_rfb_50_rph_1			ArrayExpress	affymetrix	1		0	0	0
GSE6425_MG1655_aerobic_26			GEO	affymetrix	1		0.121891	-2.52211e-11	1.26176e-10
GSE4394_pnp_rif_4.5min			GEO	cDNA	1		0.920066	-7.44421e-11	3.15258e-12
GSE6444_hfq			GEO	cDNA	1		0.800855	3.02398	-7.96036e-11
GSE3665_mut1_0g/l_etOH			GEO	affymetrix	1		0.343835	1.46135e-10	-3.77358e-10
GSE7398_wt_240			GEO	affymetrix	1		0.89946	-9.86536e-11	-3.528e-10
E-MEXP-926_urine_83972			ArrayExpress	affymetrix	1		0.421914	1.21937	-7.44331e-11
E-MEXP-926_urine_biofilm_VR50			ArrayExpress	affymetrix	1		0.160578	-7.88975e-12	-1.93609e-11
GSE5098_aeroob_NOC5/7			GEO	cDNA	1		0.618888	3.24119e-11	2.72787e-10
GSE7573_MOPS_SeOh_5min			GEO	cDNA	1		0.989781	-1.47613e-12	1.74672e-12
GSE8540_wt_GSNO100_5min			GEO	cDNA	1		0.529202	1.41536e-12	0.195215
GSE7_tnaA2_trpR2_50ug/ml			GEO	cDNA	1		0.233748	-6.25739e-10	-2.68817e-10
GSE6426_UTI89			GEO	affymetrix	1		0	0	0
E-MEXP-953_T48_MG1655+pBR322_Biofilm_biofilm_F_lambda_ilvG_rfb_50_rph_1			ArrayExpress	affymetrix	1		0	0	0
GSE4394_rhlB_rif_6min			GEO	cDNA	1		0.788582	1.098e-10	3.36342e-10
GSE9755_0perc_tannine			GEO	affymetrix	1		0.250065	10.075	-1.9063e-11
GSE3665_wt_20g/l_etOH			GEO	affymetrix	1		0.373812	3.11792e-11	3.81945e-11
GSE6712_benzalkonium_chloride+50ppm			GEO	p33	1		0.481339	5.65881	-1.15129e-10
E-TABM-103_t5.1			ArrayExpress	affymetrix	1		0.678051	1.76592e-10	-3.53433e-09
E-MEXP-1001_art_mating_F_phenocopy			ArrayExpress	affymetrix	1		0.192229	3.71596e-11	4.55402e-11
GSE5904_ycfR_15hr_biofilm			GEO	affymetrix	1		0.899701	1.44583e-11	-3.91325e-12
GSE4394_wt_rif_3min			GEO	cDNA	1		0.806863	8.12573e-11	-9.88189e-11
GSE7265_WT_tp8			GEO	cDNA	1		0.730384	4.00298	-1.76266e-12
GSE8965_SA_tp1			GEO	cDNA	1		0	0	0
GSE6425_MG1655_anaerobic_3			GEO	affymetrix	0		0.189034	8.83345e-11	4.41262e-11
GSE4394_RNaseE_N_rif_3min			GEO	cDNA	1		0.933714	-3.01952e-11	-2.4563e-12
GSE8965_FA_tp2			GEO	cDNA	1		0.485803	1.88289e-11	0.0957509
E-MEXP-584_MOPS			ArrayExpress	affymetrix	1		1.01065	-3.8978e-11	-9.74001e-12
GSE4394_wt_rif_1.5min			GEO	cDNA	1		0.992591	1.55965e-12	5.36928e-11
GSE4383_rraA_OD:0.5			GEO	cDNA	1		0.46956	-2.23309e-10	1.56942e-10
GSE6609_D1_aerobic			GEO	cDNA	1		0.271979	4.09435e-12	-7.38799e-11
GSE7265_WT_tp13			GEO	cDNA	1		1.00318	3.44665e-11	-3.0134e-11
GSE1154_MG1655_F_plasmid			GEO	affymetrix	1		0.308762	1.15154e-11	0.99793
GSE4394_wt_rif_1.5min			GEO	cDNA	1		0.894523	0.379688	1.37339e-11
GSE5098_anaeroob_NOC5/7			GEO	cDNA	0		0.910273	9.73992e-12	-9.24872e-12
E-MEXP-1370_relA_spoT_ILE_40m			ArrayExpress	affymetrix	1		0.274364	-1.7205e-11	-7.19589e-11
E-MEXP-1370_relA_ILE_40m			ArrayExpress	affymetrix	1		0.290504	-3.13453e-11	2.10947e-11
E-MEXP-1370_wt_ILE_40m			ArrayExpress	affymetrix	1		0.666713	-4.21736e-11	1.34693e-10
E-MEXP-1370_relA_spoT_ILE_40m			ArrayExpress	affymetrix	1		0.0919033	6.63673e-11	-8.64077e-11
E-MEXP-1370_relA_ILE_40m			ArrayExpress	affymetrix	1		0.470645	-4.05821e-10	-5.02652e-10
E-MEXP-1370_wt_ILE_40m			ArrayExpress	affymetrix	1		0.599664	0.24423	4.42773e-11
GSE7265_RpoS_tp1			GEO	cDNA	1		0.734405	6.15632e-12	-2.41962e-11
GSE7265_RpoS_tp1			GEO	cDNA	1		0.959143	-1.15545e-11	6.91981e-12
GSE7265_RpoS_tp1			GEO	cDNA	1		0.77709	1.23456e-11	3.29184e-11
GSE7265_RpoS_tp2			GEO	cDNA	1		0.980277	1.54199e-11	4.85978e-12
GSE7265_RpoS_tp2			GEO	cDNA	1		0.837512	1.88492e-11	9.00218e-12
GSE7265_RpoS_tp2			GEO	cDNA	1		0.997692	-2.96698e-12	8.80803e-13
GSE7265_RpoS_tp3			GEO	cDNA	1		0.328152	-8.59404e-12	5.02697
GSE7265_RpoS_tp3			GEO	cDNA	1		0.302982	1.44676e-10	2.35263
GSE7265_RpoS_tp3			GEO	cDNA	1		0.269702	-1.03239e-10	6.24651
GSE7265_RpoS_tp4			GEO	cDNA	1		0.894594	-2.20428e-12	3.07413e-11
GSE7265_RpoS_tp4			GEO	cDNA	1		0.808174	4.69538e-12	-5.32853e-12
GSE7265_RpoS_tp4			GEO	cDNA	1		0.450972	1.45394e-11	1.18721e-10
GSE7265_RpoS_tp5			GEO	cDNA	1		0.754973	2.97352	-1.69228e-11
GSE7265_RpoS_tp5			GEO	cDNA	1		0.795428	2.50107	3.97311e-12
GSE7265_RpoS_tp5			GEO	cDNA	1		0.491325	5.25558	1.30276e-11
GSE7265_RpoS_tp6			GEO	cDNA	1		0.961954	5.11243e-12	-2.89706e-12
GSE7265_RpoS_tp6			GEO	cDNA	1		0.953207	8.24376e-12	-4.48882e-12
GSE7265_RpoS_tp7			GEO	cDNA	1		0.997902	3.1504e-10	3.91317e-11
GSE7265_RpoS_tp6			GEO	cDNA	1		0.933517	6.92469e-11	-2.92489e-11
GSE7265_RpoS_tp7			GEO	cDNA	1		0.428786	2.64556e-10	2.85075e-10
GSE7265_RpoS_tp7			GEO	cDNA	1		0.661115	-8.24574e-11	2.74434e-10
GSE7265_RpoS_tp8			GEO	cDNA	1		0.73532	4.20692	0.297457
GSE7265_RpoS_tp8			GEO	cDNA	1		0.881346	1.91769	-2.83271e-12
GSE7265_RpoS_tp8			GEO	cDNA	1		0.809158	3.10888	2.32583e-12
GSE7265_RpoS_tp9			GEO	cDNA	1		0.503427	3.2331	1.58454e-11
GSE7265_RpoS_tp9			GEO	cDNA	1		0.396868	-4.15351e-11	-4.81317e-11
GSE7265_RpoS_tp9			GEO	cDNA	1		0.467232	5.44561	2.0807e-11
GSE7265_RpoS_tp10			GEO	cDNA	1		0.518562	4.53525	-4.729e-11
GSE7265_RpoS_tp10			GEO	cDNA	1		0.467237	8.04454	-7.03718e-13
GSE7265_RpoS_tp10			GEO	cDNA	1		0.441898	7.13492	2.177e-11
GSE7265_RpoS_tp11			GEO	cDNA	1		0.409938	2.82077	0.0676001
GSE7265_RpoS_tp11			GEO	cDNA	1		0.389062	-3.75552e-11	0.966761
GSE7265_RpoS_tp11			GEO	cDNA	1		0.404597	4.03611	-6.09371e-10
GSE7265_RpoS_tp12			GEO	cDNA	1		0.390581	-2.56578e-11	-1.60085e-10
GSE7265_RpoS_tp12			GEO	cDNA	1		0.293545	-4.47094e-12	2.09667e-11
GSE7265_RpoS_tp12			GEO	cDNA	1		0.482486	0.718666	-5.70532e-10
GSE7265_RpoS_tp13			GEO	cDNA	1		0.419836	1.78356	8.65883e-11
GSE7265_RpoS_tp13			GEO	cDNA	1		0.337889	-1.14353e-10	-1.0876e-10
GSE7265_RpoS_tp13			GEO	cDNA	1		0.281424	-2.24995e-11	2.87157e-11
GSE7265_Crp_tp2			GEO	cDNA	1		0.241025	6.75081	-5.8704e-10
GSE7265_Crp_tp2			GEO	cDNA	1		0.670833	-1.26905e-10	2.88821e-10
GSE7265_Crp_tp2			GEO	cDNA	1		0.60787	3.16316	1.17139
GSE7265_Crp_tp2			GEO	cDNA	1		0.372567	9.67989	3.02714e-09
GSE7265_Crp_tp5			GEO	cDNA	1		0.592546	5.88817	7.22158e-13
GSE7265_Crp_tp5			GEO	cDNA	1		0.917736	0.34215	-1.53749e-11
GSE7265_Crp_tp5			GEO	cDNA	1		0.938971	1.26497e-12	4.10215e-12
GSE7265_Crp_tp5			GEO	cDNA	1		0.652228	-1.19582e-10	-2.94307e-11
GSE7265_Crp_tp6			GEO	cDNA	1		0.435556	8.60415	3.77018e-12
GSE7265_Crp_tp6			GEO	cDNA	1		0.468053	7.69911	3.77812e-12
GSE7265_Crp_tp6			GEO	cDNA	1		0.39163	9.41197	-4.40797e-13
GSE7265_Crp_tp6			GEO	cDNA	1		0.79787	2.27798	1.3946e-11
GSE7265_Crp_tp7			GEO	cDNA	1		0.933355	-9.22999e-13	-5.25266e-12
GSE7265_Crp_tp7			GEO	cDNA	1		0.814226	-1.64426e-11	2.3345e-13
GSE7265_Crp_tp7			GEO	cDNA	1		0.645281	4.95838	4.31118e-12
GSE7265_Crp_tp7			GEO	cDNA	1		0.399733	9.15043	-1.87123e-11
GSE7265_RelA_tp1			GEO	cDNA	1		0.269929	7.72493	3.82341
GSE7265_RelA_tp1			GEO	cDNA	1		0.480141	7.11838	1.32487
GSE7265_RelA_tp1			GEO	cDNA	1		0.406158	7.08568	2.43164
GSE7265_RelA_tp2			GEO	cDNA	1		0.923449	2.12156e-10	-1.90982e-10
GSE7265_RelA_tp2			GEO	cDNA	1		0.976937	0.35386	-1.30731e-11
GSE7265_RelA_tp2			GEO	cDNA	1		0.922834	4.50497e-11	3.80143e-11
GSE7265_RelA_tp4			GEO	cDNA	1		0.530646	7.37448	7.15381e-11
GSE7265_RelA_tp4			GEO	cDNA	1		0.314414	9.44057	1.20448e-11
GSE7265_RelA_tp4			GEO	cDNA	1		0.439301	9.72595	-1.11055e-11
GSE7265_RelA_tp5			GEO	cDNA	1		0.468506	8.17749	1.13125e-11
GSE7265_RelA_tp5			GEO	cDNA	1		0.36951	7.6323	3.91896
GSE7265_RelA_tp5			GEO	cDNA	1		0.550707	7.0094	-2.86954e-11
GSE7265_RelA_tp6			GEO	cDNA	1		0.525897	7.94435	-4.81118e-11
GSE7265_RelA_tp6			GEO	cDNA	1		0.380574	6.33249	4.11514
GSE7265_RelA_tp6			GEO	cDNA	1		0.992077	-2.94775e-12	-1.14604e-11
GSE7265_RelA_tp7			GEO	cDNA	1		0.216805	10.3872	2.27693
GSE7265_RelA_tp7			GEO	cDNA	1		0.223137	10.9668	2.37114e-11
GSE7265_RelA_tp7			GEO	cDNA	1		0.378768	9.37944	6.9961e-12
GSE7265_RelA_tp8			GEO	cDNA	1		0.222879	7.21317	1.17877e-11
GSE7265_RelA_tp8			GEO	cDNA	1		0.293644	7.10487	-1.48881e-13
GSE7265_RelA_tp8			GEO	cDNA	1		0.273272	7.66174	2.4124
GSE7265_RelA_tp9			GEO	cDNA	1		0.313757	5.75164	1.27842
GSE7265_RelA_tp9			GEO	cDNA	1		0.357062	6.70814	2.99023
GSE7265_RelA_tp10			GEO	cDNA	1		0.195114	2.40714	1.90367e-11
GSE7265_RelA_tp9			GEO	cDNA	1		0.192621	6.35105	5.371
GSE7265_RelA_tp10			GEO	cDNA	1		0.179631	2.27336	-6.09576e-10
GSE7265_RelA_tp10			GEO	cDNA	1		0.223081	-1.17902e-11	1.45641e-09
GSE7265_RelA_tp11			GEO	cDNA	1		0.184582	6.4917	6.10906
GSE7265_RelA_tp11			GEO	cDNA	1		0.375766	3.54072	-2.6371e-10
GSE7265_RelA_tp11			GEO	cDNA	1		0.177512	9.03967	3.06634
GSE11087_crp_ile_starvation			GEO	affymetrix	1		0.244712	-8.57909e-11	2.97326e-10
GSE11087_crp_ile_starvation			GEO	affymetrix	1		0.341626	7.32919e-12	2.39906e-11
GSE11087_dksA_ile_starvation			GEO	affymetrix	1		0.534109	0.0407338	7.69832e-11
GSE11087_dksA_ile_starvation			GEO	affymetrix	1		0.819729	-2.91095e-11	-8.10339e-13
GSE11087_lrp_ile_starvation			GEO	affymetrix	1		0.469272	9.44436e-11	1.05833e-11
GSE11087_lrp_ile_starvation			GEO	affymetrix	1		0.652183	1.74068e-11	-1.32666e-11
GSE11087_rpoS_ile_starvation			GEO	affymetrix	1		0.293066	5.09844e-11	1.5828e-10
GSE11087_rpoS_ile_starvation			GEO	affymetrix	1		0.828408	-5.34568e-10	-5.20111e-10
GSE11087_wt_iso			GEO	affymetrix	1		0.805556	3.76769e-11	-9.80047e-11
GSE11087_ile_starvation_T340m			GEO	affymetrix	1		0.895587	6.9968e-11	8.13695e-11
GSE11087_ile_starvation_T370m			GEO	affymetrix	1		0.914661	-7.2465e-11	-7.99154e-12
GSE11087_ile_starvation_T380m			GEO	affymetrix	1		0.854256	-1.55578e-11	3.34757e-11
GSE11087_ile_starvation_T390m			GEO	affymetrix	1		0.874676	-5.48594e-11	-4.94594e-11
GSE11087_ile_starvation_T395m			GEO	affymetrix	1		0.455131	-1.0408e-10	-1.14362e-10
GSE11087_ile_starvation_T400m			GEO	affymetrix	1		0.701522	-9.27508e-12	-8.47746e-13
GSE11087_ile_starvation_T410m			GEO	affymetrix	1		0.463696	-1.35503e-10	1.2609e-10
GSE11087_ile_starvation_T420m			GEO	affymetrix	1		0.566172	-4.37446e-11	-6.22529e-11
GSE11087_ile_starvation_T430m			GEO	affymetrix	1		0.541381	-7.7146e-11	1.20646e-10
GSE11087_ile_starvation_T445m			GEO	affymetrix	1		0.507394	-3.98038e-11	-1.1054e-11
GSE11087_ile_starvation_T460m			GEO	affymetrix	1		0.409957	1.87794e-10	8.45134e-11
GSE11087_ile_starvation_T493m			GEO	affymetrix	1		0.535581	-9.78796e-11	-1.0873e-10
GSE12750_5FU			GEO	affymetrix	1		0.347741	11.388	-4.10936e-11
GSE12750			GEO	affymetrix	1		0.419828	9.74417	-4.17285e-11
GSE12750_5FU			GEO	affymetrix	1		0.383822	7.30052	-4.0058e-11
GSE18362_biofilm			GEO	p33	1		0.671228	-2.09729e-11	7.37283e-11
GSE18362_biofilm			GEO	p33	1		0.699661	1.65506e-10	-8.01717e-10
GSE14796_WT_infusion			GEO	affymetrix	1		0.576871	7.01111e-11	7.74132e-11
GSE14796_WT_infusion_sucrose_MgSO4			GEO	affymetrix	1		1.01064	-1.12599e-11	2.42346e-11
GSE14796_WT_infusion_sucrose_MgSO4			GEO	affymetrix	1		0.804399	-2.04624e-11	-9.85809e-12
GSE14796_WT_infusion_sucrose_MgSO4			GEO	affymetrix	1		0.744602	-3.91417e-13	-1.76435e-09
GSE14796_Lform_infusion_sucrose_MgSO4_PenG			GEO	affymetrix	1		0.334365	11.1005	-3.09513e-11
GSE14796_Lform_infusion_sucrose_MgSO4_PenG			GEO	affymetrix	1		0.357358	10.3469	4.58752e-11
GSE14796_Lform_infusion_sucrose_MgSO4_PenG			GEO	affymetrix	1		0.37599	10.3373	-6.16459e-11
GSE15050_qseF_DMEM_None			GEO	affymetrix	1		0.533106	-1.17574e-10	-9.33991e-11
GSE15050_wt_DMEM_AI3			GEO	affymetrix	1		0.563978	-1.99217e-11	2.87533
GSE15050_wt_DMEM_EPI			GEO	affymetrix	1		0.22052	10.3903	5.38481e-11
GSE15050_kdpE_DMEM_None			GEO	affymetrix	1		0	0	0
GSE15050_wt_LB_None			GEO	affymetrix	1		0.345761	4.09888e-10	-1.42345e-09
GSE15050_qseB_DMEM_None			GEO	affymetrix	1		0.321533	-7.97965e-12	3.44322
GSE15050_qseC_DMEM_None			GEO	affymetrix	1		0.420171	-2.30331e-11	1.36418
GSE15050_qseC_DMEM_AI3			GEO	affymetrix	1		0.330461	-5.2995e-11	-7.69095e-11
GSE15050_qseC_DMEM_EPI			GEO	affymetrix	1		0.418541	-3.69734e-11	2.96027e-10
GSE15050_qseC_LB_None			GEO	affymetrix	1		0.170409	-8.82887e-11	-2.86073e-09
GSE13048_CO-RM_anaer			GEO	cDNA	0		0.147422	-2.24436e-10	-2.01976e-10
GSE13048_CO-RM_anaer			GEO	cDNA	0		0.495428	5.74501	2.35881
GSE21839_WT			GEO	affymetrix	1		1.01059	-3.33951e-10	-1.01062e-10
GSE21839_WT			GEO	affymetrix	1		1.01014	1.47141e-10	4.49873e-11
GSE21839_WT_-O2			GEO	affymetrix	0		0.581471	2.22614	1.15594e-10
GSE21839_WT_-O2			GEO	affymetrix	0		0.799305	-1.05921e-10	-1.43374e-11
GSE21839_WT_-O2			GEO	affymetrix	0		0.52516	3.86465	8.76127e-11
GSE21839_E4			GEO	affymetrix	1		0.880695	0.300987	-1.35861e-11
GSE21839_E4			GEO	affymetrix	1		0.820582	0.91264	-4.60944e-11
GSE21839_E4			GEO	affymetrix	1		0.615009	3.90675	-8.76462e-13
GSE21839_E4_-O2			GEO	affymetrix	0		0.713283	-1.10229e-11	-3.8736e-11
GSE21839_E4_-O2			GEO	affymetrix	0		0.742167	-3.90889e-10	2.88798e-11
GSE21839_E4_-O2			GEO	affymetrix	0		0.523067	2.55602	3.28911e-10
GSE15500			GEO	affymetrix	1		0.322092	6.41181	2.01445e-11
GSE15500			GEO	affymetrix	1		0.253979	7.48708	6.58766e-12
GSE15500			GEO	affymetrix	1		0.450988	5.15657	-2.71651e-12
GSE15500			GEO	affymetrix	1		0.27111	12.0078	-1.77745e-10
GSE15500			GEO	affymetrix	1		0.288787	11.302	-9.99211e-11
GSE15500			GEO	affymetrix	1		0.223826	12.9715	2.42449e-11
GSE15500			GEO	affymetrix	1		0.315401	1.25872	-1.3286e-11
GSE15500			GEO	affymetrix	1		0.335596	0.691272	3.12022e-12
GSE15500			GEO	affymetrix	1		0.281093	1.92012	4.49856e-10
GSE15500			GEO	affymetrix	1		0.996636	-1.91545e-11	3.22483e-11
GSE15500			GEO	affymetrix	1		1.00138	-6.60425e-11	-1.04705e-11
GSE12797_Statio WT			GEO	affymetrix	1		0.295213	2.3146e-11	5.92296e-12
GSE12797_Statio WT			GEO	affymetrix	1		0.235867	-3.00222e-11	-5.8845e-12
GSE12797_Expon rpoS			GEO	affymetrix	1		0.245127	3.34537e-10	-3.37981e-11
GSE12797_Expon rpoS			GEO	affymetrix	1		0.34554	-4.069e-11	3.99225e-11
GSE12797_Expon rpoS			GEO	affymetrix	1		0.384732	4.64543e-11	2.64119e-11
GSE12797_Stat rpoS			GEO	affymetrix	1		0.236033	2.65049e-11	8.28692e-11
GSE12797_Stat rpoS			GEO	affymetrix	1		0.275362	-6.10686e-11	-1.39494e-11
GSE12797_Stat rpoS			GEO	affymetrix	1		0.248704	1.01084e-10	1.19115e-10
GSE12797_Expon WT			GEO	affymetrix	1		0.5046	8.71439	6.1874e-12
GSE12797_Expon WT			GEO	affymetrix	1		0.691214	3.67591e-11	-2.61518e-10
GSE12797_Statio WT			GEO	affymetrix	1		0.303435	-1.26696e-11	1.14221e-10
GSE13048_CO-RM_anaer			GEO	cDNA	0		0.101909	-1.29162e-09	-1.67698e-08
GSE13048_CO-RM_anaer			GEO	cDNA	0		0.485211	1.86152e-10	-3.12308e-11
GSE13048_CO-RM_anaer			GEO	cDNA	0		0.789172	1.79842e-10	-8.93434e-10
GSE13048_CO-RM_anaer			GEO	cDNA	0		0.384613	-1.1808e-10	-2.28358e-10
GSE13048_CO-RM_anaer			GEO	cDNA	0		0.838827	-4.7036e-12	-1.0633e-11
GSE13048_CO-RM_anaer			GEO	cDNA	0		0.332288	7.47498	8.04962e-10
GSE10158_untreated_0min_rep2			GEO	affymetrix	1		0.959427	-8.24013e-12	-2.85006e-11
GSE10158_untreated_0min_rep3			GEO	affymetrix	1		0.550607	1.13101e-10	6.44197e-11
GSE10158_untreated_10min_rep1			GEO	affymetrix	1		0.608276	2.40912e-11	1.3043e-11
GSE10158_untreated_10min_rep2			GEO	affymetrix	1		0.435408	1.15975e-10	-1.6399e-10
GSE10158_untreated_25min_rep1			GEO	affymetrix	1		0.70441	8.27856e-12	-1.9436e-11
GSE10158_untreated_25min_rep2			GEO	affymetrix	1		0.26109	-1.61912e-10	6.15823
GSE10158_untreated_25min_rep3			GEO	affymetrix	1		0.483202	1.09641e-10	-1.5311e-10
GSE10158_untreated_45min_rep1			GEO	affymetrix	1		0.361497	-1.71328e-10	2.22504
GSE10158_untreated_45min_rep2			GEO	affymetrix	1		0.634221	-1.44968e-10	2.89976
GSE10158_untreated_45min_rep3			GEO	affymetrix	1		0.226077	1.70816e-10	4.55854e-10
GSE10158_untreated_45min_rep4_1			GEO	affymetrix	1		0.6374	2.55033	-1.04441e-10
GSE10158_cefsulodin10_0min_rep1			GEO	affymetrix	1		0.47915	6.50936e-11	-2.19927e-11
GSE10158_cefsulodin10_0min_rep2			GEO	affymetrix	1		0.858915	2.00681e-10	0.385291
GSE10158_cefsulodin10_10min_rep1			GEO	affymetrix	1		0.324624	-4.13426e-12	-1.69731e-10
GSE10158_cefsulodin10_10min_rep2			GEO	affymetrix	1		0.747252	-4.62769e-10	2.68244
GSE10158_cefsulodin10_25min_rep1			GEO	affymetrix	1		0.28083	2.42126e-10	1.09424
GSE10158_cefsulodin10_25min_rep2			GEO	affymetrix	1		0.273431	2.66624e-10	1.89336
GSE10158_cefsulodin10_45min_rep1			GEO	affymetrix	1		0	0	0
GSE10158_cefsulodin10_45min_rep2			GEO	affymetrix	1		0.612811	-1.2257e-10	9.98686e-11
GSE10158_cefsulodin10_45min_rep3			GEO	affymetrix	1		0.52396	-1.05794e-10	6.34352e-10
GSE10158_mecillinam0.03_0min_rep1			GEO	affymetrix	1		0.353295	4.58832e-12	2.70246e-11
GSE10158_mecillinam0.03_0min_rep2			GEO	affymetrix	1		0.943268	1.03994e-10	-2.1941e-10
GSE10158_mecillinam0.03_10min_rep1			GEO	affymetrix	1		0.436411	1.25967e-11	2.2819e-11
GSE10158_mecillinam0.03_10min_rep2			GEO	affymetrix	1		0.54077	-4.6356e-12	-3.90198e-11
GSE10158_mecillinam0.03_25min_rep1			GEO	affymetrix	1		0.403153	-1.56e-11	-7.43398e-11
GSE10158_mecillinam0.03_25min_rep2			GEO	affymetrix	1		0.282195	1.21875e-10	2.92586
GSE10158_mecillinam0.03_45min_rep1			GEO	affymetrix	1		0	0	0
GSE10158_mecillinam0.03_45min_rep2			GEO	affymetrix	1		0.797139	7.29854e-11	-1.101e-10
GSE10158_mecillinam0.03_45min_rep3			GEO	affymetrix	1		0.210956	-5.44362e-11	1.75689
GSE10158_cefmec10_0min_rep1			GEO	affymetrix	1		0.914305	-5.60382e-11	-8.20436e-11
GSE10158_cefmec10_0min_rep2			GEO	affymetrix	1		0.622718	2.14159e-10	-9.62834e-12
GSE10158_cefmec10_0min_rep3			GEO	affymetrix	1		0.931309	3.1574e-12	-7.35675e-11
GSE10158_cefmec10_10min_rep1			GEO	affymetrix	1		0.881569	0.531979	-2.33809e-10
GSE10158_cefmec10_10min_rep2			GEO	affymetrix	1		0.773553	7.14777e-11	-4.59036e-11
GSE10158_cefmec10_10min_rep3			GEO	affymetrix	1		0.680348	-6.5085e-13	1.83282e-11
GSE10158_cefmec10_25min_rep1			GEO	affymetrix	1		0.646332	1.05358	2.12222e-10
GSE10158_cefmec10_25min_rep2			GEO	affymetrix	1		0.338896	-3.06624e-12	2.76517
GSE10158_cefmec10_25min_rep3			GEO	affymetrix	1		0.431656	-9.84722e-12	1.78275e-10
GSE10158_cefmec10_45min_rep1			GEO	affymetrix	1		0.584568	1.51474e-11	5.77276e-12
GSE10158_cefmec10_45min_rep2			GEO	affymetrix	1		0.614798	5.48748	1.23029e-11
GSE10158_cefmec10_45min_rep3			GEO	affymetrix	1		0.389768	3.18167e-11	-4.38865e-10
GSE10158_cefmec10_45min_rep4_1			GEO	affymetrix	1		0.482724	-1.23141e-10	5.31561e-11
GSE34275			GEO	affymetrix	1		1.01054	-1.95018e-11	-7.82103e-12
GSE34275			GEO	affymetrix	1		1.01054	-1.68621e-10	-4.13472e-12
GSE34275			GEO	affymetrix	1		0.971171	9.63057e-12	2.114e-12
GSE34275			GEO	affymetrix	1		0.962516	-1.43992e-11	1.91195e-11
GSE34275			GEO	affymetrix	1		0.965758	5.72943e-11	-3.52301e-11
GSE34275			GEO	affymetrix	1		0.358221	9.99576	1.23147e-10
GSE34275			GEO	affymetrix	1		0.419919	9.22055	-2.65925e-10
GSE34275			GEO	affymetrix	1		0.698385	4.44843	5.14834e-12
GSE34275			GEO	affymetrix	1		0.889491	-4.41173e-11	-2.86189e-11
GSE34275			GEO	affymetrix	1		0.52814	-7.55195e-11	1.85431e-10
GSE34275			GEO	affymetrix	1		0.745649	4.68181e-11	-1.89222e-09
GSE28795_pGB2_ppGpp0			GEO	affymetrix	1		1.00976	-4.18337e-12	-4.80284e-12
GSE28795_pA_ppGpp0			GEO	affymetrix	1		1.00316	1.48118e-13	8.62207e-12
GSE28795_pA_ppGpp0			GEO	affymetrix	1		0.993925	2.72076e-11	4.092e-12
GSE28795_pB_ppGpp0			GEO	affymetrix	1		1.01055	3.38677e-13	-2.29965e-12
GSE28795_pB_ppGpp0			GEO	affymetrix	1		1.01064	7.09205e-12	-7.18682e-12
GSE28795_dskA-_pGB2_ppGpp0			GEO	affymetrix	1		0.469991	1.24166e-11	2.13011
GSE28795_dskA-_pGB2_ppGpp0			GEO	affymetrix	1		0.711568	-4.63219e-10	1.093e-09
GSE28795_dskA-_pA_ppGpp0			GEO	affymetrix	1		0.32493	6.22238	2.94503e-11
GSE28795_dskA-_pA_ppGpp0			GEO	affymetrix	1		0.461575	4.44245	-1.21564e-10
GSE28795_dskA-_pB_ppGpp0			GEO	affymetrix	1		0.337065	2.35488	-1.39639e-11
GSE28795_dskA-_pB_ppGpp0			GEO	affymetrix	1		0.367277	3.84383	-1.35304e-10
GSE15533_O157:H7_chlorine			GEO	affymetrix	1		0.60869	-1.31203e-10	-4.20113e-11
GSE15533_TW_chlorine			GEO	affymetrix	1		0.425128	5.67509	2.88107
GSE15533_O157:H7_H2O2			GEO	affymetrix	1		1.01022	2.78867e-11	1.23435e-11
GSE15533_TW_H2O2			GEO	affymetrix	1		0.981381	1.38438e-11	-7.0669e-12
GSE15533_TW			GEO	affymetrix	1		0.960839	-8.04616e-12	5.40354e-12
GSE15533_O157:H7_chlorine			GEO	affymetrix	1		0.614772	0.411849	-1.46899e-11
GSE15533_TW-chlorine			GEO	affymetrix	1		0.678991	-1.21617e-12	2.3974e-12
GSE15533_O157:H7-H2O2			GEO	affymetrix	1		0.383063	8.34444e-11	-1.56329e-10
GSE15533_TW_H2O2			GEO	affymetrix	1		0.339386	5.11812e-11	8.56968e-11
GSE15533_O157:H7			GEO	affymetrix	1		0.987867	8.85785e-11	3.47084e-11
GSE15533_TW			GEO	affymetrix	1		1.0042	5.31426e-11	2.04039e-11
GSE9923_BW25113_tnaA_biofilm_30C			GEO	affymetrix	1		0.391817	9.04741	-1.98994e-10
GSE9923_BW25113_tnaA_biofilm_indole100uM_30C			GEO	affymetrix	1		0.983859	-7.59239e-12	-7.076e-12
GSE9923_BW25113_wt_biofilm_30C			GEO	affymetrix	1		0.401925	10.0573	-3.59571e-10
GSE9923_BW25113_sdiA_planktonic_30C			GEO	affymetrix	1		0.534689	7.97824e-10	-2.61706e-10
ref_GSE9923_BW25113_luxS_planktonic_37C			GEO	affymetrix	1		0.65264	3.96662	-5.10458e-12
ref_GSE9923_BW25113_tnaA_biofilm_37C			GEO	affymetrix	1		0.22031	1.08173e-11	-5.57149e-12
GSE29486_control t1			GEO	affymetrix	1		0.533514	9.18392e-11	1.00958e-09
GSE29486_control t2			GEO	affymetrix	1		0.700581	3.21536e-11	1.64266
GSE29486__control t3			GEO	affymetrix	1		0.609204	6.89165	-2.85638e-11
GSE29486__control t4			GEO	affymetrix	1		0.710664	-5.33114e-11	4.41857
GSE29486__control t5			GEO	affymetrix	1		0.64573	-1.23622e-10	1.35718e-10
GSE29486_Indol t0			GEO	affymetrix	1		0.876721	2.59972e-10	2.79573e-10
GSE29486_Indol t1			GEO	affymetrix	1		0.488223	-1.52487e-10	-1.01156e-10
GSE29486_Indol t2			GEO	affymetrix	1		0.664659	-2.77693e-11	-2.52448e-10
GSE29486_Indol t3			GEO	affymetrix	1		0.503159	5.255e-10	1.19673e-10
GSE29486_Indol t4			GEO	affymetrix	1		0.652521	1.31975e-10	6.03196
GSE17519_0%Sodium benzoate_0min			GEO	affymetrix	1		0.997483	1.98991e-12	-3.13599e-12
GSE17519_0.5%Sodium benzoate_0min			GEO	affymetrix	1		0.375707	-1.44239e-11	8.88523e-11
GSE17519_0.5%Sodium benzoate_0min			GEO	affymetrix	1		0.55252	6.78885	9.78939e-13
ref_GSE17519_0%Sodium benzoate_5min			GEO	affymetrix	1		0.596063	7.03229	-8.49229e-12
ref_GSE17519_0%Sodium benzoate_15min			GEO	affymetrix	1		0.52684	6.45497	-4.28892e-13
ref_GSE17519_0%Sodium benzoate_30min			GEO	affymetrix	1		0.340224	6.45852	3.14752
ref_GSE17519_0%Sodium benzoate_60min			GEO	affymetrix	1		0.575413	3.87954	-3.1643e-10
GSE17519_0%Sodium benzoate_5min			GEO	affymetrix	1		0.703475	-3.91076e-11	1.85954e-11
GSE17519_0.5%Sodium benzoate_5min			GEO	affymetrix	1		0.589091	5.52632e-11	-4.54723e-09
GSE17519_0.5%Sodium benzoate_5min			GEO	affymetrix	1		0.953425	-2.95e-11	4.44212e-11
GSE17519_0%Sodium benzoate_15min			GEO	affymetrix	1		1.00671	5.35206e-12	-1.1795e-11
GSE17519_0.5%Sodium benzoate_15min			GEO	affymetrix	1		0.915382	-5.65334e-10	3.47177e-11
GSE17519_0.5%Sodium benzoate_15min			GEO	affymetrix	1		0.799703	2.34481	7.97138e-11
GSE17519_0%Sodium benzoate_30min			GEO	affymetrix	1		1.00636	-2.37305e-10	9.92992e-11
GSE17519_0.5%Sodium benzoate_30min			GEO	affymetrix	1		0.427822	3.1073	2.72086
GSE17519_0.5%Sodium benzoate_30min			GEO	affymetrix	1		0.43263	3.29137	2.88604
GSE17519_0%Sodium benzoate_60min			GEO	affymetrix	1		1.01033	2.99865e-10	1.66329e-11
GSE17519_0.5%Sodium benzoate_60min			GEO	affymetrix	1		0.414488	2.3703	1.05863e-10
GSE17519_0.5%Sodium benzoate_60min			GEO	affymetrix	1		0.435477	1.9028	-1.77394e-10
GSE6033_T2			GEO	cDNA	1		0.666762	-5.91582e-13	3.38315e-10
GSE6033_T1			GEO	cDNA	1		0.792274	6.62693e-10	4.51878e-10
GSE6033_T3			GEO	cDNA	1		0.932063	1.12509e-10	5.92475e-11
GSE6033_T4			GEO	cDNA	1		1.01044	-6.41704e-12	1.32582e-11
GSE6033_T5			GEO	cDNA	1		0.980224	8.59008e-12	-6.28442e-11
GSE6033_T6			GEO	cDNA	1		0.511797	-1.1973e-09	2.66546e-10
GSE6033_T7			GEO	cDNA	1		0.154406	2.05687e-12	1.07167
GSE6033_T8			GEO	cDNA	1		0.307431	-2.58223e-11	2.17801e-11
GSE6033_T9			GEO	cDNA	1		0.190189	-4.33942e-12	1.2921e-10
GSE6033_T10			GEO	cDNA	1		0.187794	-2.37146e-12	-4.51031e-11
GSE6033_T11			GEO	cDNA	1		0.178959	-1.15601e-11	7.59552e-12
GSE6033_T1			GEO	cDNA	1		0.565372	-2.22013e-11	-7.83012e-11
GSE6033_T2			GEO	cDNA	1		0.333592	-2.28267e-10	3.50626e-11
GSE6033_T3			GEO	cDNA	1		0.362534	10.3483	-4.20494e-11
GSE6033_T4			GEO	cDNA	1		0.9256	0.35848	-4.07255e-11
GSE6033_T5			GEO	cDNA	1		0.725986	9.36165e-11	1.08566e-09
GSE6033_T6			GEO	cDNA	1		0.724255	3.99915e-10	-1.31041e-10
GSE6033_T7			GEO	cDNA	1		0.474847	-1.88131e-10	5.31817e-10
GSE6033_T8			GEO	cDNA	1		0.419897	-1.28741e-11	3.65264e-12
GSE6033_T9			GEO	cDNA	1		0.228349	-4.20614e-10	1.51307e-10
GSE6033_T10			GEO	cDNA	1		0.200665	4.33852e-12	1.33808e-12
GSE6033_T11			GEO	cDNA	1		0.177626	-4.30522e-10	-3.35072e-10
GSE33147_lac2_day20_rep1			GEO	affymetrix	1		0	0	0
GSE33147_lac2_day20_rep2			GEO	affymetrix	1		0	0	0
GSE33147_lac2_day20_rep3			GEO	affymetrix	1		0.121268	-1.94428e-10	-1.76388e-10
GSE33147_lac2_day60_rep1			GEO	affymetrix	1		0	0	0
GSE33147_lac2_day60_rep2			GEO	affymetrix	1		0	0	0
GSE33147_lac2_day60_rep3			GEO	affymetrix	1		0	0	0
GSE33147_lac3_day20_rep1			GEO	affymetrix	1		0.952523	-3.97154e-10	-4.03977e-10
GSE33147_lac3_day20_rep2			GEO	affymetrix	1		0.505304	2.16609e-09	9.11475
GSE33147_lac3_day20_rep3			GEO	affymetrix	1		0.398407	4.5653e-10	8.65136e-10
GSE33147_lac3_day60_rep1			GEO	affymetrix	1		0.2185	2.09786e-12	5.28741e-12
GSE33147_lac3_day60_rep2			GEO	affymetrix	1		0	0	0
GSE33147_lac3_day60_rep3			GEO	affymetrix	1		0.310534	-6.63642e-10	-8.32383e-10
GSE33147_lacA_day20_rep1			GEO	affymetrix	1		0	0	0
GSE33147_lacA_day20_rep2			GEO	affymetrix	1		0.559749	1.15536e-10	1.04892e-10
GSE33147_lacA_day20_rep3			GEO	affymetrix	1		0.34068	1.72061e-10	-4.62243e-10
GSE33147_lacA_day60_rep1			GEO	affymetrix	1		0.977654	-1.60215e-10	-3.12045e-11
GSE33147_lacA_day60_rep2			GEO	affymetrix	1		0.985684	4.57045e-12	-4.0454e-12
GSE33147_lacA_day60_rep3			GEO	affymetrix	1		0.562403	8.13192e-10	-5.06216e-10
GSE33147_lacA_day60_rep4			GEO	affymetrix	1		0.0986005	-3.50989e-09	1.35337e-09
GSE33147_lacB_day20_rep1			GEO	affymetrix	1		0	0	0
GSE33147_lacB_day20_rep2			GEO	affymetrix	1		0	0	0
GSE33147_lacB_day20_rep3			GEO	affymetrix	1		0	0	0
GSE33147_lacB_day60_rep1			GEO	affymetrix	1		0	0	0
GSE33147_lacB_day60_rep2			GEO	affymetrix	1		0.0148485	0	-7.69736e-09
GSE33147_lacB_day60_rep3			GEO	affymetrix	1		0.63369	3.25885e-10	-2.33628e-10
GSE33147_lacC_day20_rep1			GEO	affymetrix	1		0.97515	-8.54496e-12	-5.79624e-12
GSE33147_lacC_day20_rep2			GEO	affymetrix	1		0.483861	-1.16203e-10	1.04845e-10
GSE33147_lacC_day20_rep3			GEO	affymetrix	1		0	0	0
GSE33147_lacC_day60_rep1			GEO	affymetrix	1		0.36308	-8.23848e-10	-3.33572e-10
GSE33147_lacC_day60_rep2			GEO	affymetrix	1		0.638431	-1.3646e-10	3.67526e-10
GSE33147_lacC_day60_rep3			GEO	affymetrix	1		0.809042	4.37368e-10	1.51941e-10
GSE33147_lacD_day20_rep1			GEO	affymetrix	1		0.569083	6.55808e-12	-1.38971e-11
GSE33147_lacD_day20_rep2			GEO	affymetrix	1		0.246722	9.78899e-12	2.86565e-12
GSE33147_lacD_day20_rep3			GEO	affymetrix	1		0	0	0
GSE33147_lacD_day60_rep1			GEO	affymetrix	1		0	0	0
GSE33147_lacD_day60_rep2			GEO	affymetrix	1		0	0	0
GSE33147_lacD_day60_rep3			GEO	affymetrix	1		0	0	0
GSE33147_lacE_day20_rep1			GEO	affymetrix	1		0	0	0
GSE33147_lacE_day20_rep2			GEO	affymetrix	1		0.50996	-1.86154e-11	-8.36885e-11
GSE33147_lacE_day20_rep3			GEO	affymetrix	1		0.746439	-2.04378e-10	4.02722e-11
GSE33147_lacE_day60_rep1			GEO	affymetrix	1		0	0	0
GSE33147_lacE_day60_rep2			GEO	affymetrix	1		0	0	0
GSE33147_lacE_day60_rep3			GEO	affymetrix	1		0.315808	1.88751e-10	-5.484e-11
GSE33147_wt_rep2			GEO	affymetrix	1		0.475406	8.31043e-11	-1.44909e-11
GSE33147_wt_rep3			GEO	affymetrix	1		0	0	0
GSE33147_wt_rep4			GEO	affymetrix	1		0.725911	-2.41471e-12	-1.0965e-11
GSE33147_wt_rep5			GEO	affymetrix	1		0.599073	3.0211	1.71309e-11
GSE33147_wt_rep6			GEO	affymetrix	1		0	0	0
GSE10159_untreated_10min			GEO	affymetrix	1		0.595885	5.62082	-2.0394e-10
GSE10159_untreated_10min			GEO	affymetrix	1		0.932803	-4.74579e-12	1.94495e-12
GSE10159_untreated_10min			GEO	affymetrix	1		0.967488	-1.57246e-11	8.05755e-12
GSE10159_untreated_60min			GEO	affymetrix	1		0.649548	-2.57738e-10	1.08138
GSE10159_untreated_60min			GEO	affymetrix	1		0.551999	6.82346e-12	3.99364
GSE10159_untreated_60min			GEO	affymetrix	1		0	0	0
GSE10159_untreated_40min			GEO	affymetrix	1		0.952423	3.91309e-11	-2.71979e-11
GSE10159_treated_cefsulodin60_5min			GEO	affymetrix	1		1.0055	-4.41596e-11	9.2919e-11
GSE10159_treated_cefsulodin60_5min			GEO	affymetrix	1		0.949812	-4.11998e-11	8.45324e-11
GSE10159_treated_cefsulodin60_20min			GEO	affymetrix	1		0.976379	-4.11662e-12	-3.48813e-12
GSE10159_treated_cefsulodin60_10min			GEO	affymetrix	1		0.322762	10.0735	8.82932e-12
GSE10159_treated_cefsulodin60_10min			GEO	affymetrix	1		0.933704	9.72161e-12	-4.135e-12
GSE10159_treated_cefsulodin60_10min			GEO	affymetrix	1		0.979884	-4.05201e-12	-1.10786e-11
GSE10159_treated_mecillinam0.3_60min			GEO	affymetrix	1		0.427765	-1.35725e-10	1.86412
GSE10159_treated_mecillinam0.3_60min			GEO	affymetrix	1		0	0	0
GSE10159_treated_mecillinam0.3_60min			GEO	affymetrix	1		0	0	0
GSE10159_treated_cefmec_40min			GEO	affymetrix	1		0.841157	2.18317e-11	-1.5097e-11
GSE33147_glyc1_day20_rep1			GEO	affymetrix	1		0.659144	1.77212e-10	-1.96757e-09
GSE33147_glyc1_day20_rep2			GEO	affymetrix	1		0.69576	5.10743	-9.85905e-12
GSE33147_glyc1_day20_rep3			GEO	affymetrix	1		0.988714	-2.08186e-12	-2.69041e-11
GSE33147_glyc1_day44_rep1			GEO	affymetrix	1		0.877594	0.612057	-2.04222e-10
GSE33147_glyc1_day44_rep2			GEO	affymetrix	1		0.572433	6.01168	1.326e-11
GSE33147_glyc1_day44_rep3			GEO	affymetrix	1		0.358119	10.1682	9.31644e-11
GSE33147_glyc2_day20_rep1			GEO	affymetrix	1		0.520734	6.2844	-5.90658e-12
GSE33147_glyc2_day20_rep2			GEO	affymetrix	1		0.640665	3.70693	1.48545e-10
GSE33147_glyc2_day20_rep3			GEO	affymetrix	1		0.921272	-1.47407e-11	8.72703e-12
GSE33147_glyc2_day44_rep1			GEO	affymetrix	1		0.379459	2.53995	-2.95746e-12
GSE33147_glyc2_day44_rep2			GEO	affymetrix	1		0.912034	-1.67367e-10	-3.52868e-11
GSE33147_glyc2_day44_rep3			GEO	affymetrix	1		0.872172	-2.36466e-10	1.19119e-11
GSE33147_glycA_day20_rep1			GEO	affymetrix	1		0.549845	-2.12552e-10	1.25024e-10
GSE33147_glycA_day20_rep2			GEO	affymetrix	1		0.531193	3.64588e-10	4.09685e-10
GSE33147_glycA_day20_rep3			GEO	affymetrix	1		0.529985	-1.87923e-12	-8.79555e-12
GSE33147_glycA_day44_rep1			GEO	affymetrix	1		0.654701	-3.6454e-10	2.56665e-10
GSE33147_glycA_day44_rep2			GEO	affymetrix	1		0.628316	-1.82366e-10	-1.20614e-10
GSE33147_glycA_day44_rep3			GEO	affymetrix	1		0.585301	-8.45549e-10	-3.34007e-10
GSE33147_glycB_day20_rep1			GEO	affymetrix	1		0.468222	-1.34266e-10	-1.60127e-11
GSE33147_glycB_day20_rep2			GEO	affymetrix	1		0.647886	-1.54428e-10	1.39683e-10
GSE33147_glycB_day20_rep3			GEO	affymetrix	1		0.380179	8.62749	7.52605e-12
GSE33147_glycB_day44_rep1			GEO	affymetrix	1		0.877646	0.376109	-2.07928e-11
GSE33147_glycB_day44_rep2			GEO	affymetrix	1		0.827628	8.41868e-11	-5.61875e-11
GSE33147_glycB_day44_rep3			GEO	affymetrix	1		0.921729	-8.98247e-10	3.39113e-10
GSE33147_glycC_day20_rep1			GEO	affymetrix	1		0.995251	-5.98727e-10	2.20416e-10
GSE33147_glycC_day44_rep1			GEO	affymetrix	1		0.981096	-1.99262e-10	1.00035e-10
GSE33147_glycC_day44_rep2			GEO	affymetrix	1		0	0	0
GSE33147_glycC_day44_rep3			GEO	affymetrix	1		0.450744	-4.5601e-10	4.27797e-10
GSE33147_glycD_day20_rep1			GEO	affymetrix	1		0.514827	6.93275e-11	1.40443e-10
GSE33147_glycD_day20_rep2			GEO	affymetrix	1		0.663227	-2.85203e-12	-3.54755e-12
GSE33147_glycD_day20_rep3			GEO	affymetrix	1		0.527342	5.23683e-10	-4.34458e-10
GSE33147_glycD_day44_rep1			GEO	affymetrix	1		0.543785	-2.60366e-10	1.86948e-10
GSE33147_glycD_day44_rep2			GEO	affymetrix	1		0.68964	7.17468e-11	-7.02705e-11
GSE33147_glycD_day44_rep3			GEO	affymetrix	1		0.472494	-9.69188e-11	8.20733e-11
GSE33147_glycE_day20_rep1			GEO	affymetrix	1		0.588218	8.76575e-11	-1.18404e-10
GSE33147_glycE_day20_rep2			GEO	affymetrix	1		0.686504	-2.31955e-10	9.29191e-12
GSE33147_glycE_day20_rep3			GEO	affymetrix	1		0.776209	-1.27667e-11	6.22151e-12
GSE33147_glycE_day44_rep1			GEO	affymetrix	1		0.871396	-1.92508e-10	-5.52585e-10
GSE33147_glycE_day44_rep2			GEO	affymetrix	1		0.750845	-1.93456e-10	3.89051e-10
GSE33147_glycE_day44_rep3			GEO	affymetrix	1		0.820556	-1.13031e-09	8.09218e-10
GSE33147_wt_rep2			GEO	affymetrix	1		0.995019	-1.12869e-11	-3.25425e-12
GSE33147_wt_rep3			GEO	affymetrix	1		0.990873	-9.80523e-12	-2.13108e-13
GSE33147_wt_rep4			GEO	affymetrix	1		0.455092	9.00259	1.07057e-10
GSE33147_wt_rep5			GEO	affymetrix	1		0.411135	9.85773	3.05379e-12
GSE33147_glycC_day20_rep2			GEO	affymetrix	1		0.982411	-2.76955e-10	2.12943e-10
GSE33147_glycC_day20_rep3			GEO	affymetrix	1		0.933334	-2.91476e-10	8.64533e-10
GSE19879_limThym_15min			GEO	cDNA	1		0.590127	7.107	1.07577e-11
GSE19879_limThym_30min			GEO	cDNA	1		0.955435	5.884e-11	7.57793e-11
GSE19879_limThym_45min			GEO	cDNA	1		0.89654	-6.66537e-12	1.9462e-12
GSE19879_limThym_60 min			GEO	cDNA	1		0.26744	12.7493	-2.55475e-12
GSE19879_limThym_90min			GEO	cDNA	1		1.00126	1.46057e-10	-1.35559e-10
GSE7656_30Â°C NaCl GB			GEO	affymetrix	1		0.39302	1.55847e-10	3.58308e-10
GSE7656_43Â°C			GEO	affymetrix	1		0.483125	3.78399	-2.7986e-11
GSE7656_43Â°C NaCl			GEO	affymetrix	1		0.567988	7.20291	-1.97289e-11
GSE7656_43Â°C NaCl GB			GEO	affymetrix	1		0.491927	1.70932e-10	3.58197e-10
GSE7656_30Â°C NaCl			GEO	affymetrix	1		0.419044	-2.87444e-10	-2.03887e-10
GSE7656_30Â°C NaCl GB			GEO	affymetrix	1		0.620126	-1.15237e-10	-6.40806e-10
GSE7656_43Â°C			GEO	affymetrix	1		0.464734	7.14423	2.22137e-11
GSE7656_43Â°C NaCl			GEO	affymetrix	1		0.464936	8.58072	1.33846e-10
GSE7656_43Â°C NaCl GB			GEO	affymetrix	1		0.552737	6.41572	7.81326e-13
GSE7656_30Â°C			GEO	affymetrix	1		0.395418	2.71791	5.86471e-10
GSE7656_30Â°C NaCl			GEO	affymetrix	1		0.321	8.88328	2.0954e-10
GSE7656_30Â°C NaCl GB			GEO	affymetrix	1		0.401142	8.51492	-1.42e-11
GSE7656_43Â°C			GEO	affymetrix	1		0.382782	3.85874	3.18916e-10
GSE7656_43Â°C NaCl			GEO	affymetrix	1		0.376287	9.4229	-1.44215e-10
GSE7656_43Â°C NaCl GB			GEO	affymetrix	1		0.401392	3.12607	4.03425e-11
GSE19879_zeroThym_15min			GEO	cDNA	1		1.01065	-4.50013e-11	3.89374e-11
GSE19879_zeroThym_30min			GEO	cDNA	1		1.0069	-8.45846e-11	3.83113e-11
GSE19879_zeroThym_45min			GEO	cDNA	1		1.01069	8.26997e-12	-2.07539e-12
GSE19879_zeroThym_60min			GEO	cDNA	1		1.01069	1.23156e-11	1.20902e-11
GSE19879_zeroThym_90min			GEO	cDNA	1		0.996415	2.53141e-12	6.21354e-13
GSE19879_zeroThym_15min			GEO	cDNA	1		0.566407	-1.39421e-11	3.04539e-11
GSE19879_zeroThym_45min			GEO	cDNA	1		0.601506	4.27494e-11	-1.47887e-10
GSE19879_zeroThym_60min			GEO	cDNA	1		0.965007	-6.18445e-11	2.19139e-11
GSE19879_zeroThym_90min			GEO	cDNA	1		0.926347	1.37898e-11	6.36843e-12
GSE19879_zeroThym_30min			GEO	cDNA	1		0.95211	-6.58293e-12	1.18242e-12
GSE12554_control			GEO	affymetrix	1		1.00371	-9.34041e-11	2.92397e-12
GSE12554_control			GEO	affymetrix	1		0.961117	-1.64523e-11	-3.0254e-11
GSE12554_Generation 50_10% Cranberry			GEO	affymetrix	1		0.778847	1.07908	-3.44077e-12
GSE12554_Generation 50_10% Cranberry			GEO	affymetrix	1		0.983195	1.00853e-11	-1.08877e-11
GSE12554_Generation 50_10% Cranberry			GEO	affymetrix	1		0.917154	-2.01163e-11	1.42515e-12
GSE12554_Generation 160_10%Cranberry			GEO	affymetrix	1		0.942473	2.11982e-11	1.4498e-12
GSE12554_Generation 160_10%Cranberry			GEO	affymetrix	1		0.718328	-9.08568e-10	-5.98379e-10
GSE12554_Generation 160_10%Cranberry			GEO	affymetrix	1		0.520204	5.06566e-12	3.6345e-11
GSE12554_Generation210_10%Cranberry			GEO	affymetrix	1		0.946294	-2.32252e-12	5.21279e-12
GSE12554_Generation210_10%Cranberry			GEO	affymetrix	1		0.687934	-5.6814e-11	-7.41e-12
GSE12554_Generation210_10%Cranberry			GEO	affymetrix	1		0.845167	1.57239	-7.15457e-11
GSE12554_Generation230_10%Cranberry			GEO	affymetrix	1		0.465901	4.74854e-11	-1.7557e-10
GSE12554_Generation230_10%Cranberry			GEO	affymetrix	1		0.855264	8.89498e-12	6.82307e-12
GSE12554_Generation230_10%Cranberry			GEO	affymetrix	1		0.871668	-7.15713e-12	-6.1396e-11
GSE30639_17KL			GEO	affymetrix	1		0.2612	3.42968	6.55405
GSE30639_17KL			GEO	affymetrix	1		0.249797	3.83569	8.868
GSE30639_17KL			GEO	affymetrix	1		0.270361	3.69724	10.9245
GSE30639_17KL			GEO	affymetrix	1		0.496826	2.22459e-09	2.90574
GSE30639_17KL			GEO	affymetrix	1		0.0302606	6.06452e-10	16.2678
GSE30639_17KS			GEO	affymetrix	1		0.351969	5.31189e-10	2.23279
GSE30639_17KS			GEO	affymetrix	1		0.301273	9.03962e-10	1.14957
GSE30639_17KS			GEO	affymetrix	1		0.443025	-1.09391e-09	8.86111
GSE30639_17KS			GEO	affymetrix	1		0.482986	-6.4593e-10	9.5878
GSE30639_17KS			GEO	affymetrix	1		0.38037	1.27275e-11	4.40801
GSE30639_17KS			GEO	affymetrix	1		0.317786	-9.01812e-10	2.08058
GSE30639_40KL			GEO	affymetrix	1		0.537059	-7.83864e-12	1.9714e-10
GSE30639_40KL			GEO	affymetrix	1		0	0	0
GSE30639_40KL			GEO	affymetrix	1		0	0	0
GSE30639_40KL			GEO	affymetrix	1		0.368957	-4.37832e-10	-1.11286e-09
GSE30639_40KL			GEO	affymetrix	1		0	0	0
GSE30639_40KS			GEO	affymetrix	1		0.449984	-2.8849e-09	10.8809
GSE30639_40KS			GEO	affymetrix	1		0.453249	4.41146e-09	10.7101
GSE30639_40KS			GEO	affymetrix	1		0.478814	-3.14229e-09	10.2199
GSE30639_40KS			GEO	affymetrix	1		0.492434	4.36264e-09	8.39031
GSE30639_40KS			GEO	affymetrix	1		0.488635	9.07544e-10	9.73204
GSE30639_40KS			GEO	affymetrix	1		0	0	0
GSE30639_6.5KL			GEO	affymetrix	1		0.515019	1.81399e-10	8.69475
GSE30639_6.5KL			GEO	affymetrix	1		0.501618	2.30178e-09	9.27011
GSE30639_6.5KL			GEO	affymetrix	1		0.441209	3.61478e-10	2.60858
GSE30639_6.5KL			GEO	affymetrix	1		0.419236	1.21562e-09	11.0954
GSE30639_6.5KL			GEO	affymetrix	1		0.356468	-6.77833e-10	2.37557
GSE30639_6.5KL			GEO	affymetrix	1		0.382791	-6.97118e-11	3.47306
GSE30639_6.5KS			GEO	affymetrix	1		0.490046	1.42268e-09	5.71354
GSE30639_6.5KS			GEO	affymetrix	1		0.413287	1.11387e-10	1.94645
GSE30639_6.5KS			GEO	affymetrix	1		0	0	0
GSE30639_6.5KS			GEO	affymetrix	1		0.21802	2.03387e-09	5.92614
GSE30639_6.5KS			GEO	affymetrix	1		0	0	0
GSE30639_6.5KS			GEO	affymetrix	1		0	0	0
GSE30639_Anc			GEO	affymetrix	1		1.01037	2.19007e-11	-2.36351e-12
GSE30639_Anc			GEO	affymetrix	1		0.925734	0.012176	-5.04306e-12
GSE30639_Anc			GEO	affymetrix	1		0.991938	-2.90211e-12	-2.0748e-12
GSE30639_Anc			GEO	affymetrix	1		0.456547	-2.40284e-09	7.01545
GSE17420_WT_EXP			GEO	affymetrix	1		0.720915	-1.18163e-10	0.158227
GSE17420_WT_EXP			GEO	affymetrix	1		0.85121	2.43337e-11	1.46375e-10
GSE17420_rpos_EXP			GEO	affymetrix	1		0.900119	4.19494e-11	-6.50356e-11
GSE17420_rpos_EXP			GEO	affymetrix	1		0.990857	-5.67e-11	3.96503e-11
GSE17420_rpos_EXP			GEO	affymetrix	1		1.00959	3.91419e-12	3.73147e-12
GSE17420_WT_STAT			GEO	affymetrix	1		0.721224	4.16036	6.13724e-12
GSE17420_WT_STAT			GEO	affymetrix	1		0	0	0
GSE17420_rpoS_STAT			GEO	affymetrix	1		0.381235	0.100051	-1.53044e-10
GSE17420_rpoS_STAT			GEO	affymetrix	1		0	0	0
GSE17420_rpoS_STAT			GEO	affymetrix	1		0	0	0
ref_GSE33147_wt_rep1			GEO	affymetrix	1		0.692578	3.42592	4.36088e-12
GSE11254_glucose			GEO	affymetrix	1		0.294219	-1.58498e-09	3.87442
GSE11254_mucus			GEO	affymetrix	1		0.119481	1.45664e-10	2.11562e-11
GSE11254_mucus			GEO	affymetrix	1		0.201479	1.6588e-11	-2.32928e-11
GSE11254_EDL933_glucose			GEO	affymetrix	1		0.586121	-4.48443e-10	-4.37203e-10
GSE11254_EDL933_glucose			GEO	affymetrix	1		0.656181	-1.4763e-10	4.53491e-10
GSE11254_EDL933_mucus			GEO	affymetrix	1		0.0975436	-3.47414e-11	-7.04079e-10
GSE11254_EDL933_mucus			GEO	affymetrix	1		0.736147	7.7758e-11	-3.06284e-10
GSE11254_ECOr26_glucose			GEO	affymetrix	1		0.341045	-2.07651e-11	2.73607
GSE11254_ECOr26_glucose			GEO	affymetrix	1		0.23327	-1.57478e-10	1.39275
GSE11254_ECOR26_mucus			GEO	affymetrix	1		0.131871	8.49665e-11	-1.85949e-10
GSE11254_ECOR26_mucus			GEO	affymetrix	1		0.142651	-2.16434e-11	-8.83828e-12
GSE11254_NISSLE_glucose			GEO	affymetrix	1		0.407084	1.30297e-11	3.67038e-10
GSE11254_NISSLE_glucose			GEO	affymetrix	1		0.876522	-2.47108e-12	1.26618e-10
GSE11254_NISSLE_mucus			GEO	affymetrix	1		0.832096	0.725322	8.24294e-11
GSE11254_NISSLE_mucus			GEO	affymetrix	1		0.531638	5.46686	2.14807e-11
GSE7656_30Â°C			GEO	affymetrix	1		0.460251	2.87591e-10	-1.32693e-10
GSE7656_30Â°C NaCl			GEO	affymetrix	1		0.433714	5.36817	-2.01884e-10
GSE13589_biofilm_inside			GEO	affymetrix	1		0.91196	0.322529	-4.53269e-12
GSE13589_biofilm_inside			GEO	affymetrix	1		0.936247	0.557089	2.32454e-12
GSE13589_biofilm_inside			GEO	affymetrix	1		0.811761	1.84201	-3.06133e-12
GSE13589_biofilm_outside			GEO	affymetrix	1		1.01035	-1.87325e-11	-4.82891e-12
GSE13589_biofilm_outside			GEO	affymetrix	1		1.01036	-1.68604e-12	-3.63001e-13
GSE13589_planktonic_exponential			GEO	affymetrix	1		0	0	0
GSE13589_planktonic_exponential			GEO	affymetrix	1		0	0	0
GSE13589_planktonic_exponential			GEO	affymetrix	1		0	0	0
GSE13589_planktonic_stationairy			GEO	affymetrix	1		0.141671	-2.73707e-12	2.14998e-11
GSE13589_planktonic_stationairy			GEO	affymetrix	1		0.150609	-2.33288e-12	1.92716e-11
GSE13589_planktonic_stationairy			GEO	affymetrix	1		0.145337	-4.30998e-11	-2.77307e-11
ref_GSE17420_WT_STAT			GEO	affymetrix	1		0.218993	1.79271e-11	-3.56836e-10
GSE11052_exp			GEO	UNKNOWN	1		0.081338	9.82687e-12	0.194579
GSE11052_exp			GEO	UNKNOWN	1		0.123608	-1.34061e-10	0.779383
GSE11052_exp_MAJ			GEO	UNKNOWN	1		0.218394	0.591213	7.5836e-11
GSE11052_exp			GEO	UNKNOWN	1		0	0	0
GSE11052_exp_MAJ			GEO	UNKNOWN	1		0	0	0
GSE11052_exp_MAJ			GEO	UNKNOWN	1		0.252684	3.19597	-1.00045e-10
GSE11052_exp_MAJ			GEO	UNKNOWN	1		0.263523	2.03142	-2.76273e-11
GSE11052_stat_MAJ			GEO	UNKNOWN	1		0.835128	1.00029	4.41663e-12
GSE11052_stat_MAJ			GEO	UNKNOWN	1		0.255139	8.10368e-11	2.34115e-10
GSE11052_stat_MAJ			GEO	UNKNOWN	1		0.829105	1.35487e-11	-8.18547e-12
GSE11052_stat_MAJ			GEO	UNKNOWN	1		0.549358	6.54217	3.79408e-12
GSE11052_exp_MAJ			GEO	UNKNOWN	1		0.178214	1.12301	2.17598e-12
GSE11052_stat_MAJ			GEO	UNKNOWN	1		0.198528	1.66471	-6.09135e-11
GSE11052_exp			GEO	UNKNOWN	1		0	0	0
GSE13361_ph7_BW			GEO	1Channel	1		0.356362	-1.70015e-10	-1.96899e-09
GSE13361_ph7_BW			GEO	1Channel	1		0.266677	-1.42027e-11	6.71915e-10
GSE13361_ph7_BW_crp			GEO	1Channel	1		0.18851	1.24229e-09	3.8502
GSE13361_ph7_BW_sucA			GEO	1Channel	1		0.26385	-8.53416e-12	2.89644e-10
GSE13361_ph7_BW_sucB			GEO	1Channel	1		0.227828	8.40583e-11	9.63454
GSE13361_ph7_BW_GcvP			GEO	1Channel	1		0.162821	1.44129e-10	2.17247
GSE13361_ph7_BW_phoP			GEO	1Channel	1		0.379259	-6.14448e-12	-1.43589e-11
GSE13361_ph7_BW_phoQ			GEO	1Channel	1		0.482378	-3.45419e-11	-5.99326e-11
GSE13361_ph7_BW_phoH			GEO	1Channel	1		0.182135	1.74869e-10	6.39838e-11
GSE13361_ph7_BW_hdeA			GEO	1Channel	1		0.121718	1.98211e-11	1.89478
GSE13361_ph7_BW_hdeB			GEO	1Channel	1		0.151097	2.27419e-10	1.11608
GSE13361_ph7_BW_gadB			GEO	1Channel	1		0.0949927	1.58144e-10	3.82666
GSE13361_ph7_BW_cadB			GEO	1Channel	1		0.104044	-4.52435e-11	4.06297e-11
GSE13361_ph7_BW_narX			GEO	1Channel	1		0.2031	3.40188e-10	1.19442
GSE13361_ph7_BW_fis			GEO	1Channel	1		0.136428	9.48867e-12	1.19747e-11
GSE13361_ph7_BW_rpoS			GEO	1Channel	1		0.0829177	-2.66299e-11	-3.9729e-11
GSE13361_ph7_BW_aceE			GEO	1Channel	1		0.117802	-1.84365e-10	0.442069
GSE13361_ph7_BW_hslJ			GEO	1Channel	1		0.362893	-7.94404e-11	-1.94164e-10
GSE13361_ph7_BW_ihfB			GEO	1Channel	1		0.24542	-9.93302e-12	1.35154e-10
GSE13361_ph7_BW_ycaD			GEO	1Channel	1		0.173025	-6.66199e-11	8.42533e-12
GSE13361_ph7_BW_spy			GEO	1Channel	1		0.224562	7.91275e-11	2.7247
GSE13361_ph7_BW_yjbJ			GEO	1Channel	1		0.197658	5.20271e-11	1.55913e-10
GSE13361_ph7_BW_cadA			GEO	1Channel	1		0.309784	9.21515e-11	6.08484
GSE13361_ph7_BW_grxA			GEO	1Channel	1		0.233983	2.14451e-10	9.44904e-10
GSE13361_ph7_BW_gadX			GEO	1Channel	1		0.233713	-1.25027e-11	0.448967
GSE13361_ph7_BW_gadW			GEO	1Channel	1		0.295629	8.83549e-11	2.96243
GSE13361_ph7_BW_adiA			GEO	1Channel	1		0.803072	-4.32411e-12	2.0077e-11
GSE13361_ph7_BW_trmE			GEO	1Channel	1		0.161409	-4.81283e-12	6.81104e-11
ref_GSE13361_ph7_BW			GEO	1Channel	1		0.229013	4.23229	1.49445e-10
ref_GSE13361_ph5.5_MG			GEO	1Channel	1		0.376703	2.48718	5.3921
GSE13361_ph7_MG_hns			GEO	1Channel	1		0.1159	1.42239e-08	1.77818e-07
GSE13361_ph5.5_BW_crp			GEO	1Channel	1		0.358783	-2.25506e-10	1.4264
GSE13361_ph5.5_BW_sucA			GEO	1Channel	1		0.345391	3.34678	-2.40415e-09
GSE13361_ph5.5_BW_sucB			GEO	1Channel	1		0.275084	10.0221	1.1287e-11
GSE13361_ph5.5_BW_GcvP			GEO	1Channel	1		0.477141	0.965474	-8.70297e-11
GSE13361_ph5.5_BW_phoP			GEO	1Channel	1		0.381305	8.45832	8.08656e-11
GSE13361_ph5.5_BW_phoQ			GEO	1Channel	1		0.478209	6.90196	9.05371e-11
GSE13361_ph5.5_BW_phoH			GEO	1Channel	1		0.300297	4.78667	1.18109e-11
GSE13361_ph5.5_BW_hdeA			GEO	1Channel	1		0.310008	4.44831	1.86911e-09
GSE13361_ph5.5_BW_hdeB			GEO	1Channel	1		0.277382	5.21728	-6.55132e-10
GSE13361_ph5.5_BW_gadB			GEO	1Channel	1		0.407359	1.09296	-7.88913e-10
GSE13361_ph5.5_BW_cadB			GEO	1Channel	1		0.420093	2.14596	5.98485e-10
GSE13361_ph5.5_BW_narX			GEO	1Channel	1		0.526611	0.905493	8.50091e-10
GSE13361_ph5.5_BW_fis			GEO	1Channel	1		0.287334	3.38181	-7.82705e-09
GSE13361_ph5.5_BW_rpoS			GEO	1Channel	1		0.440322	1.0159e-12	-3.79795e-11
GSE13361_ph5.5_BW_aceE			GEO	1Channel	1		0.482248	-3.21591e-11	-3.65073e-09
GSE13361_ph5.5_BW_hslJ			GEO	1Channel	1		0.347812	2.14121e-10	5.16219
GSE13361_ph5.5_BW_ihfB			GEO	1Channel	1		0.343697	9.63547	3.99684e-10
GSE13361_ph5.5_BW_ycaD			GEO	1Channel	1		0.538996	7.99814	3.08415e-12
GSE13361_ph5.5_BW_spy			GEO	1Channel	1		0.374204	2.47903	1.01245e-10
GSE13361_ph5.5_BW_yjbJ			GEO	1Channel	1		0.331504	10.755	-2.01136e-10
GSE13361_ph5.5_BW_cadA			GEO	1Channel	1		0.347707	3.3297	3.89817e-10
GSE13361_ph5.5_BW_grxA			GEO	1Channel	1		0.387731	3.44896	8.13496e-09
GSE13361_ph5.5_BW_gadX			GEO	1Channel	1		0.359171	8.12604	2.95101e-11
GSE13361_ph5.5_BW_gadW			GEO	1Channel	1		0.400825	7.76834	1.27617e-10
GSE13361_ph5.5_BW_adiA			GEO	1Channel	1		0.314657	-2.44385e-11	-4.57122e-11
GSE13361_ph5.5_BW_trmE			GEO	1Channel	1		0.640711	5.61774	1.41086e-10
ref_GSE13361_ph5.5_BW			GEO	1Channel	1		0.213848	-3.23051e-11	4.49228
GSE13361_ph5.5_MG_hns			GEO	1Channel	1		0.169358	4.89828	7.02832
GSE29440_control_Âµ=0.3/h_time=2h			GEO	affymetrix	1		0.356238	-3.93879e-11	5.11924e-11
GSE29440_control_Âµ=0.3/h_time=4h			GEO	affymetrix	1		0.485148	-3.28542e-11	3.26515e-12
ref_GSE29440_CG2strain_Âµ=0.6/h_time=0h			GEO	affymetrix	1		0.268033	8.62652e-12	6.95667e-12
GSE17465_t0			GEO	affymetrix	1		0.306063	11.474	-5.24091e-12
GSE17465_t0			GEO	affymetrix	1		0.446353	9.20312	5.29792e-11
GSE17465_t1			GEO	affymetrix	1		0.392711	4.32637e-10	-9.85259e-10
GSE17465_t1			GEO	affymetrix	1		0.977125	-4.30721e-12	8.40013e-12
GSE17465_t1			GEO	affymetrix	1		0.238752	6.01112e-10	5.49172e-10
GSE17465_t2			GEO	affymetrix	1		0.141781	-2.67007e-11	-3.79748e-09
GSE17465_t2			GEO	affymetrix	1		0.115015	-3.57872e-10	1.29789e-09
GSE17465_t2			GEO	affymetrix	1		0.140894	7.73587e-11	1.67712e-10
GSE17465_IrrE_t0			GEO	affymetrix	1		0.264481	2.26971	-1.24242e-10
GSE17465_IrrE_t0			GEO	affymetrix	1		0	0	0
GSE17465_IrrE_t0			GEO	affymetrix	1		0	0	0
GSE17465_IrrE_t1			GEO	affymetrix	1		0	0	0
GSE17465_IrrE_t1			GEO	affymetrix	1		0	0	0
GSE17465_IrrE_t1			GEO	affymetrix	1		0	0	0
GSE17465_IrrE_t2			GEO	affymetrix	1		0.294814	-1.05913e-09	8.09714e-10
GSE17465_IrrE_t2			GEO	affymetrix	1		0.281266	3.77533e-10	-3.64158e-10
GSE17465_IrrE_t2			GEO	affymetrix	1		0.405453	-1.90597e-10	6.08194e-11
_GSE14238_Hep_2			GEO	affymetrix	1		0	0	0
_GSE14238_Pen			GEO	affymetrix	1		0	0	0
_GSE14238_Hep_2			GEO	affymetrix	1		0	0	0
_GSE14238_Pen			GEO	affymetrix	1		0	0	0
_GSE14238_Hep_2			GEO	affymetrix	1		0	0	0
_GSE14238_MinMedia			GEO	affymetrix	1		0	0	0
_GSE14238_Pen			GEO	affymetrix	1		0	0	0
_GSE14238_Pen			GEO	affymetrix	1		0	0	0
_GSE14238_MinMedia			GEO	affymetrix	1		0.176363	2.72784	2.0362e-12
_GSE14238_Pen			GEO	affymetrix	1		0.120331	2.65693	-2.67392e-12
_GSE14238_Hep_2			GEO	affymetrix	1		0.122596	4.38062	3.2314e-11
_GSE14238_MinMedia			GEO	affymetrix	1		0	0	0
_GSE14238_Hep_2			GEO	affymetrix	1		0	0	0
_GSE14238_MinMedia_5%CO2			GEO	affymetrix	1		0	0	0
_GSE14238_MinMedia_5%CO2			GEO	affymetrix	1		0	0	0
_GSE14238_MinMedia_5%CO2			GEO	affymetrix	1		0	0	0
_GSE14238_MinMedia_5%CO2			GEO	affymetrix	1		0	0	0
GSE21869_PaeR7IR+M+_rep1			GEO	affymetrix	1		0	0	0
GSE21869_PaeR7IR+M+_rep2			GEO	affymetrix	1		0.716834	5.39973e-12	2.00708
GSE21869_PaeR7IR+M+_rep3			GEO	affymetrix	1		0.232948	-2.76097e-10	8.69146e-10
GSE21869_PaeR7IR+M-_rep1			GEO	affymetrix	1		0.734503	8.64193e-11	1.80912e-11
GSE21869_PaeR7IR+M-_rep2			GEO	affymetrix	1		0.4368	1.17167e-11	-4.64563e-11
GSE21869_PaeR7IR+M-_rep3			GEO	affymetrix	1		0.368672	3.61889e-10	1.50274e-10
GSE21869_PaeR7IR-M-_rep2			GEO	affymetrix	1		0.436569	1.62399e-11	-2.06828e-11
GSE21869_PaeR7IR-M-_rep3			GEO	affymetrix	1		0.371662	6.07111e-12	-1.62253e-12
GSE21869_PaeR7IR+M+_GEN70_3-11-2_rep1			GEO	affymetrix	1		0.3822	-1.89809e-09	4.17425e-10
GSE21869_PaeR7IR+M+_GEN70_3-11-2_rep2			GEO	affymetrix	1		0.381616	1.14281e-09	-3.77112e-10
GSE21869_PaeR7IR+M+_GEN70_3-11-4_rep1			GEO	affymetrix	1		0.212938	9.47769e-11	-3.873e-09
GSE21869_PaeR7IR+M+_GEN70_3-11-4_rep2			GEO	affymetrix	1		0.21004	-3.37666e-09	8.27489e-10
GSE21869_PaeR7IR+M+_GEN70_3-11-9_rep1			GEO	affymetrix	1		0	0	0
GSE21869_PaeR7IR+M+_GEN70_3-11-9_rep2			GEO	affymetrix	1		0	0	0
GSE21869_PaeR7IR+M+_GEN70_3-11-10_rep1			GEO	affymetrix	1		0	0	0
GSE21869_PaeR7IR+M+_GEN70_3-11-10_rep2			GEO	affymetrix	1		0	0	0
GSE21869_PaeR7IR+M+_GEN500_3-84-2_rep1			GEO	affymetrix	1		0	0	0
GSE21869_PaeR7IR+M+_GEN500_3-84-2_rep2			GEO	affymetrix	1		0	0	0
GSE21869_PaeR7IR+M+_GEN500_3-84-4_rep1			GEO	affymetrix	1		0.301963	3.33823e-11	-3.67431e-10
GSE21869_PaeR7IR+M+_GEN500_3-84-4_rep2			GEO	affymetrix	1		0	0	0
GSE21869_PaeR7IR+M+_GEN500_3-84-4_rep3			GEO	affymetrix	1		0	0	0
GSE21869_PaeR7IR+M+_GEN500_3-84-6_rep1			GEO	affymetrix	1		0	0	0
GSE21869_PaeR7IR+M+_GEN500_3-84-6_rep2			GEO	affymetrix	1		0	0	0
GSE21869_PaeR7IR+M+_GEN500_3-84-10_rep1			GEO	affymetrix	1		0	0	0
GSE21869_PaeR7IR+M+_GEN500_3-84-10_rep2			GEO	affymetrix	1		0	0	0
GSE21869_PaeR7IR+M+_GEN1000_3-172-1_rep1			GEO	affymetrix	1		0	0	0
GSE21869_PaeR7IR+M+_GEN1000_3-172-1_rep2			GEO	affymetrix	1		0	0	0
GSE21869_PaeR7IR+M+_GEN1000_3-172-1_rep3			GEO	affymetrix	1		0	0	0
GSE21869_PaeR7IR+M+_GEN1000_3-172-9_rep1			GEO	affymetrix	1		0	0	0
GSE21869_PaeR7IR+M+_GEN1000_3-172-9_rep2			GEO	affymetrix	1		0.637409	-3.47878e-10	-4.41992e-10
GSE21869_PaeR7IR+M+_GEN1000_3-172-10_rep1			GEO	affymetrix	1		0	0	0
GSE21869_PaeR7IR+M+_GEN1000_3-172-10_rep2			GEO	affymetrix	1		0	0	0
GSE29440_CG2strain_Âµ=0.6/h_time=2h			GEO	affymetrix	1		0.66199	-1.30765e-10	2.81385e-10
GSE29440_CG2strain_Âµ=0.6/h_time=4h			GEO	affymetrix	1		0.930433	-2.43066e-13	9.71277e-12
GSE29440_CG2strain_Âµ=0.6/h_time=6h			GEO	affymetrix	1		0.884418	8.9536e-12	-1.19233e-11
GSE29440_CG2strain_Âµ=0.3/h_time=2h			GEO	affymetrix	1		0.612259	2.95899	2.13279e-10
GSE29440_CG2strain_Âµ=0.3/h_time=4h			GEO	affymetrix	1		0.691681	2.16977	-4.71969e-10
GSE29440_CG2strain_Âµ=0.3/h_time=6h			GEO	affymetrix	1		0.570896	5.0588	4.1548e-11
ref_GSE29440_CG2strain_Âµ=0.3/h_time=0			GEO	affymetrix	1		0.368394	2.114	7.64509e-12
GSE17584_WT_+glu			GEO	affymetrix	1		0.520576	-1.11002e-10	-1.59782e-10
GSE17584_WT_+glu			GEO	affymetrix	1		0.597068	-2.75355e-10	3.04539e-10
GSE17584_WT_+glu			GEO	affymetrix	1		0.642536	1.53616e-10	9.19627e-11
GSE17584_WT_-glu			GEO	affymetrix	1		1.01029	-7.54134e-11	-4.39598e-11
GSE17584_WT_-glu			GEO	affymetrix	1		0.284617	-1.17745e-09	-7.99034e-10
GSE17584_mt_+glu			GEO	affymetrix	1		0.593618	0.233068	-3.4052e-10
GSE17584_mt_+glu			GEO	affymetrix	1		0.777379	-1.3187e-11	-9.53773e-11
GSE17584_mt_+glu			GEO	affymetrix	1		0.263528	5.45941e-12	-4.29233e-13
GSE17584_mt_+glu			GEO	affymetrix	1		0.290417	2.18236e-12	-2.54463e-10
GSE17584_mt_+glu			GEO	affymetrix	1		0.314964	9.37e-11	-1.8243e-10
GSE17584_mt_-glu			GEO	affymetrix	1		0.347408	-6.39722e-10	3.54861e-10
GSE17584_mt_-glu			GEO	affymetrix	1		0.287269	2.90293e-11	-1.22059e-10
GSE17584_mt_-glu			GEO	affymetrix	1		0.375595	8.79844e-12	2.98991e-12
GSE29440_control_Âµ=0.3/h_time=6h			GEO	affymetrix	1		0.337509	9.55875	-9.56561e-12
GSE13698_BW25113_H2O2			GEO	affymetrix	1		0.638021	5.84844e-12	-1.06701e-11
GSE13698_BW25113_water_ygiW			GEO	affymetrix	1		0.623984	-6.09146e-11	4.37293e-12
GSE13698_BW25113_water_ychH			GEO	affymetrix	1		0.831981	-1.19807e-11	4.04971e-11
GSE13698_BW25113_H2O2_ygiW			GEO	affymetrix	1		0.391393	-1.03527e-10	-2.00568e-11
GSE13698_BW25113_H2O2_ychH			GEO	affymetrix	1		0.299419	1.62605e-11	-3.95219e-10
GSE13698_TG1_pBS(kan)-TOM-Green_pMMB277-IsoILR1-GSHI_cis-DCE			GEO	affymetrix	1		0.335841	10.454	2.75083e-11
GSE13698_TG1_pBS(kan)_pMMB277_cis-DCE			GEO	affymetrix	1		0.515408	3.17152	1.39431e-12
GSE13698_TG1_pBS(kan)-TOM-Green_pMMB277-IsoILR1-GSHI			GEO	affymetrix	1		0.55036	6.89287	-6.80937e-12
ref_GSE13698_BW25113_water			GEO	affymetrix	1		0	0	0
GSE13698_TG1_pMMB206-TOM-Green_pBS(kan)_cis-DCE_EchA_F108L_I219L_C248I			GEO	affymetrix	1		0.198945	13.4886	1.33572e-11
_GSE7885_rpoS_biofilm			GEO	affymetrix	1		0.633618	1.94578	1.7073e-11
_GSE7885_rpoS_biofilm			GEO	affymetrix	1		0.495054	7.30788e-12	1.80446e-11
_GSE7885_rpoS_biofilm			GEO	affymetrix	1		0.56323	-2.30736e-10	6.44925
_GSE7885_WT_biofilm			GEO	affymetrix	1		0.364871	-5.65366e-12	-6.54891e-11
_GSE7885_WT_biofilm			GEO	affymetrix	1		0.869632	0.99193	-9.69883e-12
_GSE7885_rpoS_exp			GEO	affymetrix	1		0	0	0
_GSE7885_rpoS_exp			GEO	affymetrix	1		0.988472	-6.59447e-11	-5.8858e-10
_GSE7885_rpoS_exp			GEO	affymetrix	1		0.546564	-3.42924e-10	6.22811
_GSE7885_WT_exp			GEO	affymetrix	1		0.508979	1.65087e-10	7.34398
_GSE7885_WT_exp			GEO	affymetrix	1		0.532704	-8.93263e-11	6.48751
_GSE7885_WT_exp			GEO	affymetrix	1		0.506112	-2.81272e-10	7.09439
_GSE7885_WT_stat			GEO	affymetrix	1		0.730662	8.55269e-12	-1.36396e-12
_GSE7885_WT_stat			GEO	affymetrix	1		0.800409	2.78558	6.02781e-12
_GSE7885_WT_stat			GEO	affymetrix	1		0.81061	1.67183	-1.86646e-13
_GSE7885_rpoS_stat			GEO	affymetrix	1		0	0	0
_GSE7885_rpoS_stat			GEO	affymetrix	1		0	0	0
_GSE7885_rpoS_stat			GEO	affymetrix	1		0.488568	6.00616e-10	7.47877
GSE35371_tr_sin_con_8min_rep1			GEO	affymetrix	1		0.944155	-9.55702e-12	1.50165e-11
GSE35371_tr_sin_con_8min_rep2			GEO	affymetrix	1		1.00981	-3.52376e-11	4.1526e-11
GSE35371_tr_sin_con_8min_rep3			GEO	affymetrix	1		0.904576	-2.7358e-11	1.99294e-11
GSE35371_sham_sin_con_rep2			GEO	affymetrix	1		1.00487	3.39875e-12	3.2366e-12
GSE35371_sham_sin_con_rep3			GEO	affymetrix	1		0.918942	-3.85751e-11	-8.8069e-12
GSE35371_tr_sin_con_2.5h_rep1			GEO	affymetrix	1		0.943931	1.34934e-10	-4.90386e-11
GSE35371_tr_sin_con_2.5h_rep2			GEO	affymetrix	1		0.985555	-1.31415e-11	8.4551e-12
GSE35371_tr_sin_con_2.5h_rep3			GEO	affymetrix	1		0.979347	-1.40842e-10	-4.03026e-11
GSE35371_sham_sin_con_2.5h_rep2			GEO	affymetrix	1		1.00986	1.82498e-11	-2.03858e-12
GSE35371_sham_sin_con_2.5h_rep3			GEO	affymetrix	1		0.933701	-5.32007e-11	-4.89562e-11
GSE35371_tr_sin_con_15h_rep1			GEO	affymetrix	1		0.944373	-8.14028e-11	9.39836e-11
GSE35371_tr_sin_con_15h_rep2			GEO	affymetrix	1		1.01041	-4.84286e-11	6.83759e-11
GSE35371_tr_sin_con_15h_rep3			GEO	affymetrix	1		0.778601	3.43071	-3.34634e-11
GSE35371_sham_sin_con_15h_rep2			GEO	affymetrix	1		0.89052	3.27698e-11	4.50635e-11
GSE35371_sham_sin_con_15h_rep3			GEO	affymetrix	1		1.00288	-7.11838e-11	-4.41846e-12
GSE35371_tr_sin_int_2.5h_rep1			GEO	affymetrix	1		0.830552	1.62513	1.53486e-10
GSE35371_tr_sin_int_2.5h_rep2			GEO	affymetrix	1		0.889542	2.72121e-12	-9.89923e-11
GSE35371_tr_sin_int_2.5h_rep3			GEO	affymetrix	1		0.801538	-1.16146e-11	4.78249e-11
GSE35371_sham_sin_int_2.5h_rep2			GEO	affymetrix	1		0.898761	1.94851e-11	-2.21772e-11
GSE35371_sham_sin_int_2.5h_rep3			GEO	affymetrix	1		0.71198	-2.02296e-10	2.31082e-10
GSE35371_tr_sin_int_15h_rep1			GEO	affymetrix	1		1.00851	1.73704e-11	1.48501e-11
GSE35371_tr_sin_int_15h_rep2			GEO	affymetrix	1		0.873791	-2.44486e-10	8.66764e-11
GSE35371_tr_sin_int_15h_rep3			GEO	affymetrix	1		0.981016	-1.01022e-11	1.02515e-12
GSE35371_sham_sin_int_15h_rep2			GEO	affymetrix	1		0.960545	1.30567e-10	-1.06955e-10
GSE35371_sham_sin_int_15h_rep3			GEO	affymetrix	1		0.977914	-4.24785e-11	-4.96766e-12
GSE35371_tr_pwl_int_8min_rep1			GEO	affymetrix	1		0.912724	1.54866	1.44478e-12
GSE35371_tr_pwl_int_8min_rep2			GEO	affymetrix	1		0.729483	4.55946	2.27748e-11
GSE35371_tr_pwl_int_8min_rep3			GEO	affymetrix	1		0.945559	9.98591e-11	2.13201e-10
GSE35371_sham_pwl_int_8min_rep2			GEO	affymetrix	1		0.868791	1.53337	4.1204e-12
GSE35371_sham_pwl_int_8min_rep3			GEO	affymetrix	1		1.00734	2.83938e-11	1.37269e-11
GSE28412_t1_0.2h-1			GEO	affymetrix	1		0.434432	2.79553	8.84802
GSE28412_t2_0.2h-1			GEO	affymetrix	1		0.313537	2.11216	12.3943
GSE28412_t3_0.2h-1			GEO	affymetrix	1		0.755608	4.39325	-6.15804e-12
GSE35371_tr_pwl_int_2.5h_rep1			GEO	affymetrix	1		0.990061	1.57659e-11	1.00184e-12
GSE35371_tr_pwl_int_2.5h_rep2			GEO	affymetrix	1		1.01031	1.58807e-11	3.26119e-12
GSE35371_tr_pwl_int_2.5h_rep3			GEO	affymetrix	1		0.98822	4.52404e-12	-1.12967e-12
GSE35371_sham_pwl_int_2.5h_rep2			GEO	affymetrix	1		1.00489	8.88328e-11	-2.51462e-12
GSE35371_sham_pwl_int_2.5h_rep3			GEO	affymetrix	1		1.00996	1.28646e-11	-1.79741e-11
GSE28412_t1_0.3h-1			GEO	affymetrix	1		0.504955	-3.35967e-12	3.23466e-10
GSE28412_t2_0.3h-1			GEO	affymetrix	1		0.52381	5.56499	2.32761
GSE28412_t3_0.3h-1			GEO	affymetrix	1		0.533113	1.05933e-11	-8.86123e-12
GSE28412_t1_0.4h-1			GEO	affymetrix	1		0.932872	1.59966e-11	-1.67185e-12
GSE28412_t2_0.4h-1			GEO	affymetrix	1		0.539986	1.01002e-10	-5.9301e-10
GSE28412_t3_0.4h-1			GEO	affymetrix	1		0.719062	3.90958	2.26413e-11
GSE35371_tr_pwl_int_15h_rep1			GEO	affymetrix	1		0.87341	-8.73826e-11	-9.32471e-11
GSE35371_tr_pwl_int_15h_rep2			GEO	affymetrix	1		1.00981	-2.46025e-11	2.55864e-12
GSE35371_tr_pwl_int_15h_rep3			GEO	affymetrix	1		0.941312	6.7779e-12	-2.38938e-11
GSE35371_sham_pwl_int_15h_rep2			GEO	affymetrix	1		0.98834	-1.18349e-11	2.84616e-12
GSE35371_sham_pwl_int_15h_rep3			GEO	affymetrix	1		0.899772	-1.46963e-11	-5.67936e-11
ref_GSE28412_t0_0.3h-1			GEO	affymetrix	1		0.63131	3.09771e-10	1.44289e-09
ref_GSE28412_t0_0.4h-1			GEO	affymetrix	1		0.473742	4.2158	5.65856
GSE35371_neg_leftch_rep2			GEO	affymetrix	1		1.00614	-1.6898e-12	1.42853e-11
GSE35371_neg_leftch_rep3			GEO	affymetrix	1		1.00946	-4.64951e-11	5.22855e-11
GSE35371_neg_rightch_rep1			GEO	affymetrix	1		0.971866	-1.73357e-11	1.51529e-11
GSE35371_neg_rightch_rep2			GEO	affymetrix	1		0.943925	-5.11197e-11	-3.33701e-12
GSE35371_neg_rightch_rep3			GEO	affymetrix	1		0.981948	-2.01096e-10	-2.49403e-11
GSE35371_control_water_rep1			GEO	affymetrix	1		0.93601	6.10225e-11	-1.37044e-10
GSE35371_control_water_rep2			GEO	affymetrix	1		0.956284	2.58503e-10	-5.37388e-12
GSE35371_control_water_rep3			GEO	affymetrix	1		0.960085	2.85154e-10	-2.86166e-10
GSE35371_control_H2O2_rep1			GEO	affymetrix	1		0.923	1.76659e-12	-1.3752e-10
GSE35371_control_H2O2_rep2			GEO	affymetrix	1		0.781675	6.07271e-11	-2.48592e-10
GSE35371_control_H2O2_rep3			GEO	affymetrix	1		0.60161	1.85116	5.1428
GSE13361_ph5.5_BW			GEO	1Channel	1		0.207639	-2.43319e-11	5.30854
GSE13361_ph5.5_BW			GEO	1Channel	1		0.219084	6.9266e-11	8.81463
ref_GSE35371_sham_sin_con_rep1			GEO	affymetrix	1		0.953103	3.50023e-10	-2.41208e-10
ref_GSE35371_sham_sin_con_2.5h_rep1			GEO	affymetrix	1		0.977565	-7.6332e-12	-1.48017e-11
ref_GSE35371_sham_sin_con_15h_rep1			GEO	affymetrix	1		0.913846	-1.96362e-11	1.48348e-11
ref_GSE35371_sham_sin_int_2.5h_rep1			GEO	affymetrix	1		0.994121	-2.64507e-11	7.7662e-13
ref_GSE35371_sham_sin_int_15h_rep1			GEO	affymetrix	1		0.988513	-6.49902e-12	-5.96844e-12
ref_GSE35371_sham_pwl_int_8min_rep1			GEO	affymetrix	1		1.00798	5.58898e-11	-5.67608e-11
ref_GSE35371_sham_pwl_int_2.5h_rep1			GEO	affymetrix	1		0.975567	3.56971e-11	-4.19988e-12
ref_GSE35371_sham_pwl_int_15h_rep1			GEO	affymetrix	1		0.964071	5.73736e-12	1.54972e-13
GSE17526_rpoS_Log			GEO	affymetrix	1		0.912702	1.66208e-11	-5.64086e-11
GSE17526_rpoS_Stat			GEO	affymetrix	1		0.103444	4.59161	4.36016
GSE17526_rpoS_Stat			GEO	affymetrix	1		0.637698	1.71999e-11	-3.8888e-12
GSE17526_rpoS_Stat			GEO	affymetrix	1		0.265005	5.63687	4.78607
GSE17526_rpoS_Log			GEO	affymetrix	1		0.914801	1.84289e-10	1.35202e-10
GSE17526_rpoS_Log			GEO	affymetrix	1		0.26926	10.2285	-2.55269e-12
GSE17526_Log			GEO	affymetrix	1		0.945056	4.01416e-10	-3.63484e-10
GSE17526_Log			GEO	affymetrix	1		0.733306	0.335107	-3.92723e-09
GSE17526_Stat			GEO	affymetrix	1		0.151173	2.06654	2.25998e-11
GSE17526_Stat			GEO	affymetrix	1		0.0985267	5.25723	-1.84846e-11
GSE17526_Stat			GEO	affymetrix	1		0.0801033	2.99684	6.46513e-11
GSE17526_rpoS_Log_Ethanol			GEO	affymetrix	1		0.368243	6.0383	1.33568
GSE17526_rpoS_Log_Ethanol			GEO	affymetrix	1		0.2162	11.1263	-5.21755e-11
GSE17526_rpoS_Log_Ethanol			GEO	affymetrix	1		0.194685	11.1325	-6.88145e-11
GSE17526_rpoS_Stat_Ethanol			GEO	affymetrix	1		0.0874494	3.65947	-2.30947e-11
GSE17526_rpoS_Stat_Ethanol			GEO	affymetrix	1		0.0970943	2.8919	-2.00322e-10
GSE17526_rpoS_Stat_Ethanol			GEO	affymetrix	1		0.127072	10.0177	-2.48405e-12
GSE17526_Log_Ethanol			GEO	affymetrix	1		0.148854	11.2118	0.101377
GSE17526_Log_Ethanol			GEO	affymetrix	1		0.132608	9.79934	1.76377
GSE17526_Log_Ethanol			GEO	affymetrix	1		0.456401	1.73058	1.00406e-10
GSE17526_Stat_Ethanol			GEO	affymetrix	1		0.224405	5.42415e-11	-6.30837e-11
GSE17526_Stat_Ethanol			GEO	affymetrix	1		0.230114	4.77195	-8.52611e-11
GSE17526_Stat_Ethanol			GEO	affymetrix	1		0.238067	6.7307	-1.34916e-10
GSE20095_WT			GEO	affymetrix	1		0.959391	-2.52704e-11	9.32978e-12
GSE20095_WT			GEO	affymetrix	1		0.949177	-1.32609e-11	-6.61411e-12
GSE20095_rpoS_mt			GEO	affymetrix	1		0.628041	2.14697e-10	-5.70086e-10
GSE20095_rpoS_mt			GEO	affymetrix	1		0.979831	-1.16793e-11	3.88444e-12
GSE20095_rpoS_mt			GEO	affymetrix	1		0.970965	2.58827e-11	-2.1136e-10
GSE20095_rpoN_mt			GEO	affymetrix	1		0.748026	2.1393	1.61365e-11
GSE20095_rpoN_mt			GEO	affymetrix	1		0.65631	3.86219	3.4283e-11
GSE20095_rpoN_mt			GEO	affymetrix	1		0.544227	5.97137	1.59377e-11
GSE7326_controlpHSG415_0h			GEO	affymetrix	1		1.01024	-6.60195e-11	9.15809e-11
ref_GSE7326_controlpHSG415_1h			GEO	affymetrix	1		0.469635	1.80874e-11	-1.96257e-11
ref_GSE7326_controlpHSG415_1h50m			GEO	affymetrix	1		0.917037	-3.94112e-10	-2.41509e-10
ref_GSE7326_controlpHSG415_3h			GEO	affymetrix	1		0.585486	-1.00414e-11	-1.42763e-12
[truncated: 370 more rows]
